# Supplementary material for: Profiling DNA break sites and transcriptional changes in response to contextual fear learning
Source: PLoS One. 2021 Jul 1;16(7):e0249691. doi: 10.1371/journal.pone.0249691 (PMC8248687; doi:10.1371/journal.pone.0249691)
Supplement: S4 Table — (XLSX) [file pone.0249691.s004.xlsx]

## Sheet: NR3C1_ChIP_Anno
Rat Glucocorticoid Receptor ChIP-Seq from: Polman et al.; doi:10.1210/en.2012-2187 & Pooley et al.; doi:10.1210/en.2016-1929
converted to MM10 and filtered for the presence of the GRE motif
Annotated to single nearest gene with GREAT
All Peaks
Chromosome	Start	End	Nearest Gene
chr7	58772208	58772386	Atp10a (+114051)
chr11	80148385	80148638	Adap2 (-5593)
chr9	77583313	77583551	Lrrc1 (-38562)
chr6	86265049	86265483	Tgfa (+70043)
chr1	194607153	194607778	Plxna2 (-12359)
chr10	29213779	29214177	9330159F19Rik (+2372)
chr7	97747916	97749093	Aqp11 (-10216)
chr1	86483792	86483910	Ptma (-42875)
chr19	40431991	40432515	Sorbs1 (+81483)
chr11	113806726	113807823	Cdc42ep4 (-55957)
chr10	77440945	77441064	Adarb1 (-22735)
chr18	36384960	36385122	Cystm1 (+36267)
chr19	50476515	50476695	Sorcs1 (+202041)
chr4	150799909	150800160	Errfi1 (-55038)
chr12	31857598	31858326	Hbp1 (+92573)
chrX	143080711	143081228	Rgag1 (-18624)
chr10	94296979	94297632	Ndufa12 (+98302)
chr4	132038625	132039345	Epb41 (+33112)
chr17	5599173	5599289	Zdhhc14 (+106631)
chr12	79968425	79968956	Zfp36l1 (+144322)
chr14	15192078	15192642	Lrrc3b (+246627)
chr8	86749790	86750581	Siah1a (-4252)
chr17	34676504	34676997	Tnxb (+6216)
chr5	102109937	102110609	Wdfy3 (-40352)
chr14	27349538	27350295	Fam208a (-78917)
chr1	165717693	165718454	Rcsd1 (-10026)
chr1	74014674	74015076	Tns1 (+109572)
chr18	4737879	4738645	Jcad (+103333)
chr2	78416771	78417059	Ube2e3 (-452132)
chr10	21993327	21993915	4930444G20Rik (+74458)
chr8	12905625	12906147	Mcf2l (-10007)
chr7	97034144	97034825	Gab2 (-47101)
chr7	64981642	64982276	Nsmce3 (-108962)
chr15	92547759	92548008	Pdzrn4 (+150969)
chr15	36739972	36740325	Ywhaz (+54389)
chr8	15072758	15073608	Myom2 (+15530)
chr5	135465525	135466286	Pom121 (-71360)
chr14	12190934	12191428	3830406C13Rik (-92992)
chr16	38673141	38674177	Arhgap31 (+39615)
chr8	95886963	95887318	Got2 (+1406)
chr6	31345308	31345843	Mkln1 (-53159)
chr15	7088738	7089262	Lifr (-65353)
chr2	131599644	131599885	Adra1d (-37482)
chr2	163595826	163596549	Ttpal (-6126)
chr1	104814997	104815765	Cdh20 (+46852)
chr3	56988499	56988822	Tm4sf1 (+313275)
chr12	25240116	25240717	Id2 (-143277)
chr8	70833126	70834177	Arrdc2 (+6068)
chr15	51730522	51731377	Eif3h (+134531)
chr18	4059131	4059342	Lyzl1 (-106595)
chr13	99867301	99867451	Cartpt (+33265)
chr4	118071914	118072213	St3gal3 (+62826)
chr8	114684243	114684783	Wwox (+244858)
chr7	132766474	132766937	Fam53b (+46822)
chr1	194651966	194652630	Plxna2 (+32473)
chr17	43364565	43365706	Adgrf5 (-24330)
chr3	52527131	52527946	Foxo1 (+259203)
chr6	90470900	90471771	Klf15 (+8662)
chr10	66898021	66898350	Reep3 (+198759)
chr14	54748070	54748327	Slc7a8 (+33687)
chr7	81110078	81110561	Slc28a1 (-4530)
chr14	55519358	55520051	Nrl (+4486)
chr11	115751921	115752014	Tmem94 (-13465)
chr1	129930894	129931438	Cd55b (+491843)
chr4	150086750	150087412	Gpr157 (-284)
chr2	91963079	91963423	Dgkz (-12824)
chr1	153011481	153012233	Nmnat2 (+56859)
chr11	69098812	69099970	Per1 (+443)
chr9	60541788	60542256	Thsd4 (-30987)
chr11	81239030	81239626	Asic2 (-86007)
chr8	72268093	72268851	Ap1m1 (+28454)
chr11	4215790	4216979	Gatsl3 (-1840)
chr2	168337570	168338023	Kcng1 (-56665)
chr11	86330544	86330974	Med13 (+26843)
chr14	70138322	70138516	Ccar2 (+15392)
chr5	17456939	17457237	Speer4f1 (-19010)
chr4	119128998	119129507	Slc2a1 (+20542)
chr15	102102298	102103104	Tns2 (-287)
chr12	67212948	67213142	Mdga2 (+7997)
chr17	49948355	49948876	Rftn1 (+242058)
chr11	76267784	76268559	Glod4 (-24447)
chr17	28419889	28420819	Tulp1 (-55206)
chr11	30226092	30226197	Sptbn1 (+42024)
chr17	28517618	28518657	Fkbp5 (-614)
chr10	84119896	84120495	Nuak1 (+320401)
chr8	94170951	94172069	Mt2 (-1154)
chr2	137821328	137821605	Btbd3 (-457026)
chr19	3681011	3681575	Lrp5 (+5263)
chr11	117259552	117260107	Sept9 (+60169)
chr14	25708830	25709463	Ppif (+14977)
chr17	65674714	65675520	Txndc2 (-32913)
chr7	73330525	73331450	Rgma (-44532)
chr16	77760611	77760882	Gm11146 (-158653)
chr13	42374167	42374801	Edn1 (+73008)
chr1	20919604	20920307	Paqr8 (+29350)
chr4	134355795	134356509	Slc30a2 (+12946)
chr8	121562668	121563597	Fbxo31 (+15673)
chr2	152819833	152820987	Bcl2l1 (+10256)
chr8	46875888	46876433	Enpp6 (-110726)
chr19	23214173	23214795	Smc5 (+59413)
chr12	16551089	16551668	Lpin1 (+38391)
chr2	30753082	30753859	1700001O22Rik (+48236)
chr16	57314977	57315369	Tmem30c (-22322)
chr4	141862655	141863312	Efhd2 (+11936)
chr1	171240158	171240330	Fcer1g (-5879)
chr1	156788873	156789083	Angptl1 (-49584)
chr5	104236805	104236961	Dmp1 (+34270)
chr17	28513769	28514347	Fkbp5 (+3466)
chr10	59973813	59974800	Ddit4 (-22473)
chr12	105448746	105448945	D430019H16Rik (-5010)
chr11	88112618	88114043	Cuedc1 (+14185)
chr7	143055790	143056215	Cd81 (+3264)
chr8	68661670	68661802	Csgalnact1 (+73410)
chr6	137487478	137487617	Eps8 (+161737)
chr11	98738675	98739209	Thra (-2869)
chr14	77569008	77569748	Gm1587 (+229486)
chr2	138073962	138074606	Btbd3 (-204209)
chr10	46231701	46231817	Hace1 (+653930)
chr1	91199846	91200160	Ramp1 (+19957)
chr5	74321269	74321582	Rasl11b (+126140)
chr16	41745037	41745558	Lsamp (+212440)
chr5	150468294	150468934	Zar1l (+49550)
chr11	54112696	54113945	P4ha2 (+12358)
chr1	113489057	113489195	NONE
chr17	56108495	56109244	Plin4 (+933)
chr5	75987749	75987906	Kdr (-9370)
chr4	155469420	155470081	Tmem52 (+637)
chr2	132302603	132302815	Cds2 (+39561)
chr1	129373063	129373352	Thsd7b (+99864)
chr4	133107659	133108376	Wasf2 (-22487)
chr4	98091240	98091997	Tm2d1 (+291687)
chr17	43387224	43387474	Adgrf5 (-2117)
chr1	77987158	77987672	Pax3 (+209423)
chr6	72593198	72593711	Elmod3 (+4887)
chr2	39007920	39013845	Arpc5l (+2807)
chr11	30102946	30103089	Eml6 (-76985)
chr12	5268173	5268770	Klhl29 (+107210)
chr6	93223928	93224519	Adamts9 (-322783)
chr17	6661305	6661543	Dynlt1f (-5485)
chr10	127729321	127729446	Tac2 (+4906)
chr6	146501464	146502203	Itpr2 (+78)
chr15	81106066	81106705	Mkl1 (-1303)
chr6	32167897	32168072	1700012A03Rik (+117700)
chr7	90059367	90060030	Picalm (-70516)
chr3	31229035	31229837	Cldn11 (+79516)
chr15	99717416	99718098	Gpd1 (+242)
chr14	57720597	57724459	Lats2 (+23595)
chr16	93072113	93072267	Runx1 (-246041)
chr3	41430108	41430650	Jade1 (-132990)
chr11	119592829	119593431	Rptor (-10019)
chr4	87013933	87014667	Acer2 (+139904)
chr4	150825106	150825252	Errfi1 (-29894)
chr5	132337738	132338055	Auts2 (-860873)
chr1	179814591	179815107	Ahctf1 (-11169)
chr12	100480518	100481173	Ttc7b (+39980)
chr17	35848201	35848613	Mdc1 (+6892)
chr2	165883528	165884289	Zmynd8 (-5472)
chr2	25478017	25478851	Ptgds (-8592)
chr15	88831571	88831715	Creld2 (+11997)
chr16	31428760	31429618	Bdh1 (+441)
chr12	110976206	110976309	Ankrd9 (+2782)
chr15	79733649	79733788	Sun2 (+8817)
chr9	46908217	46908365	Gm4791 (-90450)
chr18	78995906	78996085	Setbp1 (+113395)
chr11	32963592	32963831	Smim23 (-139107)
chr6	88744948	88745265	Mgll (+20403)
chr7	112326775	112327398	Micalcl (-41221)
chr7	4111664	4112298	Ttyh1 (-7604)
chr6	145046267	145047165	Bcat1 (+2096)
chr16	91569041	91569196	Ifngr2 (+22047)
chr6	35349662	35350412	Fam180a (-23896)
chr13	91477816	91478596	Ssbp2 (+17156)
chr14	47958309	47958500	Peli2 (-162464)
chr17	56756642	56757263	Nrtn (+577)
chr11	75620202	75620828	Inpp5k (-10473)
chr2	158712369	158713092	Ppp1r16b (+47333)
chr7	73608672	73609331	Chd2 (-67256)
chr3	89904857	89905540	Il6ra (+7963)
chr19	23056541	23057665	Klf9 (-84123)
chrX	151456134	151456282	Phf8 (-64464)
chr10	21573831	21574036	1700020N01Rik (-19211)
chr1	133412821	133413451	Sox13 (+11241)
chr2	19145324	19146452	Armc3 (-53414)
chr13	99737040	99737668	Cartpt (+163287)
chr10	86341212	86342120	Timp3 (+41294)
chr10	60081894	60082433	Spock2 (-24055)
chr13	101811760	101812448	Pik3r1 (-43887)
chr17	27018662	27019082	Bak1 (+10137)
chr1	186618780	186619026	Tgfb2 (+86797)
chr7	35021357	35021859	Cebpg (+34965)
chr9	64697053	64697202	Rab11a (+40630)
chr11	17351615	17351809	C1d (+94118)
chr2	67107350	67107576	Gm21830 (-306262)
chr15	81834407	81834547	Gm8444 (+9222)
chr16	25058934	25059922	Tprg (-227389)
chr7	80415301	80415501	Furin (-13694)
chr9	61573414	61574232	Tle3 (+200438)
chr11	69096590	69097647	Per1 (-1829)
chr17	28522680	28523649	Fkbp5 (-5641)
chr12	111908291	111908801	Ppp1r13b (-436)
chr3	95904811	95905126	Car14 (-278)
chr11	98048997	98049603	Stac2 (+4162)
chr9	49594131	49594817	Ttc12 (-108249)
chr5	31772067	31772181	Babam2 (+74074)
chr5	118424454	118425169	Med13l (-135927)
chr1	75144568	75144751	Retreg2 (+1874)
chr2	68003373	68003516	B3galt1 (-114268)
chr5	92102603	92102800	G3bp2 (-19464)
chr11	51873969	51874783	Jade2 (-16723)
chr16	52094743	52094913	Cblb (+63279)
chr5	135706963	135707446	Por (+18169)
chr8	121905180	121905404	Slc7a5 (+2402)
chr8	47354737	47355591	Stox2 (-65762)
chr13	94290577	94290693	Scamp1 (-4806)
chr2	5345648	5346562	Ccdc3 (+208329)
chr12	44270292	44270450	Pnpla8 (+1223)
chr13	20248924	20249711	Elmo1 (+158699)
chr15	6980927	6981636	Osmr (-106313)
chr15	39746250	39746650	Dcstamp (+518)
chr3	101011946	101012815	Cd101 (+17175)
chr2	165152898	165153442	1700025C18Rik (-62420)
chr18	83932848	83933360	Tshz1 (+153300)
chr1	136178585	136179021	Mroh3 (+34025)
chr12	111646705	111647264	Ckb (+25353)
chr1	149871454	149872229	Pla2g4a (+89448)
chr12	5216540	5216716	Klhl29 (+159054)
chr2	173255900	173256239	Pmepa1 (+20463)
chr11	67667465	67668250	Rcvrn (-27468)
chr3	80800825	80801543	Gria2 (+1651)
chr15	38585302	38586072	Azin1 (-66421)
chr15	84997857	84998296	5031439G07Rik (-10106)
chr4	133240296	133241031	Map3k6 (-154)
chr15	84639178	84640166	Prr5 (-41330)
chr3	52384365	52384610	Foxo1 (+116152)
chr11	35639129	35639907	Pank3 (-129966)
chr3	138770609	138771281	Tspan5 (+28750)
chr2	167672232	167672470	Tmem189 (-10795)
chr2	5484121	5484244	Camk1d (+230332)
chr12	16643526	16644038	Ntsr2 (-9702)
chr15	59204269	59204724	Sqle (-110584)
chr10	106561541	106562199	Ppfia2 (+91524)
chr4	127833498	127834236	CK137956 (+137084)
chr11	88649818	88650303	Msi2 (+68040)
chr15	7039079	7039556	Lifr (-115035)
chr18	83523723	83524438	Tshz1 (+562323)
chr18	22985066	22985792	Nol4 (+54915)
chr3	51661787	51663061	Mgst2 (+1245)
chr12	80810912	80811457	Susd6 (+20626)
chr2	168306785	168307223	Kcng1 (-25872)
chr2	110896436	110897196	Ano3 (+54107)
chr6	144753929	144754511	Bcat1 (+294592)
chr19	38260210	38260892	Lgi1 (-3985)
chr12	80821139	80821864	Susd6 (+30943)
chr16	4644879	4645449	Vasn (+5223)
chr4	132963728	132963895	Fgr (-10290)
chr2	157377378	157377623	Manbal (+9907)
chrX	140513315	140513757	Prps1 (+56923)
chr17	55957074	55957678	Ccdc94 (-1811)
chr19	46908564	46909531	Ina (-105650)
chr10	76636098	76636442	Col6a2 (-12640)
chr12	80527297	80528426	Galnt16 (+9585)
chr13	49096879	49097154	Wnk2 (+50997)
chr1	172365417	172365980	Pigm (-10847)
chr6	84210004	84210624	Dysf (+190925)
chr7	112469746	112470470	Parva (+42402)
chr13	101092226	101092870	Slc30a5 (-259121)
chr18	23511395	23512321	Dtna (+96416)
chr8	94178777	94179287	Mt1 (-50)
chr16	31039706	31042776	Xxylt1 (+40191)
chr17	28521907	28522259	Fkbp5 (-4559)
chr1	153720689	153720854	Rgs16 (-19577)
chr18	54250764	54250972	Csnk1g3 (+388755)
chr2	155052743	155053332	Ahcy (+21459)
chr7	34309472	34309608	4931406P16Rik (+4011)
chr8	56259984	56260307	Hpgd (-34439)
chr11	36331717	36332339	Wwc1 (-351501)
chr12	40016677	40017373	Arl4a (+20404)
chr7	27338959	27339818	Ltbp4 (-1697)
chr9	110345146	110345331	Scap (+11883)
chr2	52310949	52311074	Neb (+27786)
chr14	25377788	25378224	Zmiz1 (-81218)
chrX	166271355	166271919	Gpm6b (-73055)
chr6	135340801	135341036	Emp1 (-21626)
chr5	113930838	113931492	Coro1c (-22407)
chr4	6937282	6937441	Tox (+53437)
chr12	54247225	54247323	Egln3 (-43414)
chr2	168205098	168205826	Adnp (+1650)
chr6	136820574	136822917	Wbp11 (+6487)
chr17	84116528	84117092	Zfp36l2 (+71137)
chr6	31348465	31348572	Mkln1 (-50216)
chrX	159645397	159645582	Sh3kbp1 (+18218)
chr14	23751762	23751973	Kcnma1 (+252337)
chr3	42201407	42201788	D3Ertd751e (+458980)
chr9	44086198	44086755	Mfrp (-15252)
chr2	151573384	151574073	Sdcbp2 (+1107)
chr8	124586089	124586518	Capn9 (+10193)
chr8	3376814	3377357	Arhgef18 (-15952)
chr6	146010361	146010927	Sspn (+76522)
chr14	66190020	66190833	Chrna2 (+49494)
chr9	97685573	97686242	Trim42 (-315950)
chr6	117067578	117068331	Cxcl12 (-100622)
chr8	121376165	121376887	1700018B08Rik (+165428)
chr5	141324641	141325402	Sdk1 (+83532)
chr1	83595394	83595613	Sphkap (-187304)
chr1	186309257	186309975	Lyplal1 (-192306)
chr15	20223018	20223697	Acot10 (+443392)
chr12	14149865	14150580	Fam84a (+1831)
chr2	164455827	164456020	Sys1 (-1052)
chr7	110498941	110499150	Sbf2 (+115874)
chr4	95742887	95743342	Fggy (+185608)
chr5	116328118	116328582	Ccdc60 (-39365)
chr7	72162237	72162688	Mctp2 (+144145)
chr12	82369434	82369778	Sipa1l1 (+200186)
chr17	33774610	33775168	Angptl4 (+6686)
chr15	74484152	74484707	Adgrb1 (-31765)
chr7	55877859	55878038	Cyfip1 (+35878)
chr4	81430126	81430467	Mpdz (+12510)
chr19	42669844	42670285	Loxl4 (-57252)
chr12	11727301	11727710	Rad51ap2 (+271427)
chr18	61655799	61656469	Il17b (-31801)
chr3	130494831	130495496	Etnppl (-122405)
chr6	83302194	83302878	Mthfd2 (+15070)
chr17	47507622	47508554	Ccnd3 (+3037)
chr4	106798659	106799271	Acot11 (+6033)
chr8	111796348	111797210	Bcar1 (-52970)
chr11	56244881	56245606	Nmur2 (-204234)
chr1	87650656	87651433	Inpp5d (+30733)
chr14	66274549	66275422	Ptk2b (+6066)
chr1	36572660	36572840	Sema4c (-15224)
chr4	150603114	150603222	Slc45a1 (+49006)
chr7	130320680	130320941	Fgfr2 (-54620)
chr10	14100043	14100648	Hivep2 (+133967)
chr5	131813044	131813697	Auts2 (-336347)
chr2	148861246	148862167	9230104L09Rik (-10773)
chr15	76399996	76400252	Mroh1 (+19611)
chr19	22684584	22684910	Klf9 (-456479)
chr17	34583307	34583857	Gpsm3 (-6224)
chr16	43478257	43478526	Tigit (+185792)
chr5	31566456	31566608	Slc4a1ap (+39520)
chr9	32940879	32941313	Ets1 (+245074)
chr4	138278251	138278846	Kif17 (+16317)
chr5	34182961	34183681	Mxd4 (+4389)
chr3	107690153	107690977	Ahcyl1 (+5995)
chr10	27387647	27387853	Lama2 (+229093)
chr17	83939083	83939812	Haao (-92658)
chr4	20816532	20816743	Nkain3 (-38071)
chr8	108854306	108854929	Pmfbp1 (-639409)
chr19	23133386	23135502	Klf9 (-6782)
chr2	35440265	35440392	Ggta1 (+21120)
chr3	52629840	52630531	Foxo1 (+361850)
chr10	88392203	88393092	Gnptab (+13422)
chr13	13628726	13629473	Lyst (+38703)
chr18	76011235	76011591	Zbtb7c (+191235)
chr2	138793031	138793583	Btbd3 (+514814)
chr11	88644353	88645165	Msi2 (+73342)
chr7	29318395	29319188	Dpf1 (+14816)
chr17	93598292	93598523	Adcyap1 (+398986)
chr4	102772241	102772394	Sgip1 (+11955)
chr13	42734480	42734749	Phactr1 (+25034)
chr2	154707963	154708256	Chmp4b (+51092)
chr11	108061868	108062642	Cacng5 (-147200)
chr14	18303355	18303604	Ube2e1 (+28379)
chr9	68679781	68680589	Rora (+26399)
chr3	121636557	121636691	4930432M17Rik (-34138)
chr1	169096501	169096650	Nuf2 (+434888)
chr4	130919439	130919951	Laptm5 (+6570)
chr18	69689639	69690210	Ccdc68 (-235541)
chr2	71162645	71163384	Cybrd1 (+45092)
chr13	97775078	97775196	Gm10260 (-14505)
chr16	10912565	10912712	Rmi2 (+77580)
chr13	99124900	99125508	Zfp366 (-59619)
chr1	74007603	74008196	Tns1 (+116547)
chr16	24781731	24782532	Lpp (+388782)
chr18	14201799	14202774	Gm5160 (-222581)
chr15	83606791	83607089	Ttll12 (-11783)
chr13	97183073	97183648	Hexb (+14996)
chr15	25564163	25564236	Myo10 (-58325)
chr11	32622315	32622441	Fbxw11 (-20497)
chr10	28738023	28738136	Themis (+69720)
chr9	77941011	77941216	Elovl5 (+23750)
chr9	63000513	63000739	Pias1 (-19747)
chr6	114459753	114460340	Hrh1 (+62111)
chr1	37083731	37084095	Vwa3b (+54529)
chr2	160804900	160805768	Zhx3 (+67238)
chr4	131014451	131014774	Matn1 (+70228)
chr4	58457887	58458121	Lpar1 (+95307)
chr6	108457055	108457315	Bhlhe40 (-203444)
chr11	119959733	119960199	Baiap2 (+17203)
chr18	11144726	11145349	Gata6 (+92528)
chr13	101278099	101278573	Slc30a5 (-444909)
chr12	105352727	105353299	Tunar (+16419)
chr9	61323873	61324141	Tle3 (-49378)
chr6	55208337	55209614	Mindy4 (+5593)
chr19	22961871	22962165	Klf9 (-179208)
chr17	45181385	45182040	Cdc5l (+251994)
chr5	20285965	20286932	Phtf2 (+595675)
chr5	92390421	92391085	Cxcl10 (-41871)
chr10	3715337	3715447	Plekhg1 (-24972)
chr12	70798393	70798656	Frmd6 (-26989)
chr19	24762952	24763061	Tmem252 (+88999)
chr7	55870344	55870781	Cyfip1 (+28492)
chr3	158310419	158310567	Lrrc7 (+251728)
chr5	118143809	118144000	Fbxw8 (+11559)
chr3	89391380	89391625	Zbtb7b (-3832)
chr17	26534883	26535978	Gm8225 (-7329)
chr15	11055205	11055310	Adamts12 (-9532)
chr19	32359168	32359415	Sgms1 (-9976)
chr13	52024870	52025087	Gadd45g (+178301)
chr2	166417293	166418063	Sulf2 (-262015)
chr4	56113359	56114373	Klf4 (-581400)
chr3	152843210	152843323	Pigk (+129154)
chr11	68557447	68557561	Mfsd6l (+1318)
chrX	164441866	164442202	Asb11 (+5040)
chr8	9618470	9618784	Fam155a (+152534)
chr18	60927082	60927427	Camk2a (+1637)
chr10	122900626	122900773	Mon2 (+175805)
chr2	9287939	9288181	Gata3 (+590540)
chr8	17104300	17104472	Csmd1 (+430895)
chr2	118494777	118495259	Srp14 (-15307)
chr9	62997696	62998237	Pias1 (-17088)
chr9	119970952	119971462	Csrnp1 (+6128)
chr8	10910813	10911362	Irs2 (+97370)
chr7	63896599	63897694	E030018B13Rik (-19710)
chrX	13469216	13470158	Nyx (+3577)
chr16	25529860	25529981	Trp63 (-153844)
chr4	95628326	95628541	Fggy (+70927)
chr7	80246355	80246622	Ttll13 (+113)
chr1	164460896	164461325	Atp1b1 (-2756)
chr12	91015000	91015475	Dio2 (-276800)
chr3	136823473	136823900	Ppp3ca (+152917)
chr17	26616583	26617370	Ergic1 (+55488)
chr4	64594905	64595473	Pappa (-528985)
chr11	108022866	108023679	Cacng5 (-108218)
chr19	60440382	60441140	Prlhr (+27543)
chr13	51847688	51848585	Gadd45g (+1459)
chr13	41670045	41670767	Tmem170b (+64190)
chrX	77479870	77480041	Tbl1x (-31057)
chr19	44931266	44931641	Slf2 (+335)
chr17	80755007	80755582	Map4k3 (-27202)
chr11	50744638	50745450	Zfp354c (+82646)
chr17	91025360	91025517	Gm10308 (-63054)
chr12	75304165	75304570	Rhoj (-3954)
chr4	154482670	154483184	Prdm16 (+153939)
chr19	3852329	3853372	Chka (+775)
chr15	52712336	52712919	Med30 (+183)
chr12	99609913	99610073	Foxn3 (-216196)
chr4	31819549	31820036	Map3k7 (-144304)
chr19	41509242	41509646	Lcor (+26799)
chr11	80304719	80305370	Rhbdl3 (+4133)
chr1	172295536	172296451	Atp1a2 (+2070)
chr11	114070119	114070537	Sdk2 (-4110)
chr7	75399363	75399605	Akap13 (-56050)
chr12	15472620	15473085	Trib2 (+343932)
chr4	72124937	72125198	Tle1 (+75789)
chr3	105181385	105181755	4930564D02Rik (+114726)
chr5	115240098	115240737	Pop5 (+4582)
chr2	155903368	155904051	Uqcc1 (+26600)
chr12	104836948	104837476	Clmn (+27797)
chr9	48737183	48738188	Zbtb16 (+98259)
chr16	21169014	21169123	Teddm3 (-15069)
chr1	12292623	12292788	Sulf1 (-399571)
chr11	31806244	31806953	Cpeb4 (-65612)
chr11	69147495	69148004	Alox12b (-9239)
chr17	3397679	3398232	Tiam2 (+71383)
chr7	117658050	117658723	Xylt1 (+277408)
chr8	26816801	26817430	Zfp703 (-160238)
chr9	94968879	94969689	Slc9a9 (+299375)
chrX	140505528	140506322	Prps1 (+49312)
chr6	6241749	6242630	Slc25a13 (-25017)
chr3	87767917	87768021	Pear1 (+974)
chr10	90308035	90308633	Anks1b (-268183)
chr1	115694912	115695345	Cntnap5a (+10373)
chr2	103582299	103582487	Abtb2 (+16083)
chr5	24602308	24602443	Smarcd3 (-364)
chr6	34575989	34576129	Cald1 (-22506)
chr19	40326083	40326591	Pdlim1 (-54721)
chr1	21305673	21306415	Khdc1a (-43597)
chr2	167860548	167861158	Ptpn1 (-71474)
chr4	40685432	40686273	Aptx (+17061)
chr9	44078671	44079624	Usp2 (+12127)
chr2	162853835	162854056	Srsf6 (-77582)
chr6	5509186	5510017	Pdk4 (-13293)
chr11	47988835	47989762	Sgcd (-609777)
chr11	22648179	22648434	Tmem17 (+136219)
chr2	73420008	73420153	Gpr155 (-33509)
chr12	76710315	76710753	Sptb (+13)
chr5	103629165	103629914	Slc10a6 (-137)
chr8	75456988	75457738	Iqcm (+8572)
chr9	48723228	48724428	Zbtb16 (+112117)
chr15	99713927	99715138	Gpd1 (-2982)
chr14	24617273	24618003	Rps24 (+126920)
chr19	6976038	6976647	Ppp1r14b (+1295)
chr1	78590298	78591121	Acsl3 (-67115)
chr7	89845826	89845941	Ccdc81 (+57734)
chr19	41703140	41703735	Slit1 (+40227)
chr11	102021236	102021360	Cd300lg (-20211)
chr13	55360629	55361169	Lman2 (+1884)
chr11	30517226	30517377	4930505A04Rik (-45494)
chrX	48407477	48407730	Elf4 (+46565)
chrX	139790552	139791259	Ripply1 (-8553)
chr1	96781128	96781280	Slco4c1 (+90967)
chr7	80134277	80135209	Idh2 (-19351)
chr16	24325423	24326679	Lpp (-67299)
chr16	4740230	4740429	Hmox2 (+13967)
chr15	77342972	77343429	Rbfox2 (-36148)
chr11	98754095	98754705	Thra (+12589)
chr10	26913088	26913444	Arhgap18 (+140789)
chr2	165936037	165936565	Ncoa3 (-56336)
chr5	64160846	64161005	Tbc1d1 (+1475)
chr5	121187229	121188400	Ptpn11 (+3514)
chr3	105020220	105021263	Cttnbp2nl (+32404)
chr17	51031488	51031703	Tbc1d5 (+147572)
chr6	118254738	118255541	Ret (-58007)
chr16	90829770	90830484	Eva1c (-986)
chr18	5159437	5159955	Zfp438 (+174743)
chr4	107745486	107746140	Lrp8 (-56600)
chr17	28442120	28442729	Fkbp5 (+75099)
chr8	123274250	123275018	Zfp276 (+20439)
chr4	119847339	119847992	Hivep3 (+33171)
chr7	95621830	95622043	Tenm4 (-589734)
chr3	21952696	21953339	Tbl1xr1 (-123634)
chr9	70902336	70902489	Lipc (+32395)
chr5	127528354	127528651	Slc15a4 (+88913)
chr14	55591449	55592052	Rnf31 (+43)
chr13	99100165	99100873	Zfp366 (-84304)
chr11	102509979	102510729	Itga2b (-40471)
chr11	28582152	28582413	Ccdc85a (+1712)
chr13	69863228	69863667	Med10 (+53607)
chr2	93619486	93619680	Alx4 (-22801)
chr15	43964190	43964564	Tmem74 (-94348)
chr6	99175340	99175940	Foxp1 (+259705)
chr7	16108551	16109416	Napa (+10526)
chr11	84330685	84331288	Acaca (+157865)
chr12	104826434	104826962	Clmn (+38311)
chr10	53549704	53550427	Asf1a (-46886)
chr1	125874392	125874672	Lypd1 (+37682)
chr2	151910327	151910604	Angpt4 (-744)
chr11	59960946	59961070	Rasd1 (+3936)
chr8	125722525	125723188	Ntpcr (-11346)
chr5	51591618	51592206	Ppargc1a (-37990)
chr18	61522430	61522879	Arhgef37 (+13881)
chr8	120251194	120251983	Fam92b (-74123)
chr14	62560173	62560301	Fam124a (+4500)
chr10	59982752	59983425	Anapc16 (+20022)
chrX	162347892	162347980	Nhs (-188206)
chr19	29028396	29028869	Ak3 (+19328)
chr6	140148083	140148673	Capza3 (+106821)
chr5	103856516	103857437	Klhl8 (+54282)
chr5	71970209	71971051	Commd8 (+197559)
chr15	81839294	81840314	Gm8444 (+3895)
chr8	123786011	123786718	Rab4a (-19620)
chr7	114817691	114817798	Insc (+71979)
chr4	145024799	145025552	Dhrs3 (+132099)
chr16	37869949	37870375	Lrrc58 (+1773)
chr7	80994486	80994827	Zfp592 (+976)
chr16	39149136	39149738	Igsf11 (+247121)
chr10	5415739	5415975	Syne1 (+134835)
chr3	141966169	141966590	Bmpr1b (+15884)
chr14	70336348	70336894	Slc39a14 (+14804)
chr16	4912836	4913611	Nudt16l1 (-25887)
chr1	23202289	23202930	4933415F23Rik (-100357)
chr17	29094165	29095221	Cdkn1a (+921)
chr10	78105231	78105335	Icosl (+35981)
chr12	70696805	70696930	Frmd6 (-128646)
chr15	83827979	83828299	Mpped1 (+43310)
chr13	96489148	96489281	Ankdd1b (-18055)
chr16	4652776	4653189	Vasn (+13042)
chr15	3232264	3232640	Selenop (-38469)
chr2	14204480	14204624	Mrc1 (-24840)
chr10	56754443	56755057	Gja1 (+375662)
chr7	35064819	35065485	Cebpg (-8579)
chr6	31370303	31370924	Mkln1 (-28121)
chr8	61275946	61276236	Sh3rf1 (+52219)
chr4	148513020	148513302	Angptl7 (-12701)
chr5	141115805	141116425	Card11 (-115533)
chr11	11844290	11845068	Fignl1 (-35717)
chr19	8714482	8715434	Slc3a2 (+8411)
chr5	64258519	64258640	Tbc1d1 (+99129)
chr3	10323036	10323544	Impa1 (+8149)
chr11	101441645	101442657	Rpl27 (-295)
chr8	83038610	83038904	Tbc1d9 (-127103)
chr3	96551304	96551838	Txnip (-6386)
chr2	25266556	25267678	Tprn (+4499)
chr3	61005198	61005496	P2ry1 (+2552)
chr9	48824875	48825065	Zbtb16 (+10975)
chr5	52224229	52224453	Dhx15 (-33827)
chr3	118140000	118140624	Snx7 (-271376)
chr2	66260142	66260349	Ttc21b (-3629)
chr16	38287671	38288381	Nr1i2 (+6798)
chr11	117554308	117554555	Gm11733 (+70064)
chr19	18993390	18993552	Rorb (+7646)
chr7	102357366	102357590	Rrm1 (-84217)
chr8	9394546	9395142	Fam155a (+376317)
chr11	57401477	57402115	Fam114a2 (+116807)
chr2	127514223	127514881	Kcnip3 (+6818)
chr7	63754881	63755854	E030018B13Rik (-161489)
chr11	29287272	29288775	Cfap36 (-40615)
chr10	100621445	100621612	1700017N19Rik (+29144)
chr2	24934533	24935249	Arrdc1 (+361)
chr6	59184925	59185749	Tigd2 (-23533)
chr1	104847969	104848111	Cdh20 (+79511)
chr2	65562405	65562545	Scn3a (+5152)
chr9	48736266	48737019	Zbtb16 (+99302)
chr15	39124986	39125663	Dcaf13 (+12460)
chr2	102142355	102142545	Ldlrad3 (+43935)
chrX	36320575	36320826	Lonrf3 (-7652)
chr4	41702859	41703436	Cntfr (-7706)
chr13	67022023	67022724	Zfp712 (+38796)
chr4	98166308	98166499	Tm2d1 (+216902)
chr6	47236589	47236884	Cul1 (-217583)
chr12	84956561	84956800	Fcf1 (-14216)
chr12	51002082	51002645	G2e3 (-345924)
chr5	128904932	128905104	Rimbp2 (-84996)
chr14	27187190	27187404	Arhgef3 (-50742)
chr4	130101219	130101736	Pef1 (-1080)
chr13	31585326	31585444	A530084C06Rik (-26052)
chr4	57302060	57302180	Ptpn3 (-283)
chr15	37164527	37164738	Grhl2 (-68403)
chr4	82458873	82459578	Nfib (+46082)
chr4	122958179	122959441	Mfsd2a (+2378)
chr10	91267802	91268401	Tmpo (-96524)
chr7	111263775	111264260	Eif4g2 (-180988)
chr2	168656639	168657415	Nfatc2 (-66767)
chr10	42250891	42251911	Foxo3 (+25351)
chr4	102273743	102273885	Pde4b (+18811)
chr18	73879902	73880385	Mro (+20757)
chr15	85456939	85457907	7530416G11Rik (+45804)
chr2	75311317	75311570	Hnrnpa3 (-347817)
chrX	11591696	11592230	H2al1j (+264141)
chr13	54629341	54629683	Faf2 (+7728)
chr4	123025574	123026063	Trit1 (+9222)
chr11	22273863	22274116	Ehbp1 (+12805)
chr1	56839613	56839938	Satb2 (+132082)
chr1	61540014	61540221	Pard3b (-98706)
chr2	59627939	59628680	Tanc1 (+16266)
chr4	10691681	10691881	2610301B20Rik (-182717)
chr15	76208107	76208537	Plec (-2001)
chr6	83137418	83138234	Rtkn (+2014)
chr2	145462305	145462641	Slc24a3 (+217501)
chr1	45856026	45856180	Gm5269 (+33975)
chr2	129419145	129419751	Il1b (-48309)
chr15	51231929	51232087	Trps1 (-342959)
chrX	140507758	140507879	Prps1 (+51206)
chr16	77808023	77808237	Gm11146 (-206036)
chr3	9756784	9757378	Pag1 (+76598)
chr14	76617570	76618472	Serp2 (-61334)
chr7	123109438	123110409	Tnrc6a (-14257)
chr9	111979920	111980101	Arpp21 (+207755)
chr11	52602043	52602563	Fstl4 (-162331)
chr17	80078877	80079359	Hnrnpll (-16891)
chr11	54833559	54834268	Lyrm7 (+26694)
chr12	17724097	17724360	Hpcal1 (+33373)
chr13	40928936	40929411	Gcnt2 (+69420)
chr13	103014370	103015369	Mast4 (+319590)
chr18	53288440	53288555	Snx24 (+42836)
chr5	77151067	77151653	Hopx (-36239)
chr2	104465561	104465680	Hipk3 (+28825)
chr4	152913112	152913324	Nphp4 (+435076)
chr7	117473242	117473880	Xylt1 (+92582)
chr6	124694043	124694789	Emg1 (+17762)
chr5	148609116	148609917	Ubl3 (-56855)
chr2	27420948	27421904	Vav2 (+5607)
chr5	129534102	129535017	Sfswap (+33339)
chr5	123050815	123051393	Morn3 (-4088)
chr15	97796967	97797461	Slc48a1 (+12859)
chr7	59080075	59080289	Ube3a (-148620)
chr4	6880996	6881202	Tox (+109700)
chr1	134056303	134056562	Fmod (+19179)
chr13	52113943	52114803	Gadd45g (+267695)
chr16	89607940	89608783	Krtap11-1 (-37179)
chr2	127462474	127462608	Fahd2a (-17991)
chr5	33015560	33015866	Ywhah (-3103)
chr2	32420477	32421285	Ptges2 (+24985)
chr14	99745143	99745408	Klf12 (+404488)
chr13	83433605	83433827	Mef2c (-90819)
chr16	4456190	4456835	Adcy9 (-36705)
chr3	156560547	156561344	Negr1 (-848)
chr9	77838776	77838939	Elovl5 (-78506)
chr13	52736107	52736746	Syk (+153254)
chr9	55259860	55260008	Nrg4 (+23691)
chr2	25852637	25852843	Sohlh1 (-5492)
chr5	112635626	112636219	Sez6l (-58948)
chr17	26509465	26509583	Dusp1 (-1005)
chr4	85227549	85227707	Sh3gl2 (+22187)
chr2	145849197	145849709	Naa20 (-53788)
chr16	23989766	23990359	Bcl6 (-1211)
chrX	77409180	77409906	Tbl1x (-101470)
chr13	99254074	99254657	Zfp366 (+69543)
chr3	57950827	57951773	Pfn2 (-103221)
chr6	119302531	119303038	Lrtm2 (+27981)
chr10	60109983	60110109	Spock2 (+3827)
chr9	79976660	79977334	Filip1 (+807)
chr7	63462637	63463005	Otud7a (+18070)
chr11	87385621	87386065	Rad51c (+19111)
chr13	97565995	97566695	Gm10260 (+194287)
chr4	34237342	34238398	Spaca1 (-187679)
chr7	25390123	25390742	Lipe (+5946)
chr19	5661191	5661763	Sipa1 (+2230)
chr6	22919415	22919966	Ptprz1 (+44189)
chr19	4493021	4493310	2010003K11Rik (+5417)
chr17	31371187	31371356	Pde9a (-14962)
chr7	58722226	58722337	Atp10a (+64036)
chr16	94905901	94906505	Kcnj6 (+91493)
chr17	89655697	89655806	Gm10184 (+254697)
chr2	137098703	137098839	Jag1 (+17873)
chr1	30718273	30718655	Phf3 (+155117)
chr11	50471954	50472361	Rufy1 (-41033)
chr15	97667466	97667862	Rpap3 (+38158)
chr16	31199266	31199830	Acap2 (+1690)
chr15	8642190	8642706	Slc1a3 (+68316)
chr2	109677775	109678412	Bdnf (+3394)
chr9	120398008	120398792	Eif1b (-94091)
chr10	42231115	42231725	Foxo3 (+45332)
chr12	104899903	104900065	Clmn (-34975)
chr4	97869225	97869821	E130114P18Rik (-91475)
chr8	83900671	83900804	Adgrl1 (+633)
chr18	73730052	73730311	Elac1 (+24297)
chr10	14530808	14531459	Adgrg6 (+13902)
chr12	74458381	74459248	Gm11042 (-142421)
chr17	10492834	10493592	Qk (-173852)
chr4	152642023	152642777	Nphp4 (+164258)
chr10	125989671	125990415	Lrig3 (+23790)
chrX	167934585	167934839	Prps2 (-551963)
chr8	124533985	124534126	Cog2 (+13289)
chr6	18153114	18153435	Cftr (-17412)
chr2	157940709	157941192	Vstm2l (+26298)
chr17	33524063	33524676	Adamts10 (+166)
chr12	77857182	77857856	Gm6657 (-336723)
chr2	168402794	168403510	Kcng1 (-122020)
chr10	20202606	20203367	Map7 (+54003)
chr2	157870411	157870634	Vstm2l (-44130)
chr5	74201309	74201492	Rasl11b (+6115)
chr10	78261401	78261633	Trappc10 (-16876)
chr9	52323094	52323642	Zc3h12c (-155257)
chr8	77444090	77444692	Arhgap10 (+73562)
chr1	25775695	25776263	Adgrb3 (+53728)
chr19	53414981	53415696	Smndc1 (-24766)
chr2	127379365	127379507	Adra2b (+16150)
chr1	91436131	91436815	Per2 (+22851)
chr2	167844403	167845345	Ptpn1 (-87453)
chr5	148398880	148399420	Slc7a1 (+754)
chr16	28829382	28830402	Mb21d2 (+99806)
chr6	55376156	55376253	Ghrhr (-138)
chr8	121862177	121862377	Klhdc4 (-32708)
chr14	12504550	12504937	Fezf2 (-158900)
chr4	123046285	123046744	Trit1 (+29918)
chr11	54836035	54836736	Lyrm7 (+24222)
chr10	127141077	127141203	Os9 (-20009)
chr5	134098995	134099505	Gatsl2 (-461)
chr6	88133748	88134386	Rpn1 (+49585)
chr4	149648600	149648697	Pik3cd (+50059)
chr6	54591726	54592199	Fkbp14 (+1214)
chr7	25781070	25781762	Axl (+7271)
chr14	51913832	51914651	Ndrg2 (-754)
chr1	154156599	154157790	Zfp648 (-43992)
chr11	83389713	83402571	Rasl10b (-13930)
chr12	117817119	117817247	Cdca7l (-26332)
chr4	70499141	70499831	Megf9 (+35442)
chr4	119001504	119001677	Lao1 (+40013)
chr7	113334135	113334270	Btbd10 (+35136)
chr1	74211241	74211386	Cxcr1 (-18079)
chr10	108518872	108519395	Gm5136 (+181026)
chr12	76883607	76884519	Fntb (+46649)
chr18	66246678	66246832	Ccbe1 (+45083)
chr12	25412364	25412901	Id2 (-315493)
chr9	81633413	81633831	Htr1b (+206)
chr13	57684884	57685653	Spock1 (+223006)
chr9	75597497	75598246	Tmod2 (+13453)
chr11	51915765	51916694	Cdkn2aipnl (-51431)
chr6	126585467	126586270	Kcna5 (-50457)
chr5	136480674	136480806	Cux1 (+86506)
chr15	6923336	6923503	Osmr (-48451)
chr9	104035466	104036061	Uba5 (+27370)
chr9	120144169	120145002	Mobp (-5121)
chr3	100225453	100225722	Wdr3 (-63181)
chr1	25008454	25009024	Lmbrd1 (+330109)
chr8	17095791	17097173	Csmd1 (+438799)
chr8	121856627	121856868	Klhdc4 (-27179)
chr18	4209832	4210374	Lyzl1 (+44271)
chr12	85532404	85533003	Fos (+58814)
chr13	96368088	96368349	Poc5 (-20075)
chr2	21053439	21054051	Arhgap21 (-86024)
chr19	6382384	6382977	Pygm (-1718)
chr12	16630295	16631021	Ntsr2 (-22826)
chr14	30698809	30699408	Sfmbt1 (-16506)
chr16	39698404	39698561	Igsf11 (+796167)
chr5	35280196	35280885	Adra2c (+2222)
chr7	122818463	122818580	Cacng3 (+148030)
chr11	81516376	81516468	5530401A14Rik (-344257)
chr10	83096454	83096617	Chst11 (+111038)
chr4	40047971	40048522	Aco1 (-94834)
chr6	72276954	72277404	Atoh8 (-41602)
chr11	103358308	103358820	Arhgap27 (+2336)
chr11	106160832	106161642	Gm10840 (+387)
chr4	107367913	107368140	Ndc1 (+243)
chr17	73756223	73756410	Galnt14 (-45866)
chr6	136339667	136340211	Gm8994 (+12400)
chr5	30738133	30738351	Dpysl5 (+26678)
chr16	22704706	22704884	Dgkg (-47622)
chrX	7474114	7475261	Usp27x (-98862)
chr5	129465676	129465790	Sfswap (-35488)
chr8	126118426	126118583	Kcnk1 (+123335)
chr10	17366969	17367461	Cited2 (-356018)
chr1	67745913	67747581	Cps1 (+623721)
chr12	82075698	82076370	Sipa1l1 (-93386)
chr10	7265054	7265225	Cnksr3 (-52903)
chr6	108093466	108093830	Setmar (+28603)
chr19	33079951	33080385	Rnls (+312097)
chr2	104121824	104122296	A930018P22Rik (-709)
chr2	26555025	26555710	Egfl7 (-25688)
chr13	113844465	113845223	Arl15 (+50339)
chr2	121555446	121555586	Wdr76 (+48733)
chr9	59584951	59585368	Celf6 (+6823)
chr9	37358540	37359235	Hepacam (-8463)
chrX	36823678	36824331	Slc25a5 (+28354)
chr12	32616171	32616388	Nampt (-204055)
chr10	108762230	108762543	Gm5136 (-62227)
chr14	34565681	34566208	Ldb3 (+22736)
chr10	95234468	95234963	Cradd (+89392)
chr13	99676266	99676917	Map1b (-160052)
chr4	138553419	138554103	Vwa5b1 (+70251)
chr4	59662142	59662540	E130308A19Rik (+36098)
chr17	84176249	84176919	Zfp36l2 (+11363)
chr11	83535680	83535839	Ccl5 (-5242)
chr5	149617964	149618442	Hsph1 (+18135)
chr6	31938303	31938987	1700012A03Rik (-111640)
chr7	130953034	130954015	Htra1 (+17322)
chr6	8694088	8694356	Ica1 (+84262)
chr16	34952143	34952511	Hacd2 (-70094)
chr3	110494462	110494690	Prmt6 (-243583)
chr9	27766293	27766850	Opcml (-24375)
chr19	56742583	56742687	Adrb1 (+20263)
chr2	167950554	167951199	Ptpn1 (+18550)
chr11	6259064	6259167	Ddx56 (+8656)
chr11	57603725	57603845	Galnt10 (-41657)
chr12	85465032	85465180	Fos (-8784)
chr6	53804354	53804553	Tril (+16376)
chr18	57534686	57535376	1700011I03Rik (+1251)
chr3	86811065	86811269	Dclk2 (+109685)
chr4	56533403	56533574	Actl7b (+207954)
chr2	139653202	139653400	Ism1 (-24877)
chr4	117641142	117641757	Dmap1 (+40823)
chr13	12195868	12196642	Mtr (+61840)
chr1	39759883	39760043	Rfx8 (-38966)
chr11	102382073	102382200	Rundc3a (-11266)
chr1	161269530	161269809	Prdx6 (-18451)
chr11	90378272	90379116	Hlf (+12201)
chr7	113106101	113106755	Arntl (-101129)
chr12	102202868	102203494	Slc24a4 (+74007)
chr7	126676040	126676824	Sult1a1 (-75)
chr11	64650054	64650734	Hs3st3a1 (+215062)
chr4	83020868	83021022	Frem1 (+157)
chr4	145281153	145281325	Tnfrsf8 (+33908)
chr5	5689230	5689344	Steap2 (+5291)
chrX	152710576	152711194	Shroom2 (+58576)
chr8	122233694	122234641	Zfpm1 (-47973)
chr13	59677292	59677483	Golm1 (-1577)
chr1	193539388	193539850	Camk1g (-169321)
chr2	93383731	93384365	Tspan18 (-49561)
chrX	100599642	100600220	P2ry4 (-5062)
chr18	37805938	37806649	Pcdhgc3 (-116)
chr16	4472394	4473205	Srl (+50275)
chr9	103076536	103077305	Rab6b (-34886)
chr1	74459135	74459300	Cnot9 (-46840)
chr7	81072606	81072769	Alpk3 (+15088)
chr17	15632186	15632371	Prdm9 (-68956)
chr9	116408092	116408477	Tgfbr2 (-233020)
chr8	31378944	31379555	Fut10 (+191903)
chr16	18083250	18084047	Prodh (+5643)
chrX	10063679	10064316	Srpx (+53684)
chr7	82743255	82743878	Efl1 (+94926)
chr14	47911551	47911978	Peli2 (-209104)
chr1	195017114	195017673	Cd46 (+74855)
chr4	124593297	124593750	3100002H09Rik (+17279)
chr12	74075128	74075227	Syt16 (+77517)
chr5	129299253	129299445	Sfswap (-201872)
chr19	50643370	50643923	Sorcs1 (+34999)
chr11	30118499	30119082	Eml6 (-92758)
chr18	39024895	39025368	Arhgap26 (+31987)
chr6	86102825	86103479	Add2 (+74448)
chr6	88647793	88648434	Kbtbd12 (-20672)
chr13	106746723	106747088	Ipo11 (+190052)
chr12	51090717	51091000	G2e3 (-257429)
chr6	31285082	31285771	Mkln1 (-113308)
chr19	45507380	45508085	Poll (+52798)
chr4	108071054	108071893	Podn (-39384)
chr11	68330454	68330857	Ntn1 (+70167)
chr11	118345855	118346216	Cep295nl (-3536)
chr9	61215055	61215715	Tle3 (-158000)
chr19	3439049	3439741	Gal (-24923)
chr8	94118636	94119753	Mt4 (-18002)
chr15	76783550	76784347	Arhgap39 (+34134)
chr15	34082375	34083222	Mtdh (+80)
chr2	30671243	30672165	Cstad (+76664)
chr2	30265605	30266604	Phyhd1 (-424)
chr17	28478125	28478286	Fkbp5 (+39318)
chr9	32223520	32223769	Arhgap32 (+107509)
chr7	17058111	17058509	Hif3a (+4117)
chr17	26621170	26621668	Atp6v0e (-54993)
chr7	141455895	141456503	Pnpla2 (+1001)
chr10	128179921	128180514	Rbms2 (-3739)
chr16	35768704	35768822	Dirc2 (+593)
chr1	181488845	181489005	Ccdc121 (+22526)
chr18	62142629	62142834	Adrb2 (+37227)
chr11	115244548	115244709	Grin2c (+22614)
chr4	155251390	155251763	Faap20 (+1611)
chr8	126683018	126683584	Irf2bp2 (-89315)
chr6	118341816	118342482	Bms1 (+77325)
chr8	84659884	84660308	Ier2 (+2756)
chr18	48334896	48335313	Eno1b (+289770)
chr4	97990499	97990890	E130114P18Rik (-212647)
chr3	62339010	62339210	Arhgef26 (+766)
chr9	66498342	66498446	Fbxl22 (+16199)
chr13	104062328	104062762	Nln (+47069)
chr10	69690473	69691107	Ank3 (+157018)
chr8	126074729	126075317	Kcnk1 (+79853)
chr17	52196988	52197191	Satb1 (-364418)
chr9	44226214	44226395	Cbl (+7744)
chrX	103549823	103549955	Zcchc13 (-80697)
chr17	82726234	82726363	Gm6594 (+187041)
chr15	78635122	78635468	Cyth4 (+38248)
chr4	106121343	106121510	Usp24 (-194807)
chr9	40799783	40799949	Hspa8 (-1118)
chr13	48126740	48126931	Id4 (-134392)
chr11	51293612	51293924	Col23a1 (+3848)
chr3	22077936	22078570	Tbl1xr1 (+1601)
chr17	28484681	28485224	Fkbp5 (+32571)
chr16	38982647	38982776	Igsf11 (+80396)
chr9	71609714	71610072	Myzap (-17533)
chr10	12548734	12548918	Utrn (+312909)
chr10	16341542	16341807	NONE
chr9	49504826	49505339	Ttc12 (-18858)
chr15	87584138	87584839	Fam19a5 (-40741)
chr9	48442721	48443478	Rexo2 (+37511)
chr12	88839594	88840198	Nrxn3 (+45392)
chr7	79742349	79742465	Pex11a (+673)
chr13	44100531	44101238	Cd83 (+316110)
chr9	28331708	28331852	Opcml (+540833)
chr3	108722632	108722817	Gpsm2 (-416)
chr13	59853503	59853627	Zcchc6 (-30418)
chr13	5604288	5604429	Klf6 (-257123)
chr6	141332674	141332863	Pde3a (+83500)
chr2	42268031	42268592	Lrp1b (+385312)
chr12	102668220	102668626	Itpk1 (+36507)
chr16	15889570	15890154	Cebpd (+2576)
chr14	64616098	64616555	Kif13b (-36204)
chr4	11123542	11124134	Trp53inp1 (-32593)
chr10	16803833	16804502	Cited2 (-919065)
chr3	138858998	138859748	Tspan5 (+117178)
chr5	135280198	135280693	Fzd9 (-29216)
chr11	101230810	101231572	Ezh1 (-4741)
chr16	32130283	32130531	Cep19 (+30607)
chr9	54828070	54828212	Ireb2 (-35648)
chr14	25516128	25516297	Zmiz1 (+56989)
chr3	84259782	84259914	Trim2 (+10943)
chr4	150785341	150785490	Errfi1 (-69657)
chr8	70130572	70130795	Nr2c2ap (-663)
chr3	97933323	97933582	Sec22b (+32263)
chr10	3940996	3941743	Mthfd1l (-31761)
chr15	40121560	40121761	9330182O14Rik (-20527)
chr4	118147445	118148124	St3gal3 (-12895)
chr18	13007960	13008133	Hrh4 (+1057)
chr1	189960481	189960935	Smyd2 (-38345)
chr1	44173232	44173512	Ercc5 (+25525)
chr3	89393887	89394243	Zbtb7b (-6394)
chr15	98402883	98403234	Olfr283 (-22113)
chr2	114255252	114255871	Zfp770 (-54093)
chr8	123964564	123964762	Nup133 (-15398)
chr14	76931405	76931547	Lacc1 (+105165)
chr1	77545148	77545292	Epha4 (-30132)
chr9	44127669	44127894	Mcam (-6780)
chr11	60899265	60899469	Natd1 (+14445)
chr8	47673821	47674370	Ing2 (+1062)
chr11	113801643	113801934	Cdc42ep4 (-50471)
chr1	118693145	118693602	Tfcp2l1 (+65428)
chr3	146892142	146892706	Ttll7 (+40057)
chr14	62197085	62197813	Dleu7 (+95514)
chr16	98022427	98023181	B230307C23Rik (+25481)
chr11	19713168	19713323	Spred2 (-211196)
chr4	69838772	69838900	Cdk5rap2 (+571607)
chr18	13601541	13601738	Zfp521 (+371093)
chr8	117198435	117198839	Gan (+40502)
chr10	95193989	95194526	Cradd (+129850)
chr1	55224002	55224550	Rftn2 (+2506)
chr3	40087984	40088377	Intu (-452586)
chr10	59969516	59970671	Ddit4 (-18260)
chr9	68727385	68727511	Rora (+73662)
chr6	71622084	71622367	Kdm3a (+10460)
chr9	25495556	25495897	Eepd1 (+14180)
chr8	124574130	124574274	Capn9 (-1909)
chr7	96679902	96680085	Nars2 (-271511)
chr14	24902812	24903190	Rps24 (+412283)
chr15	12243742	12244246	Mtmr12 (+38966)
chr9	108754343	108754900	Ip6k2 (-41372)
chr17	70488709	70489422	Dlgap1 (+64272)
chr15	88850147	88851267	Pim3 (-11479)
chr8	72318141	72319174	Klf2 (-375)
chr1	151921300	151921528	Edem3 (+166040)
chr19	10096662	10096833	Fads2 (+4755)
chr14	109173716	109173901	Slitrk1 (-259570)
chr12	79035458	79035630	Plekhh1 (+6381)
chr5	5380977	5381511	Cdk14 (-1047)
chr1	23765115	23765693	B3gat2 (+3478)
chr12	85195052	85195683	Pgf (-18072)
chr11	98270404	98271383	Neurod2 (+58754)
chr19	58260790	58261444	Gfra1 (+194281)
chr1	85827302	85827413	Cab39 (+33917)
chr12	16618329	16618787	Lpin1 (-28788)
chr12	74230652	74231285	Gm11042 (+85425)
chr2	157172565	157173237	Rbl1 (+31611)
chr6	73320816	73321138	Suclg1 (+72595)
chr14	29847396	29848171	Selenok (-120524)
chr12	108309316	108310173	Hhipl1 (+3475)
chr1	153901251	153901928	Glul (+1646)
chr14	8309510	8310589	Fam107a (-273)
chr7	64619675	64620428	Apba2 (+118346)
chr13	54165556	54166330	Hrh2 (-26186)
chr6	3567143	3567324	Vps50 (+68852)
chr4	135839046	135839164	Srsf10 (-16642)
chr14	55092879	55093079	Zfhx2 (-655)
chr2	26109924	26110092	Nacc2 (-17831)
chr15	42952052	42952211	Rspo2 (+218686)
chr13	30668394	30668619	Dusp22 (+8406)
chr7	135608348	135608518	Ptpre (+70594)
chr7	133019112	133019661	Ctbp2 (-4139)
chr2	45019683	45020280	Zeb2 (+97413)
chr5	25752703	25753312	Actr3b (-7018)
chr6	91606427	91607147	Slc6a6 (-77266)
chr11	110448644	110449250	Map2k6 (+49825)
chr8	119675269	119675502	Wfdc1 (+9021)
chr10	61029002	61029252	Pcbd1 (-60232)
chr5	113011502	113011770	Grk3 (+3878)
chr10	9342512	9343083	Samd5 (+332410)
chr5	3502596	3502774	Fam133b (-41153)
chr11	55009702	55009910	Anxa6 (+23639)
chr11	17161611	17161845	Ppp3r1 (+2465)
chr16	7926436	7926733	Tmem114 (+498551)
chr17	51204555	51205191	Tbc1d5 (-25705)
chr11	79182752	79183349	Ksr1 (-36644)
chr6	92787005	92787864	A730049H05Rik (-29043)
chr18	60780082	60780846	Rps14 (+5954)
chr17	28516084	28516218	Fkbp5 (+1373)
chr13	119791904	119792041	Zfp131 (-1084)
chr7	123046987	123047148	Rbbp6 (+76504)
chr13	118572410	118572540	Fgf10 (-142224)
chr19	50857139	50857403	Sorcs1 (-178625)
chr4	155192228	155192818	Ski (+30069)
chr18	78212683	78213276	Slc14a2 (-3886)
chr14	77338321	77339026	Enox1 (+181911)
chr9	40241349	40242104	Scn3b (-27490)
chr6	84692148	84692352	Cyp26b1 (-103612)
chr13	109577970	109578221	Rab3c (+702054)
chr4	33195063	33195406	Pm20d2 (-5802)
chr2	21002978	21003450	Arhgap21 (-35493)
chr2	8660569	8660733	NONE
chr18	41241363	41241506	Prelid2 (+709759)
chr2	132620240	132620391	Gpcpd1 (-42068)
chr12	80945356	80945535	Srsf5 (-86)
chr10	90881962	90882865	Apaf1 (+200356)
chr13	60727521	60728139	BC051665 (+58534)
chr6	72872515	72873380	Kcmf1 (+27031)
chr2	120605232	120607984	Lrrc57 (+2747)
chr11	28422787	28423251	Ccdc85a (+160976)
chr17	86811941	86812489	Epas1 (+58308)
chr19	50674763	50675320	Sorcs1 (+3604)
chr5	34259984	34260945	Zfyve28 (+27861)
chr11	87462028	87471583	Tex14 (+61741)
chr15	93706537	93706667	Prickle1 (-187079)
chr17	86504987	86505555	Gm10309 (-39)
chr16	30984834	30985833	Xxylt1 (+96098)
chr18	66132515	66132674	Lman1 (-129958)
chr4	25269024	25269147	Ufl1 (+12735)
chr3	105609247	105609361	Ddx20 (+78270)
chr1	53734176	53734552	Dnah7a (-27603)
chr5	68087243	68087484	Grxcr1 (+55529)
chr6	87170797	87171086	D6Ertd527e (+66194)
chr18	38973276	38973812	Arhgap26 (-19601)
chr10	87447530	87447653	Ascl1 (+46068)
chr4	62440285	62441150	Rnf183 (-5466)
chr14	73503545	73504009	Med4 (-6272)
chr7	41632617	41633578	Zfp788 (-433)
chr6	55443854	55444072	Adcyap1r1 (-8015)
chr17	30008765	30008949	Zfand3 (+3770)
chr14	76708608	76709022	Serp2 (-152128)
chr9	98577326	98577852	Copb2 (+13858)
chr12	79103669	79104308	Pigh (-14338)
chr7	100705842	100706654	Fam168a (-454)
chr7	16003989	16004627	Ehd2 (-36741)
chr9	50118473	50119172	Rpl10-ps3 (+226145)
chr16	23195999	23196548	St6gal1 (-28466)
chr14	121882858	121882978	Ubac2 (+4312)
chr12	102516175	102516558	Chga (-38602)
chr7	37522202	37522387	Zfp536 (+247667)
chr7	72572161	72572462	Mctp2 (-265704)
chr14	76221437	76221932	Rps2-ps6 (+15668)
chr15	86263757	86264327	Tbc1d22a (+49583)
chr12	70059398	70059971	Nin (+54032)
chr1	9851210	9851972	Sgk3 (+53448)
chr13	99487680	99488507	Map1b (+28446)
chr5	125165122	125165245	Ncor2 (+13869)
chr2	92617227	92617480	Chst1 (+17647)
chr1	153265486	153266001	Lamc1 (+67042)
chr13	46042881	46043449	Atxn1 (-78188)
chr8	123762674	123762795	Rab4a (-43250)
chr3	100632111	100632216	Man1a2 (+53339)
chr7	119850822	119851087	Dcun1d3 (+44790)
chr3	87634931	87635123	Arhgef11 (+17452)
chr5	101937375	101937821	Wdfy3 (+132323)
chr2	13578383	13578843	Vim (+4661)
chr9	63059320	63059863	Pias1 (-78713)
chr4	89421817	89422432	Cdkn2b (-111093)
chr11	119532380	119533019	Nptx1 (+15053)
chr2	27046150	27046897	Slc2a6 (-18526)
chr9	60129489	60130339	Nr2e3 (-179797)
chr2	92435176	92435341	Cry2 (-1216)
chr4	135447729	135447897	Rcan3 (-13960)
chr18	6734329	6734440	Rab18 (-30820)
chr9	62506465	62506793	Coro2b (+30415)
chr6	113311426	113311558	Brpf1 (+4300)
chr1	150987280	150987495	Hmcn1 (+5663)
chr11	48605363	48605565	Rack1 (-194896)
chr14	59548963	59549656	Cdadc1 (+48629)
chr15	31588126	31588980	Cct5 (+13294)
chr15	3709331	3709498	Ghr (-126185)
chr9	92132417	92132545	Plscr5 (-60455)
chr1	184877771	184878019	C130074G19Rik (+5323)
chr8	125971224	125971578	Kcnk1 (-23769)
chr5	142880120	142880775	Fbxl18 (+14790)
chr2	178305246	178306036	Sycp2 (+102044)
chr4	83215612	83216182	Ttc39b (+108358)
chr17	30580967	30581787	Btbd9 (-5090)
chr15	99352480	99352740	Fmnl3 (+17872)
chr2	166100797	166101241	Sulf2 (+54644)
chr1	135347385	135348160	Lmod1 (+22966)
chr13	20228197	20229068	Elmo1 (+138014)
chr6	54439952	54440730	Wipf3 (+10738)
chr9	98018496	98019294	Clstn2 (+14286)
chr3	127130308	127130413	Ank2 (+278698)
chr12	85612066	85612406	Jdp2 (+13209)
chr11	46383916	46384420	Itk (+5325)
chr2	139334603	139335163	Sptlc3 (-159037)
chr5	97700449	97701110	Gk2 (-243759)
chr6	126217033	126217649	Ntf3 (-50626)
chr18	6979375	6979519	Mkx (+25333)
chr10	14332511	14332680	Adgrg6 (+212440)
chr9	78022123	78022575	Gcm1 (-29575)
chr8	125133856	125134170	Disc1 (+79818)
chr6	57707249	57707424	Lancl2 (+4701)
chr4	110199791	110199915	Elavl4 (+87036)
chr4	62521971	62522450	Alad (-2317)
chr14	21537954	21538101	Kat6b (+38243)
chr9	95473634	95473823	U2surp (+38165)
chr19	43524629	43525275	Got1 (-347)
chr4	149889545	149890539	Spsb1 (+65001)
chr11	66578027	66578162	Shisa6 (-52131)
chr14	11664715	11665211	Ptprg (+111431)
chr9	52359837	52360007	Zc3h12c (-191811)
chr14	22804601	22805012	Lrmda (+785095)
chr4	136140479	136141044	Id3 (-2735)
chr19	22583620	22584205	Trpm3 (+444794)
chr4	56658788	56659160	Actl7b (+82469)
chr10	41893435	41894267	Sesn1 (+83916)
chr15	96527659	96528358	Scaf11 (-67166)
chr9	37031399	37031953	Pknox2 (+115731)
chr6	24713443	24713648	Hyal6 (-19699)
chr1	192678192	192678372	Hhat (+92941)
chr1	180568347	180568528	Parp1 (-491)
chr4	86712669	86713200	Plin2 (-42875)
chr5	137671752	137672182	Agfg2 (+12713)
chr11	94161300	94161806	Tob1 (-49901)
chr9	42053421	42054090	Sorl1 (+70541)
chr6	113965602	113966058	Atp2b2 (-31149)
chr2	161177631	161178295	Chd6 (-68941)
chr13	26464256	26465136	Hdgfl1 (+305469)
chr5	52778848	52779124	Zcchc4 (-4068)
chr2	145801417	145801635	Rin2 (+15410)
chr7	139484401	139484723	Inpp5a (+95452)
chr17	28444918	28445296	Fkbp5 (+72417)
chr14	71103839	71104389	Gfra2 (+213984)
chr4	119150548	119150995	Zfp691 (+23084)
chr9	109899656	109900192	Cdc25a (+24345)
chr11	8496674	8497681	Tns3 (+167357)
chr6	126535534	126535784	Kcna5 (-247)
chr10	41118365	41118496	Gpr6 (-46146)
chr8	120300523	120300955	Fam92b (-123273)
chr7	25280116	25280525	Cic (+12617)
chr19	49629925	49630504	Rpl13a-ps1 (+400520)
chr10	128727706	128728236	Dgka (+16104)
chr17	27772801	27773229	Spdef (-44065)
chr15	29774610	29775320	Ctnnd2 (-397628)
chr11	72566464	72567404	Spns3 (-16428)
chr5	122314703	122315702	Pptc7 (+30838)
chr3	108295004	108296079	Sort1 (+11460)
chr7	67884474	67884623	Igf1r (-68278)
chr4	149979292	149980306	Spsb1 (-24756)
chr6	127405689	127405888	Parp11 (-47934)
chr7	99962871	99963291	Rnf169 (+17367)
chr4	119076747	119077079	Slc2a1 (-31798)
chr18	53253499	53254236	Snx24 (+8206)
chr14	25529253	25530099	Zmiz1 (+70452)
chr17	28308268	28308683	Fance (-5168)
chr16	34909455	34909634	Hacd2 (-112876)
chr2	48703181	48703558	Acvr2a (-110739)
chr6	96222452	96222953	1700123L14Rik (-56460)
chr12	86932037	86932753	Cipc (-14948)
chr9	57017289	57017844	Ptpn9 (+22644)
chr10	60298858	60299078	Psap (+21340)
chr2	7036874	7036996	Celf2 (-151939)
chr5	43845239	43845627	Cd38 (-23120)
chr1	76070735	76071257	Slc4a3 (+524730)
chr18	52869765	52870287	Sncaip (+102316)
chr7	29411025	29411593	Sipa1l3 (+94151)
chr6	31917532	31918240	1700012A03Rik (-132399)
chr14	101931410	101931638	Lmo7 (+201567)
chr12	104838048	104838394	Clmn (+26788)
chr7	99541050	99542244	Arrb1 (+6181)
chr10	90806332	90806864	Anks1b (+230081)
chr5	122308151	122308317	Pptc7 (+23869)
chr14	79274011	79274396	Zfp957 (-26908)
chr2	3675213	3675736	Fam107b (-37983)
chr2	63061622	63062259	Kcnh7 (+122337)
chr13	32236164	32236816	Gmds (+102250)
chr11	45594411	45595050	Clint1 (-257320)
chr12	21439368	21442729	Ywhaq (-23613)
chr15	100791573	100791845	Slc4a8 (+29962)
chr12	5226864	5227137	Klhl29 (+148681)
chr17	43257764	43258202	Adgrf1 (-12346)
chr15	98524316	98524593	Kansl2 (+9766)
chr17	33812900	33813446	Kank3 (+2653)
chr4	135286761	135287366	Clic4 (-14250)
chr11	121258996	121259592	Foxk2 (-696)
chr9	35058874	35059500	St3gal4 (+57686)
chr6	31148057	31148731	Klf14 (-189316)
chr14	102800109	102800234	Kctd12 (+182465)
chr8	47244766	47244954	Stox2 (+44542)
chr4	105175132	105175503	Plpp3 (+17971)
chr5	132645054	132645698	NONE
chr11	98747726	98748247	Thra (+6176)
chr4	82246155	82246737	Nfib (+258862)
chr12	99036369	99037029	Ttc8 (+116087)
chr7	124680958	124681837	Hs3st4 (+698529)
chr11	52037163	52037236	Cdkl3 (+32910)
chr5	92595342	92595556	Stbd1 (-7602)
chr17	71140467	71140632	Lpin2 (-64126)
chr9	66305444	66305734	Herc1 (-44937)
chr13	116173901	116174010	Isl1 (+135733)
chr11	35699005	35699214	Pank3 (-70374)
chr2	158117318	158117854	Tgm2 (+28850)
chr8	87938407	87938793	Zfp423 (+20995)
chr2	92490377	92491085	Slc35c1 (-30937)
chr17	44618115	44618424	Supt3 (-158882)
chr11	109822197	109822804	1700012B07Rik (+5545)
chr1	51690699	51691342	Nabp1 (-212622)
chr4	23826726	23827416	Mms22l (-669380)
chr15	36472197	36472778	Ankrd46 (+24303)
chr16	43626128	43626274	Tigit (+37983)
chr6	112972877	112973015	Srgap3 (-25680)
chr10	94572688	94573220	Tmcc3 (+58097)
chr19	56585792	56586310	Nhlrc2 (+37790)
chr17	47493262	47493707	Taf8 (+8802)
chrX	73674231	73674947	Slc6a8 (+1439)
chr15	101308405	101308891	Atg101 (+24347)
chr8	35583393	35584167	Mfhas1 (-4018)
chr8	124621435	124621712	2310022B05Rik (+41795)
chr7	130681990	130682560	Btbd16 (-91794)
chr3	96556782	96558169	Txnip (-481)
chr7	124064969	124065080	Hs3st4 (+82156)
chr3	19566132	19566543	Dnajc5b (+35667)
chr7	96145695	96146106	Tenm4 (-65770)
chr2	131822958	131823490	Erv3 (+36523)
chr17	25592231	25592871	Lmf1 (+13374)
chr12	29629945	29630606	Myt1l (+101892)
chr1	133222618	133223310	Plekha6 (-23142)
chr6	125247921	125248738	Cd27 (-11320)
chr2	146268736	146269509	Insm1 (+47202)
chr12	55491441	55492458	Nfkbia (+697)
chr7	137518005	137518203	Glrx3 (+80490)
chr6	134513150	134513505	Lrp6 (+53585)
chr19	29861309	29862808	Ranbp6 (-49085)
chr6	136161572	136162092	Grin2b (+11293)
chr8	70931869	70932516	Map1s (+26261)
chr2	90504563	90505307	Ptprj (+75712)
chr14	45309491	45310117	Ero1l (+8768)
chr9	62360296	62360781	Anp32a (+19210)
chr2	131508294	131509178	Smox (+16793)
chr5	131677350	131678095	Auts2 (-200699)
chr9	22374945	22376615	Anln (+13408)
chr5	122394991	122396762	Arpc3 (+3999)
chr2	79675378	79675537	Ppp1r1c (-32322)
chr19	5912650	5913089	Dpf2 (-78)
chr2	178283372	178283729	Phactr3 (+108202)
chr5	100636869	100637906	Coq2 (+36896)
chr12	8428531	8429302	Rhob (+71092)
chr8	94189144	94189935	Mt1 (+10458)
chr13	55697471	55697635	B230219D22Rik (+4429)
chr10	60594948	60595620	Cdh23 (+101206)
chr13	91874316	91875084	Ckmt2 (+2185)
chr2	91140928	91141625	Mybpc3 (+23133)
chr16	93932572	93932839	Chaf1b (+48805)
chr8	106695851	106696130	Tango6 (+12923)
chr4	120148509	120149195	Edn2 (-12354)
chr16	40168030	40168662	NONE
chr8	18620833	18621479	Mcph1 (+26025)
chr1	134275934	134276640	Myog (-13702)
chr7	34384482	34384699	Lsm14a (+5096)
chr3	90557511	90557609	S100a16 (+20306)
chr5	149373261	149373418	Medag (-38409)
chr4	45156526	45156901	Frmpd1 (-47211)
chr2	145799044	145799436	Rin2 (+13124)
chr13	73693189	73693815	Slc6a19 (+7278)
chr15	82378371	82379022	Cyp2d22 (+1563)
chr12	25150389	25151042	Id2 (-53576)
chr17	31223050	31223196	Ubash3a (+15250)
chr8	90869247	90870074	Chd9 (+40826)
chr2	50121351	50121825	Lypd6 (+55124)
chr10	22000042	22000372	4930444G20Rik (+67872)
chr5	51306436	51307413	Ppargc1a (+246997)
chr12	55398363	55399246	Psma6 (+30)
chr13	52072266	52072438	Gadd45g (+225674)
chr4	154160158	154160773	Tprgl (+200)
chr3	122992788	122993531	Usp53 (-8650)
chr12	86103269	86103948	Ift43 (+21046)
chr5	33726729	33727490	Fgfr3 (+5319)
chr15	25948412	25948538	Zfp622 (-35891)
chr1	193227591	193227740	Hsd11b1 (+14963)
chr1	134196069	134196338	Mybph (+2747)
chr5	35138121	35138542	Lrpap1 (-32566)
chr16	37676091	37676671	Ndufb4 (-21928)
chr18	4346219	4346893	Map3k8 (+6397)
chr2	119898106	119898655	Mga (+1153)
chr8	36677886	36678153	6430573F11Rik (+220446)
chr13	49246117	49246294	Susd3 (+2088)
chr17	71120448	71120932	Lpin2 (-83986)
chr15	100814679	100814819	Slc4a8 (+53002)
chr16	90924767	90924958	1110004E09Rik (+9964)
chr13	95186092	95186224	Pde8b (+36908)
chr4	107215981	107216223	Ldlrad1 (+6922)
chr5	57743069	57743203	Pcdh7 (+25169)
chr2	132279933	132280306	Cds2 (+16972)
chr6	108260721	108260933	Itpr1 (+47731)
chr2	69096709	69097247	Nostrin (-38822)
chr14	91087671	91088228	NONE
chr12	102058235	102058790	Slc24a4 (-70661)
chr2	103144326	103145080	Apip (+71028)
chr2	4608032	4608304	Prpf18 (+43918)
chr8	20912144	20912335	Gm6040 (+9831)
chr11	106417635	106417867	Icam2 (-34970)
chr19	41190297	41190439	Tll2 (+16406)
chr11	35679806	35680226	Pank3 (-89468)
chr16	34516712	34517495	Kalrn (-3056)
chr12	8443847	8444458	Rhob (+55856)
chr19	5022431	5022541	Slc29a2 (-1520)
chr1	82864415	82864823	Agfg1 (+25136)
chr2	29727419	29727916	Gm13420 (+24017)
chr6	124931811	124932508	Mlf2 (+728)
chr11	120796211	120796799	Dus1l (-110)
chr3	103627788	103627915	Atg4a-ps (+18216)
chr7	118110156	118110589	Rps15a (+5815)
chr11	78317786	78318666	Aldoc (-4742)
chr13	101711129	101711214	Pik3r1 (+57045)
chr16	92366906	92367281	Kcne1 (-7626)
chr15	7201752	7202019	Lifr (+47533)
chr14	100286428	100286731	Klf12 (-136816)
chr9	21438184	21438573	Dnm2 (+13283)
chr16	43489197	43489851	Tigit (+174660)
chr4	148527182	148527875	Angptl7 (-27069)
chr16	50678651	50678826	Ccdc54 (-87585)
chr19	18354110	18354221	Ostf1 (+277623)
chr3	57944744	57945294	Pfn2 (-96940)
chr4	104275175	104275572	Dab1 (-92216)
chr11	35374938	35375558	Slit3 (+254024)
chr2	102624330	102625006	Slc1a2 (-33991)
chr8	125084295	125085000	Disc1 (+30453)
chr13	49460792	49461620	Ippk (+39957)
chr18	8044869	8045019	Wac (+175747)
chr4	129990021	129990350	Adgrb2 (-1882)
chr11	19203838	19204450	Meis1 (-185175)
chr15	80418083	80418538	Cacna1i (+131073)
chr8	18745790	18746328	Angpt2 (-4497)
chr15	99759472	99759988	Cers5 (+12871)
chr12	8454317	8455034	Rhob (+45333)
chr13	55494695	55494977	Dbn1 (-6725)
chr15	25442369	25442506	Basp1 (-28674)
chr11	120088237	120088417	Cep131 (-1500)
chr18	24074532	24074949	Ino80c (+47212)
chr12	10332804	10333060	Nt5c1b (-37041)
chr4	8939063	8939475	Chd7 (+247904)
chr12	5213563	5214031	Klhl29 (+161885)
chr6	88147242	88147926	Gata2 (-50750)
chr8	91552036	91552749	Fto (+238868)
chr2	128709166	128709898	Mertk (+10576)
chr4	42954468	42955231	Dnajb5 (+4454)
chr11	108224408	108224901	Prkca (+119273)
chr8	69263195	69263799	D130040H23Rik (-37279)
chr18	76930146	76930637	Ier3ip1 (+375)
chr12	113027978	113028596	Pacs2 (+13779)
chr12	42948003	42948134	NONE
chrX	141211723	141211980	Atg4a (+254945)
chr1	143053128	143053629	B3galt2 (-587285)
chr12	109354697	109355871	Dlk1 (-97565)
chr2	27229382	27230241	Sardh (+17454)
chr2	6086676	6087162	Proser2 (+43292)
chr8	10812284	10812661	Irs2 (+195985)
chr2	17710404	17710541	Nebl (+20570)
chr7	112681021	112681134	Tead1 (+1758)
chrX	159584637	159585076	Sh3kbp1 (-42415)
chr5	124899902	124900357	Zfp664 (+37439)
chr11	117162939	117163382	Sept9 (-36500)
chr11	57776378	57776531	Sap30l (-25182)
chr15	86768244	86768339	Tbc1d22a (+553833)
chr11	104211344	104211720	Mapt (-20052)
chr18	38264778	38265056	0610009O20Rik (+14668)
chr19	10402694	10403199	Syt7 (+13857)
chr9	109997333	109998019	Map4 (+66216)
chr2	27758177	27758939	Rxra (+81357)
chr14	27830114	27830750	Erc2 (+207990)
chr6	30982579	30982713	Klf14 (-23568)
chr14	88914122	88914350	Pcdh20 (-442840)
chr10	80679551	80680104	Mknk2 (-3535)
chr2	6927623	6928410	Celf2 (-43021)
chr13	51856976	51857530	Gadd45g (+10575)
chr10	67131469	67131957	Jmjd1c (+4455)
chr14	88346956	88347777	Pcdh20 (+124029)
chr1	167163467	167163597	Uck2 (+121788)
chr12	82207099	82207265	Sipa1l1 (+37762)
chr8	127928121	127928317	Nrp1 (-431065)
chr6	33724710	33724851	Lrguk (-304667)
chr15	31340952	31341441	Ankrd33b (+26529)
chr3	96552056	96552163	Txnip (-5847)
chr7	129987634	129987911	Fgfr2 (+278418)
chr14	121198924	121199608	Farp1 (+163702)
chr19	28298594	28299135	Rfx3 (-315917)
chr14	70530200	70530824	Lgi3 (-309)
chr1	184066622	184067448	Dusp10 (+32654)
chr13	34227897	34228607	Psmg4 (+65288)
chr12	85621203	85621380	Jdp2 (+22265)
chr2	70593572	70593960	Gad1 (+31724)
chr5	114059452	114059546	Svop (+32071)
chr19	10469594	10469724	Lrrc10b (-12212)
chr16	97778415	97778736	Ripk4 (-14839)
chr8	85492811	85493833	Gpt2 (+746)
chr14	60533860	60534072	Spata13 (-100763)
chr3	107261933	107262052	Lamtor5 (-16865)
chr12	52396272	52396479	Arhgap5 (-107640)
chr3	57479214	57479981	Tm4sf4 (+54284)
chr10	105402679	105403137	Tmtc2 (+171527)
chr9	108796438	108797226	Ip6k2 (+838)
chr4	148214458	148215443	Fbxo2 (+54330)
chr3	103801733	103801931	Dclre1b (+7612)
chr8	33603158	33603286	Ppp2cb (+3597)
chr1	83038728	83038982	Slc19a3 (-407)
chr3	137275481	137275960	Emcn (-65346)
chr11	7981129	7981494	Tns3 (+683223)
chr17	25135547	25135965	Clcn7 (+2365)
chr4	77647405	77647913	NONE
chr13	56434494	56434734	Slc25a48 (-3741)
chr11	32044176	32044549	Nsg2 (+43900)
chr11	22628876	22629618	Tmem17 (+117159)
chr2	7272803	7273460	Celf2 (-388136)
chr4	143155917	143156138	Prdm2 (+56677)
chr2	11534839	11535414	Pfkfb3 (-33026)
chr8	125996310	125997069	Kcnk1 (+1520)
chr17	31940541	31941050	Sik1 (-85004)
chr4	115862103	115862227	Kncn (-22235)
chr3	138801909	138802222	Tspan5 (+59871)
chr2	24761994	24762478	Cacna1b (+811)
chr7	73238214	73238683	Rgma (-137071)
chr7	110715449	110716155	Ampd3 (-56802)
chr7	96757494	96758371	Nars2 (-193572)
chr14	113984873	113985025	Tpm3-rs7 (+670341)
chr5	146739667	146739771	Usp12 (+55287)
chr8	80915502	80915618	Gab1 (-35041)
chr3	141893353	141893557	Bmpr1b (+88809)
chr18	36028314	36028763	Psd2 (+63709)
chr10	11049312	11049718	Grm1 (+32841)
chr11	86596093	86596691	Tubd1 (+51401)
chr15	80649800	80650175	Fam83f (-21859)
chr9	121275095	121275302	Ulk4 (+1998)
chr13	55394542	55394803	Slc34a1 (-3514)
chr3	26751531	26751725	Spata16 (+114008)
chr10	27322714	27322952	Lama2 (+294010)
chr14	32323104	32323615	Ogdhl (+1341)
chr11	70746702	70747030	Zfp3 (-17343)
chr5	77534328	77535065	Igfbp7 (-126657)
chr8	120186275	120186977	Fam92b (-9160)
chr7	49287838	49288607	Nav2 (+41379)
chr1	90204802	90205551	Ackr3 (+1197)
chr8	121565745	121565910	Fbxo31 (+12978)
chr12	100820249	100820500	9030617O03Rik (+41318)
chr12	44330360	44330893	Nrcam (+1644)
chr19	53501951	53502047	Dusp5 (-27110)
chr12	79692013	79692444	Rad51b (+394878)
chr1	38199630	38200270	Rev1 (-70288)
chr15	73733016	73733698	Ptp4a3 (+8427)
chr12	26120136	26120297	Rnf144a (+295037)
chr3	88761372	88761519	Syt11 (+13718)
chr11	3719846	3720643	Morc2a (+70751)
chr5	123906833	123907428	Denr (-44)
chr2	69543880	69544368	Lrp2 (+41941)
chr10	75112442	75113023	Bcr (+52141)
chr3	107869290	107869489	Eps8l3 (-7839)
chr4	81447280	81447773	Mpdz (-4720)
chr7	74990092	74990791	Sv2b (+318820)
chr10	108801295	108801831	Gm5136 (-101403)
chr14	27076047	27076221	Il17rd (+37193)
chr7	144953345	144953459	Ccnd1 (-13533)
chr12	102594534	102594791	Chga (+39694)
chr11	96824887	96825443	Nfe2l1 (+4803)
chr8	64843082	64843722	Klhl2 (+6615)
chr9	68940856	68941526	Rora (+287405)
chr12	102638694	102638871	Itpk1 (+66147)
chr10	108994279	108994451	Syt1 (+16610)
chrX	50635047	50635235	Stk26 (-205906)
chr1	118643251	118643467	Tfcp2l1 (+15413)
chr2	38182280	38182787	Dennd1a (+104841)
chr13	105464315	105464455	Htr1a (+20746)
chr3	120532029	120532259	Rwdd3 (+639550)
chr5	96226698	96226970	Mrpl1 (+17341)
chr10	80312548	80312996	2310011J03Rik (+7765)
chr4	83060800	83061410	Frem1 (-40003)
chr11	96931474	96932266	Prr15l (+2546)
chr11	3785613	3786095	Osbp2 (+78049)
chr2	145649081	145649202	Rin2 (-136974)
chr1	182851913	182852078	Susd4 (+87101)
chr18	65539976	65540242	Zfp532 (-40121)
chr5	31069809	31070039	Cad (+15144)
chr9	102779348	102779906	Ryk (-55290)
chr9	108157343	108158078	Bsn (+32673)
chr9	111301994	111302703	Trank1 (-9390)
chr17	43704384	43704997	Cyp39a1 (+37266)
chr13	41662723	41662924	Tmem170b (+56608)
chr7	81542411	81542699	Fsd2 (+24389)
chr6	55203668	55204030	Mindy4 (+466)
chr8	61359560	61360384	Cbr4 (-127762)
chr9	120896616	120896822	Ctnnb1 (-36681)
chr13	16645995	16646865	Inhba (+634579)
chr12	29106955	29107993	Tssc1 (+355671)
chr3	145075794	145075972	Clca2 (+23221)
chr19	53040181	53040455	Xpnpep1 (-104)
chr3	68572247	68572648	Il12a (-118976)
chr11	99333240	99333847	Krt26 (+4422)
chr18	65584700	65585301	Zfp532 (+4771)
chr9	57969941	57970701	Sema7a (+30208)
chr12	14747028	14747160	Fam84a (-595040)
chr2	118389229	118389353	Eif2ak4 (+673)
chr13	64745468	64745709	Cntnap3 (+158366)
chr11	35406878	35407209	Slit3 (+285820)
chr17	65680063	65680643	Txndc2 (-38149)
chr13	13954406	13955447	B3galnt2 (+458)
chr17	88630054	88630158	Ston1 (+3551)
chr11	65438502	65438681	Myocd (-168603)
chr7	99267127	99267296	Map6 (-235)
chr2	24502666	24503165	Pax8 (-27317)
chr3	65455643	65456257	Ssr3 (-63327)
chr13	8823051	8823601	Wdr37 (+48404)
chr4	129112980	129113750	Tmem54 (+7817)
chr18	82927671	82927912	Zfp516 (+16913)
chr2	147736373	147736487	Foxa2 (+309518)
chr12	101948069	101948193	Atxn3 (+10115)
chr2	110176445	110176692	Bbox1 (+129172)
chr14	33883168	33883433	Gdf10 (-40286)
chr12	21146104	21146442	Asap2 (+34525)
chr11	107771997	107772491	Cacng4 (+22313)
chr10	80962059	80962721	Gadd45b (+32317)
chr5	150128290	150128874	Rxfp2 (+109907)
chr3	52600476	52601777	Foxo1 (+332791)
chr10	51271238	51271788	Lilr4b (-209119)
chr2	130200782	130201275	Tmc2 (+5835)
chr1	169532325	169532441	Nuf2 (-919)
chr13	52807126	52807414	Auh (+122391)
chr14	99631101	99631565	Klf5 (+332642)
chr4	149791317	149792086	Slc25a33 (-17425)
chr11	77174154	77175083	Efcab5 (+14349)
chr4	129743532	129743884	Khdrbs1 (-1412)
chr19	38460616	38461260	Plce1 (-63259)
chr4	119798983	119799094	Hivep3 (-15456)
chr2	30381539	30381713	Dolpp1 (-10628)
chr10	97940277	97940791	C030005K15Rik (-213779)
chr15	78195595	78195748	Pvalb (+8565)
chr6	134513957	134514136	Lrp6 (+52866)
chr4	135703580	135704009	Ifnlr1 (+17508)
chr3	116016063	116016802	Extl2 (+8971)
chr5	124148574	124149221	Arl6ip4 (+32799)
chr15	84697575	84698164	Prr5 (+16868)
chr3	95882412	95883229	Ciart (-616)
chr1	174500769	174500886	Fmn2 (-997)
chr2	46330851	46330970	NONE
chr2	29292181	29292550	Ntng2 (-44326)
chr7	80660221	80661116	Crtc3 (+28208)
chr14	12059077	12059686	3830406C13Rik (-224791)
chr1	75284954	75285339	Resp18 (-6732)
chr2	130657469	130658079	Ddrgk1 (+6885)
chr11	119829596	119830280	Chmp6 (-83872)
chr6	88308036	88308185	Dnajb8 (+85843)
chr5	119776268	119776416	Tbx5 (-58321)
chr10	40307301	40307458	Amd1 (-5194)
chr2	25430819	25431436	Abca2 (+2425)
chr15	12045395	12045643	Sub1 (-49461)
chr1	134530504	134531045	Mgat4e (+18907)
chr11	78322288	78322907	Aldoc (-370)
chr7	131346280	131346447	Fam24a (+12500)
chr1	47449147	47449347	Slc39a10 (-595201)
chr17	73962447	73963115	Xdh (-12599)
chr3	89912471	89913032	Il6ra (+410)
chr18	54990022	54991052	Zfp608 (-357)
chr10	13988093	13988646	Hivep2 (+21991)
chr7	65654118	65654256	Tarsl2 (+9289)
chr12	111853386	111853903	Zfyve21 (+39475)
chr18	13268473	13268956	Hrh4 (+261725)
chr11	20858629	20859667	Lgalsl (-28092)
chr4	133386514	133386643	Slc9a1 (+16873)
chr11	97836821	97837457	B230217C12Rik (-3641)
chr15	102750194	102750459	Calcoco1 (-28149)
chr2	35623978	35624484	Dab2ip (+2194)
chr11	41260351	41260558	Ccng1 (-505144)
chr1	194700497	194700626	Plxna2 (+80737)
chr18	44304431	44304589	Myot (-29564)
chr13	47193001	47193177	Rnf144b (+70433)
chr11	31555077	31555190	Bod1 (+116751)
chr9	27136753	27136987	Jam3 (+18523)
chr2	59431859	59432129	Dapl1 (-52659)
chr3	52653066	52653326	Cog6 (+364041)
chr2	91283819	91284433	Arfgap2 (+18833)
chr19	5849832	5850739	Frmd8 (+24988)
chr9	7950345	7950478	Yap1 (+54184)
chr12	109445902	109446156	Dlk1 (-6820)
chr7	141417904	141418338	Gatd1 (-3985)
chr19	45915806	45916590	9130011E15Rik (+82290)
chr2	173025458	173025605	Rbm38 (+5034)
chr7	125159730	125159876	Kdm8 (-284873)
chr16	5976061	5976242	Eef2kmt (-720169)
chr4	91340946	91341173	Elavl2 (+35403)
chr16	37684070	37684486	Ndufb4 (-29825)
chr12	55385688	55386523	Psma6 (-12669)
chr2	167876725	167877401	Ptpn1 (-55264)
chr11	8010704	8010939	Tns3 (+653713)
chr16	18340007	18340186	Tango2 (+3830)
chr8	120043953	120044075	Crispld2 (+51506)
chr2	26112514	26112739	Nacc2 (-20450)
chr19	60759604	60759829	Nanos1 (+3730)
chr18	55624088	55624439	Zfp608 (-634084)
chr16	72794920	72795408	Robo1 (+132015)
chr11	57419467	57419795	Fam114a2 (+98972)
chr1	66378567	66379305	Map2 (+57217)
chr11	77497701	77498491	Git1 (+4534)
chr2	148588758	148589117	Nxt1 (-83663)
chr10	5358633	5358927	Syne1 (+191912)
chr5	125258011	125259086	Ncor2 (-79496)
chr4	154463905	154464886	Arhgef16 (-164342)
chr18	77737198	77737594	Haus1 (+30384)
chr3	86923183	86923514	Dclk2 (-2497)
chr16	29816790	29817682	Opa1 (+237856)
chr16	95841478	95842016	Ets2 (+139672)
chr11	97469758	97470220	Arhgap23 (+19829)
chr7	81139067	81139535	Slc28a1 (+24451)
chr7	130908473	130908796	Htra1 (-27568)
chr4	43039341	43039846	Fam214b (+694)
chr8	46210929	46211657	Slc25a4 (-9)
chr4	111326996	111327715	Bend5 (-87650)
chr19	17636078	17636336	Pcsk5 (+201425)
chr18	57132978	57133175	Megf10 (-13)
chr3	153571064	153571577	St6galnac3 (+153853)
chr10	58370247	58370884	Lims1 (-23807)
chr11	40755051	40755838	Ccng1 (-134)
chr6	92390363	92390507	Trh (-145785)
chr16	26838905	26839095	Gmnc (+150974)
chr9	119457284	119457535	Exog (+12506)
chr14	24205533	24205974	Dlg5 (+40166)
chr1	74047225	74047797	Tns1 (+76936)
chr14	64820573	64821334	Hmbox1 (+128917)
chr15	77192085	77192717	Rbfox2 (+114652)
chr19	43856541	43856761	Abcc2 (+74459)
chr2	70318927	70319093	Sp5 (-155913)
chr11	35463326	35463713	Pank3 (-305964)
chr1	159510621	159511133	Tnr (-12892)
chr10	59979051	59979632	Anapc16 (+23769)
chr6	94946315	94946416	Kbtbd8 (-171374)
chr5	30578071	30578205	Kcnk3 (-10032)
chr6	139730961	139731192	Pik3c2g (+15216)
chr5	149579152	149579415	Wdr95 (+50605)
chr12	52857722	52858101	Akap6 (+158529)
chr8	83695239	83695826	Pkn1 (-1473)
chr11	50590981	50591585	Adamts2 (-10801)
chr10	61464773	61465687	Lrrc20 (-10571)
chr2	102112874	102113023	Ldlrad3 (+73436)
chr2	79143242	79143486	Itga4 (-112136)
chr3	94473122	94473406	Riiad1 (+327)
chr7	58709418	58709653	Atp10a (+51290)
chr11	95039423	95040092	Pdk2 (+1596)
chr12	86163482	86164080	Gpatch2l (-78077)
chr14	66873131	66873830	Gm5464 (+4631)
chr6	72512466	72513346	Sh2d6 (+7721)
chr9	118960263	118960947	Ctdspl (+34152)
chr16	34347648	34347789	Kalrn (+166329)
chr2	143978470	143978601	Rrbp1 (+32727)
chr19	52469206	52469436	Ins1 (+204998)
chr4	44125839	44126308	Rnf38 (+41534)
chrX	74304320	74304882	Gdi1 (-397)
chr4	126792657	126793204	AU040320 (+39161)
chr2	92687492	92688319	Chst1 (+88199)
chr19	23057717	23058244	Klf9 (-83245)
chr14	75845589	75846249	Tpt1 (+826)
chr6	121560387	121560602	A2m (-75733)
chr6	54888545	54888680	Znrf2 (+71697)
chr19	54836479	54836705	Gpam (+262859)
chr3	100402442	100403013	Fam46c (+86596)
chr8	128269107	128269359	Nrp1 (-90051)
chr3	30546864	30547215	Actrt3 (+52899)
chr8	61276307	61276785	Sh3rf1 (+52674)
chr3	82027203	82027732	Asic5 (+30546)
chr10	24493690	24494325	Ctgf (-101434)
chr1	152603450	152604047	Rgl1 (+21468)
chr5	132229492	132230136	Auts2 (-752790)
chr16	38947366	38948215	Igsf11 (+45475)
chr19	29023992	29024830	Ak3 (+23550)
chr1	182669670	182670316	Ccdc185 (+79187)
chr9	118565585	118565962	Itga9 (-40916)
chr3	86935533	86935785	Dclk2 (-14807)
chr7	57531413	57531566	Gabra5 (-21481)
chr14	50829567	50829783	Parp2 (+21729)
chr7	142001842	142002283	Brsk2 (+51977)
chr15	76264025	76264840	Spatc1 (-3656)
chr15	91316605	91317541	CN725425 (+117579)
chr1	69429625	69429798	Ikzf2 (+256109)
chr2	165073374	165073550	1700025C18Rik (+17288)
chr5	55449094	55449321	NONE
chr19	8663874	8664069	Chrm1 (-33)
chr2	38088486	38088761	Dennd1a (+198751)
chr8	56804795	56804973	Fbxo8 (+253794)
chrX	84842148	84842349	Fthl17a (-407430)
chr2	93903089	93903267	Accsl (-34021)
chr5	141988619	141989224	Foxk1 (-412578)
chr19	44400249	44400891	Scd1 (+7139)
chr16	5497715	5497836	Eef2kmt (-241793)
chr16	95241619	95241850	Kcnj15 (-15823)
chr8	120456346	120456499	Gse1 (-32024)
chr5	87499048	87499200	Ugt2a1 (-8253)
chr6	14142179	14142712	2610001J05Rik (-270928)
chr1	132335565	132335777	Nuak2 (+19545)
chr15	62641370	62641561	Myc (+656075)
chr2	178308702	178308915	Sycp2 (+98876)
chr12	104609560	104610029	Gsc (-136465)
chr7	28783674	28784347	Rinl (-4958)
chr15	62295124	62295799	Myc (+310071)
chr8	3221077	3221847	Insr (+58155)
chr8	44707742	44707851	Fat1 (-227650)
chr3	53713805	53713988	Frem2 (-56542)
chr13	5306743	5306971	Klf6 (-554625)
chr17	34564047	34564624	Notch4 (+68)
chr7	81681327	81681699	Homer2 (+25296)
chr7	135028986	135029602	Fam196a (-90864)
chr12	8344755	8345539	Hs1bp3 (+31715)
chr9	65113973	65114491	Igdcc4 (+12746)
chr8	120285366	120285913	Fam92b (-108174)
chr1	172358183	172359028	Kcnj10 (+17396)
chrX	158591082	158591540	Cnksr2 (-548017)
chr14	12177482	12178116	3830406C13Rik (-106374)
chr2	6270256	6270900	Echdc3 (-57545)
chr1	89801294	89802022	Gbx2 (+129521)
chr10	60262268	60262787	Psap (-15100)
chr17	88581304	88581944	Ston1 (-44931)
chr3	18941092	18941774	Armc1 (+221632)
chr6	8778342	8778453	Ica1 (+86)
chr1	135036930	135037080	Lgr6 (+68271)
chr8	78022819	78022917	Ttc29 (-190474)
chr7	90120139	90120341	Picalm (-9975)
chr16	43363668	43364207	Tigit (+300246)
chr6	39573573	39574142	Adck2 (-15)
chr15	53063476	53064112	Ext1 (+282365)
chr7	4938715	4939117	Ssc5d (+13131)
chr7	109526211	109526444	Rpl27a (+7181)
chr11	106709347	106709652	Pecam1 (+5894)
chr15	97762913	97763181	Rapgef3 (+4799)
chrX	35978206	35978456	Dock11 (+89499)
chr11	84870721	84871161	Ggnbp2 (-152)
chr8	110919089	110919752	St3gal2 (-501)
chr11	108221390	108222056	Prkca (+122205)
chr14	102020183	102020980	Lmo7 (+290625)
chr1	92309752	92310406	Hdac4 (-129738)
chr9	68268131	68269044	Rora (-385198)
chr9	48739800	48740716	Zbtb16 (+95687)
chr2	136711062	136712351	Snap25 (-1746)
chr1	65376339	65376446	Pth2r (+65136)
chr8	120328490	120328607	Fam92b (-151083)
chr5	112045655	112045789	Cryba4 (+206796)
chr10	53176296	53176451	Pln (-161319)
chr10	122602506	122602719	Ppm1h (-76169)
chr5	71885888	71886048	Gabrb1 (+186036)
chr16	28704432	28704639	Mb21d2 (+225162)
chr11	77632348	77632858	Taok1 (-24788)
chr2	125587806	125588547	Cep152 (+36936)
chr2	110488037	110488746	Slc5a12 (-108906)
chr7	116444514	116444933	Pik3c2a (-1275)
chr8	8533088	8533207	Efnb2 (+128094)
chr2	127612055	127612776	Mrps5 (+25194)
chr18	73388354	73388504	Mex3c (-184615)
chr16	13516037	13516210	Parn (+152046)
chr13	98107751	98107892	Arhgef28 (+98345)
chr2	135851786	135852026	Plcb4 (+110076)
chr17	26698411	26698540	Crebrf (-17174)
chr6	83775975	83776344	Tex261 (-347)
chr6	17921902	17922393	Wnt2 (+108437)
chr1	43178622	43179256	Fhl2 (-14978)
chr12	9689362	9689904	Osr1 (+115192)
chr15	78371880	78372474	Tex33 (+23735)
chr4	150543420	150544546	Slc45a1 (+108191)
chr10	75950278	75950406	Vpreb3 (+2042)
chr4	11962422	11962544	Pdp1 (+3498)
chr19	33224191	33224337	Rnls (+168001)
chr3	103713030	103713690	Olfml3 (+24641)
chr3	105758510	105759357	Rap1a (+42402)
chr9	48786560	48787767	Zbtb16 (+48781)
chr2	28521273	28522192	Ralgds (-11809)
chr19	23141887	23142013	Klf9 (+724)
chr17	90672776	90672911	Gm10308 (-415649)
chr19	16284162	16284329	Gnaq (+151415)
chr2	27205919	27206369	Dbh (+40911)
chr3	65527757	65528410	Tiparp (-326)
chr7	6708401	6708707	Zim1 (-12104)
chr19	28990630	28991472	Cdc37l1 (+551)
chr10	41889213	41890153	Sesn1 (+79748)
chr4	72605145	72605387	Aldoart1 (+247368)
chr11	77291591	77291711	Ssh2 (-56631)
chr9	118625281	118625469	Itga9 (+18685)
chr14	27342326	27342630	Fam208a (-86356)
chr4	141952091	141952495	Fhad1 (+62774)
chr8	60615519	60615775	Mfap3l (-17213)
chr7	141303052	141303544	Drd4 (+11292)
chr6	108453935	108454665	Bhlhe40 (-206329)
chr5	89170869	89171745	Slc4a4 (+284008)
chr8	70462233	70463014	Klhl26 (+14281)
chr11	70710064	70710775	Kif1c (+9872)
chr13	63990793	63991381	Hsd17b3 (+98114)
chr15	78530718	78530871	C1qtnf6 (-1170)
chr9	14846776	14846909	Gpr83 (-13367)
chr5	49651018	49651236	Kcnip4 (-126220)
chr1	160142178	160142717	Tnn (+11132)
chr16	34236857	34237501	Umps (-270141)
chr4	49522296	49523254	Zfp189 (+1558)
chr10	59920803	59921818	Ddit4 (+30523)
chr2	91971507	91971887	Dgkz (-21270)
chr19	28368279	28368357	Glis3 (+311759)
chr1	105810547	105811134	Tnfrsf11a (+30123)
chr7	107752080	107752632	Cyb5r2 (+5676)
chr9	13766401	13767050	Mtmr2 (+18316)
chr5	38090354	38090950	Stx18 (+51910)
chr1	154117612	154118700	Zfp648 (-83031)
chr2	102061875	102062614	Ldlrad3 (+124140)
chr2	92988189	92988893	Prdm11 (+57030)
chr11	97418713	97419728	Arhgap23 (-30939)
chr11	89124576	89124865	Gm525 (+50880)
chr8	26811877	26812064	Zfp703 (-165383)
chr5	114579682	114580068	Fam222a (+11859)
chr11	115608627	115608870	Mif4gd (+3754)
chr13	59079803	59080488	Ntrk2 (+272449)
chr2	123387056	123387766	Sqor (+605412)
chr16	12146382	12147107	Shisa9 (+162164)
chr17	12143945	12144437	Agpat4 (+24907)
chr13	110798762	110799457	Plk2 (+404064)
chr14	23573611	23573725	Kcnma1 (+430537)
chr9	110688022	110688184	Ccdc12 (+31600)
chr6	13637766	13637948	Tmem168 (-29757)
chr15	79731125	79731244	Sun2 (+11351)
chr13	10340632	10340761	Chrm3 (+20147)
chr15	38454295	38454444	Azin1 (+64896)
chr16	42520387	42520726	Gap43 (-179906)
chr15	27476067	27476251	Ank (+9482)
chr4	132977443	132977605	Fgr (+3422)
chr19	26615922	26616391	Smarca2 (+11105)
chr9	31414217	31414612	Nfrkb (+28223)
chr11	121173121	121173747	Uts2r (+13163)
chr1	118980433	118981091	Gli2 (+72857)
chr10	39640783	39641504	Traf3ip2 (+28210)
chr19	26865705	26866234	Gm815 (-19955)
chr10	3881035	3881617	Mthfd1l (-91805)
chr8	107993887	107994748	Zfhx3 (+51674)
chr18	77570236	77570852	Rnf165 (-5408)
chr13	42783170	42783832	Phactr1 (+73920)
chr18	15234854	15235533	Aqp4 (+168490)
chr18	35262636	35262796	Lrrtm2 (-47692)
chr2	165613859	165614059	Eya2 (-41339)
chr8	18777921	18778130	Angpt2 (-36464)
chr3	135486227	135486496	Manba (+751)
chr18	61874697	61875208	Ablim3 (+36871)
chr6	127886797	127887438	Tspan11 (-471)
chr15	31530983	31531492	March6 (-201)
chr5	135879563	135880151	Hspb1 (-8062)
chr15	92348395	92348989	Pdzrn4 (-48223)
chr12	111592481	111592647	Mark3 (+18037)
chr5	32360604	32360814	Ppp1cb (-98134)
chr12	70589589	70589808	Tmx1 (+136604)
chr15	60010361	60010571	4933412E24Rik (+6152)
chr3	51544515	51544709	Setd7 (+16267)
chr9	122729401	122729653	Topaz1 (-17819)
chr5	140566144	140566624	Grifin (-1313)
chr3	157311752	157311921	Zranb2 (-222323)
chr16	38729874	38730377	B4galt4 (-12138)
chr1	39944808	39945700	Map4k4 (+44075)
chr8	34165125	34165727	Saraf (+10850)
chr7	97446071	97447290	Kctd14 (-4642)
chr8	36511459	36512020	6430573F11Rik (+54166)
chr16	22483638	22484034	Etv5 (-44117)
chr16	36772882	36773573	Slc15a2 (+11734)
chr7	78814851	78815021	Mrps11 (+31817)
chr10	127596196	127596439	Lrp1 (+24830)
chr9	110132181	110132441	Smarcc1 (+331)
chr19	48205292	48205614	Sorcs3 (-572)
chr14	101553346	101553574	Tbc1d4 (+55573)
chr2	92316553	92316985	Large2 (+54217)
chr2	102636122	102636581	Slc1a2 (-22307)
chr1	154676824	154677319	Cacna1e (+49284)
chr17	5106683	5107282	Arid1b (+111909)
chr19	6451689	6452492	Nrxn2 (+33360)
chr9	15541460	15541979	Smco4 (+48288)
chr14	27219505	27220291	Arhgef3 (-18141)
chr2	35963666	35963792	Ttll11 (+15895)
chr15	39770843	39771249	Dcstamp (+25114)
chr6	53922439	53922751	Cpvl (+56067)
chr13	51868746	51868969	Gadd45g (+22180)
chr11	19923999	19924387	Spred2 (-249)
chr19	5108013	5108626	Rab1b (-1324)
chr2	144246115	144246691	Mgme1 (-24497)
chr11	116703049	116703192	St6galnac2 (-8253)
chr15	79348011	79348356	Maff (+643)
chr12	101804073	101804290	Fbln5 (+14873)
chr7	141259126	141259756	Irf7 (+7040)
chr8	66209810	66210048	March1 (+88187)
chr18	45961149	45961648	Trim36 (+251208)
chr2	181134101	181134887	Kcnq2 (+720)
chr17	28424546	28424687	Tulp1 (-59469)
chr2	135954847	135955039	Lamp5 (-102984)
chr5	4819099	4819288	Fzd1 (-61159)
chr6	126697776	126698277	Kcna6 (+42647)
chr3	95235345	95235674	Gm128 (+6088)
chr2	164423379	164424030	Matn4 (-19091)
chr11	88839619	88840299	Akap1 (+24627)
chrX	140527315	140527429	Prps1 (+70759)
chr14	54484669	54484812	Rem2 (+8641)
chr10	40639057	40639406	Ddo (+9221)
chr1	91356080	91356541	Klhl30 (+5295)
chr5	121835968	121836642	Sh2b3 (+554)
chr7	143329342	143329887	Cdkn1c (+131381)
chr11	60802209	60802555	Shmt1 (+8883)
chr2	139198498	139198657	Sptlc3 (-295342)
chr13	34064170	34064288	Tubb2a (+13778)
chr2	152282298	152282821	Tbc1d20 (-11268)
chr9	42852139	42852613	Grik4 (+92117)
chr1	160179908	160180254	Mrps14 (-15134)
chr15	31392704	31393136	Ankrd33b (-25194)
chr14	76951323	76951984	Lacc1 (+84987)
chr3	49009106	49009793	Pcdh18 (+747866)
chr10	79803725	79804744	Palm (+10663)
chr14	71001599	71002142	Gfra2 (+111741)
chr1	36633815	36634323	Fam178b (+49114)
chr14	123296101	123296218	Tmtc4 (-312877)
chr3	153841261	153841602	Asb17 (-2777)
chr3	100854264	100854505	Vtcn1 (+28926)
chr13	48864959	48865400	Phf2 (+5939)
chr4	97761252	97761742	Nfia (-16111)
chr17	29873442	29874070	Mdga1 (+14126)
chr16	43732284	43732789	Drd3 (-29684)
chr17	72970517	72971185	Lbh (+52546)
chr10	84229475	84230266	Nuak1 (+210726)
chr5	149334817	149335524	Alox5ap (+70404)
chr16	90694842	90695556	Mis18a (+32205)
chr5	39633406	39633544	Hs3st1 (+122000)
chr13	38483294	38483575	Txndc5 (+45055)
chr5	134891578	134891738	Wbscr28 (+15075)
chr3	53745001	53745109	Frem2 (-87700)
chr11	75932402	75932556	Rph3al (+5259)
chr10	128343892	128344043	Cs (+6234)
chr12	21184307	21184485	Asap2 (+72648)
chr4	115881351	115881482	Kncn (-2983)
chr6	53017168	53017299	Jazf1 (+51397)
chr8	84691261	84691537	Trmt1 (+2533)
chr17	69770032	69770533	Akain1 (+330957)
chr16	76687773	76688261	Nrip1 (-314190)
chr11	105944578	105945143	Cyb561 (-449)
chr2	27598860	27599577	Rxra (-77982)
chr9	109087887	109088695	Tma7 (-5704)
chr11	3484089	3484990	Pla2g3 (-3744)
chr12	104576702	104577385	Gsc (-103714)
chr7	113791866	113792730	Spon1 (+26300)
chr7	91863121	91863525	Ccdc90b (-697826)
chrX	152946314	152946478	Usp51 (-60073)
chr16	6552487	6552883	Rbfox1 (-517150)
chr14	70331470	70331817	Slc39a14 (+19781)
chr19	46644997	46645523	Cyp17a1 (+27714)
chr3	50379879	50380480	Slc7a11 (+63431)
chr5	124187765	124188588	Pitpnm2 (-995)
chr18	80316383	80317575	Kcng2 (+47275)
chr7	27257138	27257246	Numbl (-1533)
chr17	25362033	25362140	Tpsb2 (-4463)
chr18	39088838	39089020	Arhgap26 (+95784)
chr6	19211399	19211530	Ankrd7 (+345115)
[truncated: 3,596 more rows]

## Sheet: NR3C1_ChIP_Intergenic
Rat Glucocorticoid Receptor ChIP-Seq from: Polman et al.; doi:10.1210/en.2012-2187 & Pooley et al.; doi:10.1210/en.2016-1929
converted to MM10 and filtered for the presence of the GRE motif
Intergenic Peaks
Chromosome	Start	End
1	4543977	4544359
1	4571353	4572110
1	6288443	6288691
1	7291147	7291286
1	11349687	11349879
1	12292623	12292788
1	18292432	18292684
1	18468497	18468737
1	21305673	21306415
1	22904672	22905256
1	23023553	23023777
1	23257556	23257732
1	25008454	25009024
1	31730411	31734684
1	34571205	34572129
1	34664174	34664772
1	37583607	37584224
1	39086138	39086611
1	39759883	39760043
1	40188203	40188361
1	41001454	41001884
1	42165997	42166240
1	42465457	42465610
1	43360186	43360551
1	45856026	45856180
1	47449147	47449347
1	50836045	50836532
1	50897867	50898482
1	51690699	51691342
1	53734176	53734552
1	57440880	57441006
1	57589925	57590137
1	59435534	59435639
1	59912207	59912793
1	61540014	61540221
1	64018514	64019071
1	64020872	64021648
1	64463991	64464220
1	66820568	66820850
1	67503693	67503896
1	67745913	67747581
1	69429625	69429798
1	69449391	69449493
1	71723777	71724247
1	72414688	72414888
1	73265165	73265325
1	74197482	74198270
1	74211241	74211386
1	74390184	74390532
1	75284954	75285339
1	76070735	76071257
1	77300873	77300978
1	77545148	77545292
1	77987158	77987672
1	78590298	78591121
1	83038728	83038982
1	83431945	83432205
1	83551684	83553143
1	83595394	83595613
1	84962133	84962763
1	85857497	85857600
1	85921656	85922171
1	86483792	86483910
1	87722303	87722747
1	88836774	88837324
1	89196240	89196570
1	90202322	90202552
1	90318387	90318920
1	90896813	90897008
1	91459325	91459627
1	92309752	92310406
1	93685354	93685520
1	95176318	95176546
1	96781128	96781280
1	105191179	105191284
1	106396771	106397280
1	113489057	113489195
1	118693145	118693602
1	119291938	119292201
1	119885831	119886073
1	121701900	121702042
1	125450571	125450837
1	131547335	131547838
1	132335565	132335777
1	133934298	133934894
1	133980303	133980404
1	134056303	134056562
1	134275934	134276640
1	134530504	134531045
1	136178585	136179021
1	136455923	136456198
1	137280537	137280657
1	143053128	143053629
1	151040854	151041358
1	151087684	151088392
1	151128088	151128320
1	151167935	151168392
1	151830003	151830169
1	153587820	153588231
1	153720689	153720854
1	153996989	153997867
1	154016909	154017400
1	154139304	154140290
1	154156599	154157790
1	154183240	154183822
1	154929229	154929714
1	155011064	155011198
1	155122425	155123075
1	156788873	156789083
1	159417711	159417886
1	159510621	159511133
1	159517775	159518164
1	160179908	160180254
1	161269530	161269809
1	162611479	162611780
1	164460896	164461325
1	165286426	165286745
1	165717693	165718454
1	167163467	167163597
1	167337361	167337759
1	169086004	169086850
1	169096501	169096650
1	169532325	169532441
1	171110074	171110216
1	171551318	171551784
1	174500769	174500886
1	177320202	177320334
1	177381795	177382501
1	177511754	177511904
1	179814591	179815107
1	179824309	179824559
1	179854118	179854848
1	180427565	180428098
1	180487489	180487653
1	180568347	180568528
1	181488845	181489005
1	182082066	182082298
1	182092503	182093242
1	182107900	182108710
1	182669670	182670316
1	186128826	186129500
1	186309257	186309975
1	186618780	186619026
1	189960481	189960935
1	190495463	190496262
1	190561257	190561848
1	190570223	190570337
1	190659488	190660285
1	191628918	191629492
1	193539388	193539850
1	194361435	194361583
1	194607153	194607778
1	194882059	194882244
10	3696168	3696361
10	3715337	3715447
10	7265054	7265225
10	8694264	8694357
10	8694712	8694947
10	16341542	16341807
10	16792220	16792459
10	16803833	16804502
10	17212293	17212429
10	17366969	17367461
10	17382695	17383379
10	17527251	17527610
10	19584264	19584510
10	19588700	19589375
10	19590434	19590535
10	21573831	21574036
10	21628367	21629230
10	21679007	21679540
10	21776097	21776612
10	22000042	22000372
10	24493690	24494325
10	24534843	24535204
10	24965489	24966119
10	30980473	30980699
10	36925642	36925803
10	40307301	40307458
10	40514550	40514661
10	40516012	40516441
10	42092330	42093049
10	42118898	42119007
10	44723263	44723471
10	45050856	45051621
10	51271238	51271788
10	51553242	51553856
10	53176296	53176451
10	54549104	54549273
10	56754443	56755057
10	59920803	59921818
10	59957521	59958185
10	59969516	59970671
10	59973813	59974800
10	59979051	59979632
10	59982752	59983425
10	60262268	60262787
10	61029002	61029252
10	61277803	61278182
10	61464773	61465687
10	66879191	66879544
10	66898021	66898350
10	67467677	67467916
10	67959250	67959473
10	68085672	68085905
10	69334617	69335132
10	70398721	70398983
10	71250424	71250997
10	71491383	71491538
10	75849765	75850852
10	75950278	75950406
10	76636098	76636442
10	77440945	77441064
10	78105231	78105335
10	80618214	80618506
10	80663994	80665147
10	80679551	80680104
10	80933593	80933843
10	81328151	81328375
10	84119896	84120495
10	84229475	84230266
10	87447530	87447653
10	91267802	91268401
10	92556318	92556971
10	93083249	93083351
10	93104263	93104901
10	95624132	95624408
10	96764168	96764346
10	98806781	98807259
10	99442175	99442337
10	100621445	100621612
10	102845536	102845736
10	111329241	111329698
10	115896442	115896608
10	122241860	122242057
10	122602506	122602719
10	126813071	126813610
10	127141077	127141203
10	127264020	127264275
10	127924791	127925128
10	127985721	127986271
11	3484089	3484990
11	3903187	3903583
11	4215790	4216979
11	6104513	6105319
11	6497349	6497517
11	6964401	6964878
11	7182354	7182685
11	7945192	7945388
11	7981129	7981494
11	8010704	8010939
11	8215560	8216041
11	8343216	8343332
11	10563023	10563227
11	12231605	12232098
11	13729598	13729708
11	17321443	17321981
11	17351615	17351809
11	19203838	19204450
11	19713168	19713323
11	19715694	19715796
11	20858629	20859667
11	22628876	22629618
11	22648179	22648434
11	22655313	22656124
11	29287272	29288775
11	31555077	31555190
11	31771100	31771445
11	31826737	31826896
11	32963592	32963831
11	35109146	35109514
11	41260351	41260558
11	43618162	43618917
11	43726473	43726721
11	45594411	45595050
11	45795964	45796114
11	48605363	48605565
11	50471954	50472361
11	50487671	50488292
11	50540295	50540486
11	50590981	50591585
11	51084187	51084778
11	51662116	51662219
11	51873969	51874783
11	51915765	51916694
11	52602043	52602563
11	53314778	53315026
11	53445604	53445710
11	54805030	54805564
11	55437962	55438657
11	56244881	56245606
11	57401477	57402115
11	57419467	57419795
11	57603725	57603845
11	60899265	60899469
11	61294330	61294874
11	64650054	64650734
11	65438502	65438681
11	66578027	66578162
11	66674346	66674905
11	69610899	69611263
11	70746702	70747030
11	71440555	71440852
11	72566464	72567404
11	77632348	77632858
11	77872173	77872332
11	79171821	79172535
11	79182752	79183349
11	80148385	80148638
11	83535680	83535839
11	89932284	89932555
11	90068867	90069142
11	90094880	90095126
11	94161300	94161806
11	94210097	94210699
11	94603207	94603316
11	95685907	95686593
11	97905554	97906225
11	98313614	98314423
11	98338550	98339283
11	98346884	98347787
11	98738675	98739209
11	100776135	100776611
11	101230810	101231572
11	102382073	102382200
11	103307014	103307167
11	103648448	103649131
11	104211344	104211720
11	107871688	107871782
11	109068671	109069401
11	111197583	111197783
11	112976887	112977070
11	113722411	113722896
11	114070119	114070537
11	114215067	114215213
11	114874973	114875113
11	115181988	115182091
11	115613201	115613425
11	115751921	115752014
11	116703049	116703192
11	116710460	116710584
11	117040677	117041207
11	117162939	117163382
11	117522634	117523187
11	117554308	117554555
11	119514892	119515541
11	119532380	119533019
11	119592829	119593431
11	120088237	120088417
11	120991643	120992199
11	121173121	121173747
11	121258996	121259592
12	3316140	3316287
12	8344755	8345539
12	8419022	8419169
12	8428531	8429302
12	8443847	8444458
12	8476597	8477126
12	9225155	9225365
12	9689362	9689904
12	10332804	10333060
12	10442622	10442863
12	11727301	11727710
12	13094497	13094648
12	14747028	14747160
12	15472620	15473085
12	16084292	16084589
12	16135532	16136054
12	16618329	16618787
12	16630295	16631021
12	16643526	16644038
12	21425974	21426459
12	21439368	21442729
12	25240116	25240717
12	29106955	29107993
12	29368309	29368521
12	30023646	30023743
12	30481931	30482192
12	32616171	32616388
12	32632763	32633325
12	36070609	36071356
12	39970602	39971072
12	42948003	42948134
12	43919192	43919399
12	46087333	46087827
12	49473282	49473876
12	50946833	50946976
12	51090717	51091000
12	51117788	51118540
12	51831043	51831448
12	52396272	52396479
12	52594046	52594174
12	54247225	54247323
12	55445293	55446183
12	55446618	55447186
12	55456666	55457001
12	59456369	59456633
12	59489864	59490039
12	59607885	59608073
12	64229689	64230111
12	66380809	66380954
12	68728531	68728721
12	70589589	70589808
12	70696805	70696930
12	72718088	72718321
12	74458381	74459248
12	75304165	75304570
12	76444126	76444347
12	77857182	77857856
12	79886673	79886801
12	79968425	79968956
12	82075698	82076370
12	84254411	84254856
12	85195052	85195683
12	85454886	85455487
12	85465032	85465180
12	86163482	86164080
12	86654235	86654764
12	86801391	86801761
12	86932037	86932753
12	93714432	93714543
12	95388167	95388355
12	100244667	100244815
12	100747762	100748030
12	100775406	100775739
12	102058235	102058790
12	102116653	102116871
12	102516175	102516558
12	103685789	103686621
12	104066228	104066468
12	104576702	104577385
12	104609560	104610029
12	104879639	104880061
12	104899903	104900065
12	104910145	104910502
12	104912419	104913155
12	105448746	105448945
12	105982178	105983068
12	106399106	106399379
12	106419299	106419690
12	107656844	107657119
12	109354697	109355871
12	109445902	109446156
12	109911113	109911568
12	109972826	109973013
12	111687257	111687898
12	111694653	111695604
12	111908291	111908801
12	111919857	111920697
13	3877630	3878611
13	5306743	5306971
13	13546547	13547370
13	15421310	15421586
13	16645995	16646865
13	18465760	18466231
13	25489860	25490384
13	25873206	25873483
13	26464256	26465136
13	29124080	29124262
13	31472439	31472641
13	32465812	32466282
13	32879256	32879669
13	34148686	34149115
13	34462757	34463519
13	37550059	37550583
13	41662723	41662924
13	41670045	41670767
13	42374167	42374801
13	42403008	42403832
13	43185709	43185981
13	43309603	43309761
13	43332762	43333232
13	43871685	43871926
13	44100531	44101238
13	46038839	46039523
13	46042881	46043449
13	46096467	46096694
13	46391752	46392159
13	47572400	47572509
13	48552261	48552671
13	51853798	51854516
13	51856976	51857530
13	51868746	51868969
13	51878827	51878977
13	51930174	51930620
13	52024870	52025087
13	52072266	52072438
13	52651655	52652326
13	52807126	52807414
13	52808736	52808912
13	52823073	52823252
13	53011225	53012163
13	54165556	54166330
13	54359108	54359622
13	54384132	54384335
13	54477988	54478077
13	55394542	55394803
13	55494695	55494977
13	56280279	56280609
13	56434494	56434734
13	56582926	56583026
13	57099729	57099918
13	57117415	57117948
13	58426671	58427141
13	59270976	59271169
13	59677292	59677483
13	59840694	59841437
13	59853503	59853627
13	60400594	60400692
13	60523029	60523657
13	63990793	63991381
13	69863228	69863667
13	75785893	75786045
13	83433605	83433827
13	83941774	83942424
13	84483133	84490691
13	85692344	85692727
13	90704303	90704426
13	95912528	95913120
13	96368088	96368349
13	96743151	96743263
13	96960051	96960474
13	97775078	97775196
13	99124900	99125508
13	99254074	99254657
13	99612149	99612438
13	99676266	99676917
13	99737040	99737668
13	99867301	99867451
13	101092226	101092870
13	101811760	101812448
13	101994716	101995214
13	102027591	102028150
13	102625237	102625957
13	105464315	105464455
13	107642213	107642848
13	110775267	110775508
13	110798762	110799457
13	110859478	110860106
13	111044323	111044941
13	112131162	112131538
13	113523479	113523873
13	116173901	116174010
13	119791904	119792041
14	8000787	8001554
14	15168828	15168966
14	15192078	15192642
14	17606121	17606754
14	19284846	19285301
14	21904624	21904882
14	24528516	24528809
14	24902812	24903190
14	24956423	24956899
14	25708830	25709463
14	28865031	28865195
14	30698809	30699408
14	31874970	31875376
14	31963344	31963757
14	33883168	33883433
14	36414620	36415244
14	37311526	37312169
14	41015967	41016059
14	45674942	45675425
14	47863216	47863427
14	47958309	47958500
14	48059453	48060786
14	48086842	48087122
14	48090698	48090834
14	54484669	54484812
14	57165394	57165648
14	58393003	58393104
14	62197085	62197813
14	64557181	64557290
14	64616098	64616555
14	65169745	65170597
14	66873131	66873830
14	71001599	71002142
14	73503545	73504009
14	74455354	74455629
14	76221437	76221932
14	76617570	76618472
14	76708608	76709022
14	76907882	76908343
14	76916527	76916720
14	76931405	76931547
14	76951323	76951984
14	78383228	78383814
14	79274011	79274396
14	80025440	80025959
14	82514875	82515125
14	84442414	84442859
14	88346956	88347777
14	88914122	88914350
14	91087671	91088228
14	91866163	91866515
14	99631101	99631565
14	99745143	99745408
14	102020183	102020980
14	102800109	102800234
14	105224698	105224892
14	105372446	105373362
14	105677039	105677184
14	105731930	105732397
14	106851527	106851760
14	108860833	108860952
14	109173716	109173901
14	109770235	109770904
14	110634326	110634469
14	111507873	111508477
14	112008571	112009056
14	113984873	113985025
14	118737084	118737222
15	3232264	3232640
15	3709331	3709498
15	6923336	6923503
15	6964743	6964839
15	6980927	6981636
15	6987094	6988608
15	7039079	7039556
15	7088738	7089262
15	7201752	7202019
15	8815208	8815986
15	10840473	10841051
15	11055205	11055310
15	11937425	11937615
15	12045395	12045643
15	12285255	12285866
15	14015120	14015406
15	14423350	14423536
15	17801393	17801817
15	20223018	20223697
15	27701945	27702243
15	29774610	29775320
15	31392704	31393136
15	34531940	34532067
15	34535034	34535830
15	34829299	34829434
15	36472197	36472778
15	36739972	36740325
15	36967600	36967956
15	37164527	37164738
15	37226564	37226714
15	38120730	38121274
15	38165782	38166003
15	38603862	38604020
15	39735004	39735517
15	42952052	42952211
15	43964190	43964564
15	51730522	51731377
15	52292733	52292894
15	55907529	55907743
15	58174773	58174981
15	59204269	59204724
15	59630243	59630869
15	60010361	60010571
15	62846013	62846205
15	65474142	65474285
15	66924009	66924142
15	67090435	67091026
15	68070865	68072256
15	68072841	68073280
15	68287026	68287428
15	68506105	68506516
15	68624798	68625238
15	69107752	69108007
15	72381107	72381226
15	73492997	73493777
15	74484152	74484707
15	74676651	74677268
15	76264025	76264840
15	77003199	77003363
15	77342972	77343429
15	78371880	78372474
15	78635122	78635468
15	78719562	78719916
15	79095312	79096038
15	80418083	80418538
15	81523262	81523748
15	81834407	81834547
15	81834908	81835113
15	81835482	81836858
15	81839294	81840314
15	82268736	82269242
15	83595287	83595414
15	84315784	84315910
15	84639178	84640166
15	84664979	84665138
15	84997857	84998296
15	85188276	85188455
15	85611641	85612112
15	86205362	86205531
15	86673192	86673442
15	86768244	86768339
15	87424744	87425006
15	88442806	88443092
15	88443409	88443525
15	88831571	88831715
15	88850147	88851267
15	92840034	92840260
15	93217067	93217172
15	95536065	95536719
15	96527659	96528358
15	97667466	97667862
15	98133738	98134441
15	100574107	100574290
15	100845167	100845696
15	101233254	101234169
15	101278855	101279093
15	101308405	101308891
15	101320385	101321048
15	102750194	102750459
16	4456190	4456835
16	4472394	4473205
16	4834056	4834184
16	4880931	4881885
16	5497715	5497836
16	5595236	5595933
16	7926436	7926733
16	8892075	8892967
16	13233013	13233211
16	13233303	13234008
16	16930619	16931297
16	18761627	18762184
16	21169014	21169123
16	21645037	21645676
16	22674687	22675236
16	22704706	22704884
16	22786561	22786776
16	23953052	23953761
16	23989766	23990359
16	25529860	25529981
16	26249015	26249156
16	26400901	26401263
16	26838905	26839095
16	27547645	27547731
16	29894102	29894788
16	30184446	30185321
16	30828073	30828531
16	31331057	31331227
16	31493965	31494308
16	32130283	32130531
16	37442568	37442771
16	37676091	37676671
16	37684070	37684486
16	38729874	38730377
16	39149136	39149738
16	39185807	39186299
16	39698404	39698561
16	42520387	42520726
16	43732284	43732789
16	49349264	49349817
16	50678651	50678826
16	53549116	53549223
16	55166210	55166685
16	55570970	55571799
16	58542472	58543161
16	62636263	62636388
16	71208967	71209097
16	76216296	76216434
16	76227119	76227390
16	77152379	77152533
16	77808023	77808237
16	78427993	78428117
16	79956001	79956190
16	86532058	86532300
16	89587226	89587401
16	89607940	89608783
16	89705192	89705391
16	90291100	90291444
16	90625701	90625829
16	90694842	90695556
16	90924767	90924958
16	91569041	91569196
16	92232395	92233079
16	92366906	92367281
16	93072113	93072267
16	95841478	95842016
16	97778415	97778736
17	7869087	7869680
17	9725978	9726287
17	10394772	10395399
17	12084856	12084972
17	12095368	12095499
17	25362033	25362140
17	25454448	25454570
17	25517806	25518625
17	26509465	26509583
17	26534883	26535978
17	27173997	27174271
17	27180614	27180708
17	27257536	27260534
17	27345064	27345477
17	28308268	28308683
17	28517618	28518657
17	28521907	28522259
17	30580967	30581787
17	31371187	31371356
17	31912205	31912834
17	31940541	31941050
17	34142197	34142325
17	37028905	37029024
17	37126287	37126689
17	41247360	41247623
17	42315092	42315265
17	43257764	43258202
17	45181385	45182040
17	45574059	45574592
17	48743125	48743595
17	49948355	49948876
17	50349985	50351392
17	51204555	51205191
17	52196988	52197191
17	54019777	54020054
17	61607118	61607454
17	65170614	65171059
17	65566056	65566761
17	66216122	66216332
17	68817520	68817688
17	69768681	69769530
17	69770032	69770533
17	72817829	72817946
17	72970517	72971185
17	73756223	73756410
17	73842771	73843037
17	73962447	73963115
17	76910551	76910746
17	79919911	79920165
17	79938129	79938925
17	80078877	80079359
17	80755007	80755582
17	80775369	80775533
17	80780052	80780287
17	80801246	80802083
17	81260232	81260359
17	82726234	82726363
17	83276079	83276327
17	83939083	83939812
17	84059288	84059658
17	84097943	84098519
17	84116528	84117092
17	84176249	84176919
17	84851857	84852177
17	88274774	88275256
17	88354107	88360609
17	89312176	89312290
17	89655697	89655806
17	93598292	93598523
18	4059131	4059342
18	4209832	4210374
18	4737879	4738645
18	4769519	4769709
18	5155889	5156530
18	5159437	5159955
18	5969615	5970092
18	6734329	6734440
18	8044180	8044632
18	8044869	8045019
18	10295299	10295602
18	11144726	11145349
18	11794228	11794800
18	12128339	12128844
18	12586705	12586939
18	13268473	13268956
18	13601541	13601738
18	14201799	14202774
18	15234854	15235533
18	24074532	24074949
18	25799310	25799458
18	33378385	33378786
18	34089649	34090306
18	34515290	34516024
18	35019127	35019276
18	35262636	35262796
18	38264778	38265056
18	38398388	38398948
18	40678381	40678670
18	41241363	41241506
18	44304431	44304589
18	45897130	45897356
18	45961149	45961648
18	46635076	46635579
18	46650649	46650945
18	46703714	46703829
18	48334896	48335313
18	49092657	49092809
18	49480002	49480524
18	53649914	53650064
18	54250764	54250972
18	54279502	54279610
18	55375792	55376077
18	55624088	55624439
18	55815801	55816689
18	56760200	56760679
18	58394570	58395197
18	60065740	60065880
18	60780082	60780846
18	62142629	62142834
18	62208476	62208679
18	63430998	63431210
18	64791006	64791648
18	64812709	64812859
18	64844335	64844542
18	65260979	65261507
18	65539976	65540242
18	67889800	67889993
18	68723560	68723728
18	68984718	68984922
18	69243619	69244175
18	69689639	69690210
18	70507831	70508041
18	73388354	73388504
18	73730052	73730311
18	74141079	74141341
18	74890577	74890790
18	77570236	77570852
18	77737198	77737594
18	78212683	78213276
18	80715436	80715575
18	82768287	82768911
18	82837146	82837640
18	83523723	83524438
18	83932848	83933360
19	3439049	3439741
19	4493021	4493310
19	5022431	5022541
19	5806102	5806865
19	5822637	5822834
19	5927754	5928687
19	6382384	6382977
19	8641838	8641974
19	9942782	9943651
19	9946894	9947410
19	9978398	9979010
19	10469385	10469587
19	10469594	10469724
19	10473107	10473288
19	10924357	10924961
19	14180386	14180790
19	14180931	14181310
19	14772817	14773358
19	17263183	17263454
19	18354110	18354221
19	19783485	19783893
19	21227348	21227465
19	21381736	21382349
19	21477035	21477323
19	23126582	23126733
19	24583902	24584548
19	24672008	24672151
19	26865705	26866234
19	27566796	27567444
19	28137526	28138158
19	28256862	28256993
19	28743557	28743779
19	29861309	29862808
19	32906064	32906649
19	33079951	33080385
19	34464526	34464799
19	35018602	35018732
19	35418509	35418659
19	36476553	36477928
19	36737103	36737293
19	38260210	38260892
19	38460616	38461260
19	42219801	42219946
19	42669844	42670285
19	43524629	43525275
19	44281059	44281668
19	44311923	44312504
19	46706724	46707349
19	48205292	48205614
19	49629925	49630504
19	50857139	50857403
19	52469206	52469436
19	52624593	52624809
19	53404121	53404465
19	53414981	53415696
19	53501951	53502047
19	54836479	54836705
19	56050396	56050584
19	56050778	56050896
19	56664395	56664945
19	56742583	56742687
19	57525632	57525783
19	59400597	59400727
19	60440382	60441140
2	6086676	6087162
2	6450835	6451122
2	8660569	8660733
2	9287939	9288181
2	11322461	11322640
2	14165486	14166015
2	14341818	14342425
2	15277834	15278041
2	17837785	17838419
2	19145324	19146452
2	21002978	21003450
2	21009865	21010876
2	21028424	21029100
2	24502666	24503165
2	25478017	25478851
2	25852637	25852843
2	26555025	26555710
2	27046150	27046897
2	27598860	27599577
2	28167926	28168126
2	28326256	28326462
2	29095608	29096592
2	29292181	29292550
2	29965185	29965318
2	30693168	30693444
2	30753082	30753859
2	33916553	33917321
2	44462117	44462343
2	44526361	44526972
2	45435385	45435502
2	46330851	46330970
2	46331188	46331393
2	46356405	46357154
2	46879523	46880171
2	47822679	47823267
2	48703181	48703558
2	48736450	48736597
2	50971216	50971743
2	53256796	53257433
2	53688994	53689659
2	53880513	53880703
2	56257623	56257764
2	59431859	59432129
2	61246941	61247052
2	64691386	64691945
2	65832776	65833317
2	66260142	66260349
2	67107350	67107576
2	71162645	71163384
2	71623245	71623450
2	71628598	71629052
2	71629778	71630021
2	77282817	77283272
2	78416771	78417059
2	79143242	79143486
2	79675378	79675537
2	79686970	79687124
2	80388542	80388653
2	82038137	82038267
2	90414052	90414541
2	92435176	92435341
2	92617227	92617480
2	92617717	92617810
2	92687492	92688319
2	92728488	92728587
2	92804523	92804761
2	93355986	93356091
2	93383731	93384365
2	93619486	93619680
2	93903089	93903267
2	101462345	101462794
2	102255265	102255421
2	103144326	103145080
2	104121824	104122296
2	104717896	104718035
2	107537415	107537928
2	107729676	107729779
2	108848127	108848289
2	110176445	110176692
2	110488037	110488746
2	114255252	114255871
2	116920950	116921062
2	116991486	116991763
2	116995569	116995671
2	117079465	117079878
2	117619770	117620072
2	118494777	118495259
2	118749445	118750030
2	118887795	118887924
2	120158979	120159094
2	123387056	123387766
2	127379365	127379507
2	127612055	127612776
2	129419145	129419751
2	129558210	129558448
2	130449567	130450195
2	131599644	131599885
2	131642370	131642999
2	133522209	133522396
2	134222495	134222718
2	136711062	136712351
2	138073962	138074606
2	138793031	138793583
2	139198498	139198657
2	143451230	143451710
2	144246115	144246691
2	145649081	145649202
2	147736373	147736487
2	148162041	148162223
2	148162783	148162935
2	148588758	148589117
2	149614289	149614408
2	151893598	151893962
2	151910327	151910604
2	151957276	151957524
2	152101449	152102187
2	152282298	152282821
2	154580827	154581516
2	154707963	154708256
2	155052743	155053332
2	158642119	158642890
2	161177631	161178295
2	162853835	162854056
2	162923347	162923662
2	163595826	163596549
2	163779431	163780142
2	163994417	163994712
2	164423379	164424030
2	164455827	164456020
2	165073374	165073550
2	165900183	165900880
2	165936037	165936565
2	166417293	166418063
2	167078939	167079550
2	167548233	167548454
2	167844403	167845345
2	167876725	167877401
2	168306785	168307223
2	168337570	168338023
2	168368925	168369526
2	168402794	168403510
2	168440805	168441268
2	169611793	169612046
2	172140088	172140540
2	173141487	173141950
2	178520235	178520946
2	178908812	178909217
2	180273774	180274255
2	180892436	180893279
3	7245134	7245879
3	7979888	7980147
3	8729610	8729960
3	9204029	9204315
3	15184083	15184319
3	18640068	18640823
3	18667652	18668177
3	18941092	18941774
3	21952696	21953339
3	28242454	28243096
3	30785192	30785292
3	31147383	31149139
3	31166144	31166921
3	33217600	33217955
3	33544333	33544476
3	35333841	35334617
3	37757942	37758766
3	38220994	38221168
3	38275327	38275838
3	38618083	38618303
3	39209569	39209930
3	39718997	39719179
3	40053931	40054057
3	40087984	40088377
3	40158616	40158927
3	41430108	41430650
3	42201407	42201788
3	49009106	49009793
3	50459675	50460054
3	51010940	51011408
3	52384365	52384610
3	52392067	52392441
3	52508463	52509266
3	52600476	52601777
3	52629840	52630531
3	52642976	52643429
3	52653066	52653326
3	53355939	53356115
3	53713805	53713988
3	53745001	53745109
3	54552053	54552466
3	55097799	55098390
3	56988499	56988822
3	57224863	57225155
3	57944744	57945294
3	57950827	57951773
3	60114496	60115191
3	61303631	61303801
3	61540642	61540750
3	65455643	65456257
3	66326639	66326751
3	70005330	70005436
3	79015467	79016025
3	82027203	82027732
3	84419277	84419423
3	84490000	84490101
3	86923183	86923514
3	86935533	86935785
3	88001307	88001458
3	88003400	88003557
3	88205391	88206138
3	89918534	89918648
3	90557511	90557609
3	95667971	95668819
3	95675252	95675987
3	95904811	95905126
3	96551304	96551838
3	96552056	96552163
3	98259087	98259809
3	100225453	100225722
3	100402442	100403013
3	101161934	101162176
3	103531908	103532274
3	103713030	103713690
3	104395789	104396246
3	104511931	104512684
3	105181385	105181755
3	105693627	105694197
3	107261933	107262052
3	107841501	107841611
3	107869290	107869489
3	108722632	108722817
3	109176233	109176331
3	110237728	110237819
3	110494462	110494690
3	114450789	114455057
3	117313263	117313764
3	117403696	117404267
3	118140000	118140624
3	120532029	120532259
3	120570989	120571420
3	122992788	122993531
3	123803651	123803930
3	129655829	129656078
3	130833112	130833651
3	130956066	130956256
3	137275481	137275960
3	142940725	142941854
3	143060135	143061020
3	144261041	144261190
3	145729542	145729834
3	149179828	149179967
3	151399527	151399632
4	5085396	5085644
4	8911346	8912003
4	8939063	8939475
4	8962014	8962109
4	8991077	8991499
4	10976053	10976336
4	15306663	15306980
4	15608469	15608938
4	15776008	15776560
4	20816532	20816743
4	22237874	22237993
4	23826726	23827416
4	28298807	28299442
4	29092614	29092844
4	31404869	31405154
4	31819549	31820036
4	32982095	32982715
4	33195063	33195406
4	34237342	34238398
4	40047971	40048522
4	40385290	40385625
4	40713492	40714246
4	45087267	45087672
4	45088395	45088552
4	45156526	45156901
4	50356983	50357109
4	53417986	53418133
4	55497689	55498442
4	55797309	55797456
4	56113359	56114373
4	56201259	56203053
4	56376048	56376158
4	56533403	56533574
4	56658788	56659160
4	56698460	56698795
4	57167206	57167368
4	62440285	62441150
4	62521971	62522450
4	64594905	64595473
4	66550954	66551054
4	69838772	69838900
4	72605145	72605387
4	75466555	75467287
4	81447280	81447773
4	82173873	82174085
4	82246155	82246737
4	82249461	82249663
4	83060800	83061410
4	83215612	83216182
4	84793863	84793968
4	86712669	86713200
4	87723027	87723216
4	88048081	88048840
4	95377436	95377759
4	97210047	97210771
4	98166308	98166499
4	98257954	98258065
4	98873553	98873743
4	102624318	102625072
4	103577408	103577722
4	106121343	106121510
4	106199527	106200562
4	106222108	106222416
4	106656762	106657129
4	110199791	110199915
4	111866570	111867208
4	115881351	115881482
4	118924635	118924829
4	119001504	119001677
4	119039838	119040541
4	119043682	119044862
4	119076747	119077079
4	119150548	119150995
4	120148509	120149195
4	122891059	122891578
4	124198872	124199317
4	124388849	124388974
4	126660942	126661589
4	127833498	127834236
4	127859265	127859719
4	129144948	129145220
4	129743532	129743884
4	130101219	130101736
4	130151461	130151907
4	130865872	130866528
4	131014451	131014774
4	131507991	131508528
4	132524499	132525148
4	132922565	132922801
4	132963728	132963895
4	133107659	133108376
4	133108830	133109088
4	133756852	133757327
4	133814094	133814695
4	133820850	133821433
4	134036001	134036640
4	134044536	134044661
4	134456880	134457402
4	135286761	135287366
4	135839046	135839164
4	136140479	136141044
4	137121463	137122106
4	137181179	137181623
4	137816289	137816576
4	138553419	138554103
4	140399952	140400125
4	141623954	141624151
4	148214458	148215443
4	148589573	148590663
4	148955279	148955403
4	149791317	149792086
4	149889545	149890539
4	150684946	150685625
4	150729505	150730597
4	150784854	150785102
4	150785341	150785490
4	150799909	150800160
4	150825106	150825252
4	150869794	150869958
4	150871354	150872320
4	151862125	151862670
4	152642023	152642777
4	152913112	152913324
4	155481787	155482067
4	155676602	155683958
5	4264547	4264978
5	15859489	15859640
5	17456939	17457237
5	18822515	18822685
5	24041072	24041805
5	25160495	25160877
5	25752703	25753312
5	26176092	26176274
5	26185229	26185861
5	27792264	27792393
5	30949259	30949651
5	33015560	33015866
5	35129246	35129824
5	35138121	35138542
5	35320756	35320892
5	36738730	36739077
5	36803562	36803809
5	38614106	38614272
5	39835888	39836015
5	40272710	40272851
5	42272061	42272552
5	43657311	43659628
5	43845239	43845627
5	49651018	49651236
5	49896226	49896392
5	49958478	49958603
5	51306436	51307413
5	51591618	51592206
5	51783449	51784185
5	55449094	55449321
5	55465419	55465571
5	60023216	60023453
5	63392073	63392360
5	65191421	65192947
5	66244839	66244947
5	67149408	67149582
5	71248466	71249148
5	73738634	73738882
5	73934207	73934356
5	74201309	74201492
5	74875031	74875165
5	75987749	75987906
5	77151067	77151653
5	77531776	77533655
5	77534328	77535065
5	87499048	87499200
5	92102603	92102800
5	92595342	92595556
5	93244274	93244887
5	97700449	97701110
5	99894706	99894843
5	100191126	100192300
5	100636869	100637906
5	102109937	102110609
5	103336160	103336301
5	103421862	103422363
5	103856516	103857437
5	104022834	104023153
5	104236805	104236961
5	108385586	108385851
5	110497340	110498130
5	111876288	111877493
5	112045655	112045789
5	112635626	112636219
5	113930838	113931492
5	115224518	115224779
5	116328118	116328582
5	117000647	117001314
5	118331703	118331918
5	118424454	118425169
5	118425222	118425734
5	119023908	119024230
5	119776268	119776416
5	122510675	122511363
5	122527111	122527604
5	125354802	125355619
5	129299253	129299445
5	129465676	129465790
5	132645054	132645698
5	132653682	132654352
5	134014475	134015072
5	134874212	134874700
5	134891578	134891738
5	135274706	135275170
5	135275933	135276268
5	135280198	135280693
5	135879563	135880151
5	136603017	136603392
5	136996871	136997028
5	137072473	137073165
5	138863321	138864216
5	140542555	140543840
5	140549907	140550285
5	140566144	140566624
5	141115805	141116425
5	142380505	142380741
5	142899213	142899906
5	143586515	143586865
5	144483283	144484060
5	146665235	146665758
5	146882623	146882874
5	147812354	147813079
5	147850379	147850491
5	148609116	148609917
5	149334817	149335524
5	150111366	150111550
5	151023290	151023902
6	5442945	5443801
6	5509186	5510017
6	5510044	5510203
6	6241749	6242630
6	7435013	7435121
6	10468583	10468727
6	10499367	10499650
6	12248560	12249055
6	14142179	14142712
6	14358285	14358612
6	18153114	18153435
6	18856341	18856930
6	19211399	19211530
6	19812232	19812491
6	24272853	24272994
6	24713443	24713648
6	25033086	25033274
6	26736604	26736875
6	30204740	30205325
6	30982579	30982713
6	31065454	31065806
6	31071218	31071600
6	31345308	31345843
6	31348465	31348572
6	31938303	31938987
6	32045086	32045824
6	34575989	34576129
6	35265889	35266428
6	35349662	35350412
6	35383700	35383839
6	37714378	37714500
6	47651180	47655822
6	49021884	49022021
6	50549744	50550242
6	53804354	53804553
6	55376156	55376253
6	55443854	55444072
6	59184925	59185749
6	66401477	66401910
6	69751335	69751429
6	72236918	72237418
6	72276954	72277404
6	72512466	72513346
6	73320816	73321138
6	81783212	81783380
6	82138589	82138740
6	82872208	82872318
6	83775975	83776344
6	84318737	84319284
6	86153490	86153986
6	88133748	88134386
6	88147242	88147926
6	88647793	88648434
6	91606427	91607147
6	93600427	93600568
6	96739662	96739775
6	100149430	100149654
6	100170882	100171388
6	100892460	100892824
6	101385494	101385848
6	107166018	107166605
6	107577619	107577801
6	108022058	108022259
6	108093466	108093830
6	111856223	111856536
6	112242066	112242605
6	112972877	112973015
6	113012253	113012855
6	114998028	114998139
6	117067578	117068331
6	118254738	118255541
6	118341816	118342482
6	119418621	119419503
6	125247921	125248738
6	126217033	126217649
6	126535534	126535784
6	126576645	126576839
6	126585467	126586270
6	126685092	126685629
6	126697776	126698277
6	127405689	127405888
6	127886797	127887438
6	135642765	135643063
6	136339667	136340211
6	140148083	140148673
6	143425737	143425902
6	145321772	145322192
6	146010361	146010927
7	25252141	25252310
7	27166949	27167517
7	27338959	27339818
7	27340111	27340270
7	31082642	31083331
7	34858476	34858751
7	34889442	34889616
7	44464206	44464823
7	44474200	44474897
7	52614939	52615122
7	57940485	57940651
7	59080075	59080289
7	61644910	61645338
7	63956605	63957563
7	63971043	63971161
7	63986736	63987266
7	65234372	65234591
7	65236843	65237166
7	65278429	65278601
7	66219756	66220279
7	66535065	66542304
7	67380000	67380158
7	67884474	67884623
7	67907783	67908067
7	68833703	68834069
7	70118551	70119148
7	71214713	71214842
7	71877744	71877857
7	72572161	72572462
7	73872155	73872256
7	74990092	74990791
7	75399363	75399605
7	78022992	78023512
7	78814851	78815021
7	79194526	79195184
7	79267941	79268380
7	80134277	80135209
7	80149461	80149656
7	80160543	80161570
7	80415301	80415501
7	81110078	81110561
7	81345825	81346139
7	82808615	82808849
7	84424797	84425465
7	90059367	90060030
7	90120139	90120341
7	95621830	95622043
7	96145695	96146106
7	97446071	97447290
7	97747916	97749093
7	97757067	97757849
7	99144559	99144850
7	100035861	100036510
7	101639316	101639585
7	103137540	103138421
7	105728827	105729705
7	109444924	109445428
7	110715449	110716155
7	111263775	111264260
7	111992280	111996073
7	112172673	112173198
7	115371229	115371606
7	116444514	116444933
7	116963764	116964547
7	119850822	119851087
7	122818463	122818580
7	123733121	123733239
7	125159730	125159876
7	125405610	125406155
7	126620499	126620597
7	129810185	129810802
7	129987634	129987911
7	130046282	130046563
7	137518005	137518203
7	138547806	138548390
7	138919169	138919384
7	139883654	139883814
7	141185483	141185613
7	141417904	141418338
7	142391796	142392169
7	142430127	142430806
7	143428372	143428592
7	144953345	144953459
7	145169192	145169732
8	8533088	8533207
8	9143319	9143580
8	10812284	10812661
8	10910813	10911362
8	11550801	11550983
8	13529802	13530411
8	14907292	14907523
8	18916784	18917314
8	20912144	20912335
8	21759775	21759904
8	24242068	24242768
8	24450297	24450991
8	25144784	25145547
8	26680908	26681266
8	26811877	26812064
8	29227607	29227770
8	30216419	30216550
8	34688275	34688431
8	35123288	35123943
8	36031764	36032531
8	36151599	36151828
8	36381662	36381893
8	36384307	36384515
8	44707742	44707851
8	46875888	46876433
8	46890252	46890506
8	56259984	56260307
8	56804795	56804973
8	57436005	57436503
8	60615519	60615775
8	65400339	65400437
8	65414166	65414481
8	66722900	66723259
8	68212316	68212543
8	68940335	68940520
8	69263195	69263799
8	70593094	70593661
8	70833126	70834177
8	72268093	72268851
8	78022819	78022917
8	80444717	80444992
8	80474605	80475344
8	80915502	80915618
8	84659884	84660308
8	86749790	86750581
8	88754939	88755044
8	89882402	89882529
8	92751235	92751563
8	93563874	93564053
8	94118636	94119753
8	94189144	94189935
8	96192663	96192847
8	98260188	98260731
8	98921778	98921901
8	101791041	101791144
8	104410040	104411127
8	110114881	110115041
8	111964506	111964836
8	115943062	115943321
8	116127973	116128091
8	119798832	119799018
8	124574130	124574274
8	124621435	124621712
8	124632424	124633561
8	124775821	124776049
8	125385682	125386369
8	125685399	125685495
8	125722525	125723188
8	125971224	125971578
8	126074729	126075317
8	126118426	126118583
8	126121943	126122142
8	126665642	126666804
8	126667263	126667596
8	126667809	126668370
8	126675058	126675570
8	126683018	126683584
8	126736187	126737154
8	126913603	126914379
8	126915065	126915198
8	127038790	127039085
8	127706437	127706600
8	127928121	127928317
8	128057086	128057191
8	128269107	128269359
9	3297127	3297386
9	9649495	9652982
9	14087598	14087817
9	21041013	21041720
9	27180332	27180880
9	27509770	27510261
9	27766293	27766850
9	32940879	32941313
9	34231506	34231969
9	35522524	35523234
9	37358540	37359235
9	38028804	38028906
9	40241349	40242104
9	40799783	40799949
9	41191237	41191492
9	41950227	41950367
9	43426826	43427091
9	43482244	43482481
9	43537080	43537537
9	44571209	44571734
9	46844468	46844574
9	46908217	46908365
9	46909196	46910240
9	48442721	48443478
9	48859955	48860453
9	49980832	49981075
9	50118473	50119172
9	52105423	52105901
9	52359837	52360007
9	54828070	54828212
9	56066838	56067123
9	56549865	56550373
9	56552824	56553149
9	57969941	57970701
9	60887358	60887533
9	61205075	61205676
9	61215055	61215715
9	61323873	61324141
9	61549562	61550639
9	61558823	61559028
9	61573414	61574232
9	62210521	62211316
9	62997696	62998237
9	63000513	63000739
9	63059320	63059863
9	63091927	63092431
9	63108767	63109751
9	63824888	63825117
9	65586721	65587072
9	66081591	66082441
9	66305444	66305734
9	68239512	68240054
9	68268131	68269044
9	68641098	68641352
9	71609714	71610072
9	77583313	77583551
9	77802012	77802180
9	77825924	77826147
9	78022123	78022575
9	78903602	78903901
9	79031264	79031486
9	80148248	80148833
9	92132417	92132545
9	93589423	93590192
9	94101609	94101773
9	94210582	94210850
9	94261474	94261571
9	95389122	95389296
9	97440427	97440604
9	100218572	100218890
9	101261948	101262314
9	101286739	101287232
9	102496350	102496950
9	102945823	102947024
9	103847007	103847108
9	104268472	104269393
9	106377191	106377821
9	108754343	108754900
9	109899656	109900192
9	110531822	110532552
9	111301994	111302703
9	111972021	111972243
9	111979920	111980101
9	115665374	115665804
9	116408092	116408477
9	120144169	120145002
9	120804531	120805250
9	120896616	120896822
9	122729401	122729653
X	6258520	6258618
X	7474114	7475261
X	11346003	11346158
X	11591696	11592230
X	11654825	11655661
X	11898065	11898937
X	14424938	14425179
X	17099833	17100069
X	17100220	17100325
X	18409571	18410961
X	18882552	18882844
X	19308558	19309291
X	36320575	36320826
X	36389881	36390543
X	36390699	36391208
X	42373823	42374455
X	48025008	48025129
X	76181535	76181944
X	77409180	77409906
X	77479870	77480041
X	100599642	100600220
X	103549823	103549955
X	104956311	104956414
X	105416226	105417573
X	131919473	131919612
X	134923795	134923940
X	139790552	139791259
X	140505528	140506322
X	140507758	140507879
X	140510836	140511883
X	140513315	140513757
X	140519929	140520751
X	140527315	140527429
X	140529284	140529429
X	143080711	143081228
X	145535839	145536074
X	146612466	146612730
X	152072702	152072835
X	152946314	152946478
X	155212044	155212206
X	158591082	158591540
X	158739902	158740174
X	162347892	162347980
X	166766888	166767469

## Sheet: NR3C1_ChIP_Genic
Rat Glucocorticoid Receptor ChIP-Seq from: Polman et al.; doi:10.1210/en.2012-2187 & Pooley et al.; doi:10.1210/en.2016-1929
converted to MM10 and filtered for the presence of the GRE motif
Genic Peaks
Chromosome	Start	End
1	102457324	102458940
1	104814997	104815765
1	104847969	104848111
1	105810547	105811134
1	106342115	106342505
1	11033140	11033239
1	11033305	11034000
1	115694912	115695345
1	11691756	11691901
1	118643251	118643467
1	118980433	118981091
1	119525967	119526764
1	119530952	119531524
1	120115212	120116285
1	120120927	120121748
1	125874392	125874672
1	126381506	126381617
1	126383064	126383750
1	12764262	12764365
1	129373063	129373352
1	129930894	129931438
1	131839059	131839828
1	132010509	132010766
1	132012664	132013718
1	132125535	132126292
1	132598298	132598439
1	132625580	132625838
1	132630162	132630357
1	132727543	132728228
1	133005079	133005582
1	133222618	133223310
1	133372060	133372635
1	133412821	133413451
1	134098989	134099562
1	134196069	134196338
1	134213352	134214114
1	134955743	134956402
1	135036930	135037080
1	135347385	135348160
1	135352318	135353084
1	135404649	135404774
1	135643760	135643983
1	135665402	135665995
1	135780914	135781730
1	138499344	138499945
1	138558623	138558730
1	138571586	138571821
1	14244532	14245416
1	14245811	14246029
1	149871454	149872229
1	150565067	150565996
1	150987280	150987495
1	151341707	151341893
1	151359701	151360306
1	151921300	151921528
1	151961101	151961554
1	151974968	151975108
1	152008235	152008968
1	152434244	152434478
1	152603450	152604047
1	152770935	152771457
1	153011481	153012233
1	153253374	153253956
1	153265486	153266001
1	153901251	153901928
1	154065764	154066407
1	154117612	154118700
1	154503489	154504764
1	154676824	154677319
1	154791765	154792397
1	154811337	154811483
1	155192882	155193515
1	155742753	155742891
1	156112387	156112967
1	156174080	156174210
1	157039235	157040002
1	159523565	159524144
1	159580696	159580886
1	159614468	159615144
1	160101055	160101204
1	160142178	160142717
1	161249555	161249717
1	161876576	161877274
1	162469814	162470159
1	164683793	164684318
1	165312587	165313191
1	165321381	165321865
1	167259720	167259925
1	167392326	167392525
1	170480968	170481206
1	170560657	170560811
1	170648146	170648295
1	170679580	170680771
1	171240158	171240330
1	172026206	172026478
1	172282290	172283143
1	172295536	172296451
1	172300285	172300523
1	172342542	172343133
1	172358183	172359028
1	172365417	172365980
1	174899067	174899261
1	176994634	176995353
1	177078969	177079126
1	178549506	178550227
1	178623762	178624398
1	178933694	178933933
1	179483161	179483324
1	180390336	180390913
1	180393347	180393516
1	181804313	181804561
1	181897237	181897388
1	181965812	181965930
1	182483472	182484147
1	182491776	182492014
1	182851913	182852078
1	184066622	184067448
1	184787692	184787982
1	184877771	184878019
1	188542142	188542316
1	189217496	189218204
1	189246651	189246917
1	192073738	192073987
1	192522537	192522671
1	192678192	192678372
1	192987499	192987926
1	193227591	193227740
1	193362358	193362638
1	194651966	194652630
1	194682220	194682423
1	194700497	194700626
1	194977815	194978441
1	195017114	195017673
1	195088688	195089155
1	20908364	20909121
1	20919604	20920307
1	21052300	21052409
1	21052653	21053094
1	23202289	23202930
1	23765115	23765693
1	25484350	25484496
1	25763475	25763730
1	25767029	25767203
1	25775695	25776263
1	30718273	30718655
1	33523304	33523413
1	34696376	34696925
1	36068329	36068450
1	36572660	36572840
1	36633815	36634323
1	36691308	36691578
1	37083731	37084095
1	37350524	37351019
1	37673979	37674935
1	37686992	37687696
1	37782194	37782425
1	38199630	38200270
1	38380599	38381016
1	38628988	38629532
1	39417522	39418223
1	39464829	39465047
1	39944808	39945700
1	40094667	40094812
1	40433938	40434140
1	41788316	41788585
1	42714453	42714890
1	43178622	43179256
1	43474920	43475106
1	43825737	43826477
1	44173232	44173512
1	5138048	5138264
1	51736836	51737043
1	51789543	51789643
1	52147990	52148199
1	54128533	54129178
1	54361209	54361330
1	54802775	54803007
1	55130845	55131318
1	55224002	55224550
1	55571939	55572189
1	55618352	55618691
1	55665220	55665409
1	55717085	55717838
1	55748465	55749108
1	56839613	56839938
1	56920417	56920975
1	58030675	58030895
1	58190436	58190656
1	60479977	60480349
1	60898212	60898331
1	61794640	61794789
1	61896142	61896305
1	61898861	61898957
1	62743664	62743798
1	62800479	62800852
1	63483813	63483939
1	63493418	63493897
1	63740352	63740502
1	64086601	64087118
1	65376339	65376446
1	66378567	66379305
1	66410203	66410556
1	66550588	66550989
1	66552251	66552922
1	67002742	67003260
1	69684279	69684737
1	70700271	70700724
1	72593381	72594008
1	72711124	72711311
1	73764969	73765107
1	73923272	73923681
1	73944241	73944858
1	74007603	74008196
1	74014674	74015076
1	74047225	74047797
1	74295326	74296155
1	74317851	74317981
1	74329966	74330736
1	74459135	74459300
1	75144568	75144751
1	76483904	76484585
1	77484830	77485319
1	77503859	77504015
1	77506217	77506787
1	78889148	78889369
1	79157825	79157980
1	79751255	79751439
1	80582267	80582679
1	81218718	81219605
1	82864415	82864823
1	82883296	82886183
1	85827302	85827413
1	86211983	86212108
1	87286899	87287703
1	87379265	87379426
1	87650656	87651433
1	87880310	87880442
1	89138353	89138553
1	89478716	89479286
1	89801294	89802022
1	90006990	90007136
1	90204802	90205551
1	90206665	90207239
1	90838095	90838601
1	91199846	91200160
1	91356080	91356541
1	91436131	91436815
1	92100288	92101010
1	92127880	92128025
1	93549115	93549574
1	93567115	93567565
1	93635402	93636059
1	9619720	9619825
1	9851210	9851972
10	100487336	100487681
10	100575360	100575561
10	10093698	10094099
10	10107028	10107846
10	102686695	102687180
10	102690074	102690247
10	105402679	105403137
10	105477844	105478201
10	105490168	105490631
10	106561541	106562199
10	106870293	106870562
10	108518872	108519395
10	108619088	108620138
10	108762230	108762543
10	108801295	108801831
10	108814895	108815052
10	108994279	108994451
10	110155399	110155950
10	110440256	110440788
10	11049312	11049718
10	110878848	110879269
10	110879753	110880053
10	114776215	114776343
10	117224033	117224640
10	118113082	118113377
10	121200015	121200260
10	121613419	121614006
10	122724782	122725172
10	122900626	122900773
10	123117611	123117837
10	123375646	123376288
10	123426860	123429192
10	125293997	125294200
10	12548734	12548918
10	125989671	125990415
10	125990516	125990701
10	127596196	127596439
10	127729321	127729446
10	12792092	12792355
10	128179921	128180514
10	128343892	128344043
10	128727706	128728236
10	13988093	13988646
10	14056795	14057440
10	14075733	14075866
10	14100043	14100648
10	14332511	14332680
10	14530808	14531459
10	17295427	17295771
10	18526610	18526749
10	18527540	18528256
10	19522224	19522771
10	19729374	19736031
10	20130767	20131502
10	20202606	20203367
10	20225839	20226115
10	20285459	20285644
10	21993327	21993915
10	25210364	25211114
10	25280452	25280726
10	25427386	25428101
10	25439538	25439973
10	26913088	26913444
10	27304344	27304476
10	27322714	27322952
10	27387647	27387853
10	27804786	27805195
10	28738023	28738136
10	29193510	29194206
10	29213779	29214177
10	34301259	34301876
10	34904320	34904825
10	3881035	3881617
10	39291298	39291648
10	3940996	3941743
10	39452952	39453350
10	39640783	39641504
10	39648048	39648774
10	3977413	3978626
10	40639057	40639406
10	41118365	41118496
10	41544708	41545052
10	41889213	41890153
10	41893435	41894267
10	41937327	41937457
10	42205052	42205590
10	42231115	42231725
10	42250891	42251911
10	42802407	42802867
10	42940480	42940968
10	43290715	43290863
10	43686583	43686724
10	44586617	44586782
10	45147512	45147642
10	46231701	46231817
10	5197109	5197298
10	52294273	52294808
10	52704556	52704816
10	53549704	53550427
10	5358633	5358927
10	5415739	5415975
10	5505913	5506177
10	58370247	58370884
10	58651163	58651346
10	59896338	59897689
10	60081894	60082433
10	60109983	60110109
10	60298858	60299078
10	60594948	60595620
10	60729097	60729852
10	60820594	60821082
10	62294023	62294458
10	62507931	62508436
10	62508446	62508572
10	63973187	63973703
10	67038780	67039377
10	67131469	67131957
10	67903379	67903969
10	68025645	68025932
10	68150224	68150721
10	69461684	69461868
10	69577191	69577548
10	69690473	69691107
10	70537490	70537933
10	71158247	71158436
10	7204430	7205215
10	74981965	74982401
10	75112442	75113023
10	75373755	75374388
10	75615512	75615838
10	77807495	77807658
10	77920966	77923058
10	7793745	7794368
10	78261401	78261633
10	78452414	78453057
10	79801853	79802636
10	79803725	79804744
10	80312548	80312996
10	80843988	80844766
10	80899865	80900579
10	80962059	80962721
10	82866940	82867683
10	83095521	83095684
10	83096454	83096617
10	83130798	83130985
10	84440598	84441117
10	84668118	84671316
10	86258801	86259523
10	86341212	86342120
10	86720930	86721875
10	86822013	86822429
10	87101386	87101565
10	88392203	88393092
10	88590933	88592025
10	90072716	90073338
10	90308035	90308633
10	90595210	90595820
10	90806332	90806864
10	90881962	90882865
10	91164185	91164899
10	92157682	92158003
10	92172880	92173080
10	93293524	93294160
10	9342512	9343083
10	94296979	94297632
10	94429944	94430227
10	94449195	94449765
10	94572688	94573220
10	95193989	95194526
10	95234468	95234963
10	97940277	97940791
10	98959575	98959796
10	99262833	99263496
11	100083162	100083326
11	100102405	100102540
11	101441645	101442657
11	101586229	101586335
11	102009047	102009177
11	102021236	102021360
11	102509979	102510729
11	102748265	102748595
11	103027128	103027676
11	103358308	103358820
11	103467713	103468215
11	104248728	104249324
11	104270855	104271068
11	104400540	104400776
11	105364382	105365340
11	105944578	105945143
11	106160832	106161642
11	106268081	106269020
11	106344352	106344915
11	106417635	106417867
11	106582868	106583129
11	106664768	106665497
11	106709347	106709652
11	107376393	107376687
11	107376822	107377362
11	107413356	107413743
11	107416486	107416955
11	107649086	107649214
11	107756088	107756886
11	107771997	107772491
11	108008727	108009365
11	108020706	108021160
11	108022866	108023679
11	108061868	108062642
11	108201320	108201507
11	108221390	108222056
11	108224408	108224901
11	108926949	108927172
11	109266238	109266688
11	109347456	109348035
11	109349985	109350282
11	109358431	109358791
11	109418055	109418449
11	109425925	109426502
11	109822197	109822804
11	110448644	110449250
11	113158691	113159014
11	113188014	113188938
11	113292318	113293004
11	113795788	113796172
11	113801643	113801934
11	113806726	113807823
11	114448596	114449743
11	115227131	115227235
11	115244548	115244709
11	115608627	115608870
11	116062074	116062743
11	116290305	116290636
11	116298380	116299015
11	116550048	116550205
11	116612177	116612815
11	117259552	117260107
11	117707160	117707613
11	118205505	118206154
11	118210299	118210554
11	118282777	118283302
11	118345855	118346216
11	11844290	11845068
11	118546083	118546177
11	118628873	118628983
11	119227594	119228338
11	11965536	11966036
11	119829596	119830280
11	119959733	119960199
11	119991167	119991671
11	120014328	120014456
11	120016926	120017645
11	120425604	120426051
11	120796211	120796799
11	120821047	120821514
11	121260396	121260531
11	121626456	121626638
11	16951001	16951573
11	16996892	16997004
11	17161611	17161845
11	17164554	17164713
11	17192600	17192753
11	19923999	19924387
11	20011557	20011788
11	20104710	20104896
11	22273863	22274116
11	23665757	23666413
11	24069247	24069441
11	28422787	28423251
11	28582152	28582413
11	28692932	28693149
11	30102946	30103089
11	30118499	30119082
11	30226092	30226197
11	30517226	30517377
11	31806244	31806953
11	32044176	32044549
11	32374130	32374631
11	32622315	32622441
11	32662193	32662797
11	3335849	3336146
11	33557269	33557517
11	33786465	33787088
11	35374938	35375558
11	35406878	35407209
11	35463326	35463713
11	35639129	35639907
11	35679806	35680226
11	35699005	35699214
11	36072986	36073513
11	36331717	36332339
11	36341735	36342178
11	3719846	3720643
11	3727426	3728167
11	3756394	3756457
11	3785613	3786095
11	40755051	40755838
11	4121914	4122586
11	4160559	4160694
11	41969048	41969329
11	45409676	45409824
11	45869925	45870229
11	45942936	45943731
11	46219108	46219604
11	46254528	46255231
11	46301705	46301812
11	46383916	46384420
11	47988835	47989762
11	4828060	4828233
11	49674147	49674372
11	49939096	49939444
11	50132199	50132535
11	5023074	5023256
11	50744638	50745450
11	51293612	51293924
11	51396194	51396760
11	51756302	51756553
11	52037163	52037236
11	53103648	53103975
11	5317883	5318602
11	54112696	54113945
11	54587521	54587759
11	54833559	54834268
11	54836035	54836736
11	55009702	55009910
11	55414504	55414674
11	57051587	57051763
11	57070389	57070977
11	57207313	57207571
11	57298126	57298629
11	57319263	57319958
11	57776378	57776531
11	58039155	58039571
11	5836187	5836309
11	59075662	59075838
11	59162713	59163037
11	59707376	59708186
11	59785667	59786380
11	59960946	59961070
11	60248517	60248822
11	60317389	60317586
11	60346929	60347402
11	60802209	60802555
11	61849677	61849833
11	61852307	61852403
11	6259064	6259167
11	62606497	62606658
11	62756455	62756825
11	64501007	64501192
11	65243762	65243915
11	66072861	66073307
11	66221840	66222973
11	67229278	67229477
11	67653435	67653785
11	67665031	67665195
11	67667465	67668250
11	68031008	68031401
11	68205828	68207045
11	68321635	68321757
11	68330454	68330857
11	68557447	68557561
11	69096590	69097647
11	69098812	69099970
11	69147495	69148004
11	69410227	69411022
11	69591805	69592423
11	70031455	70031743
11	70686306	70686985
11	70689748	70690507
11	70701947	70702487
11	70710064	70710775
11	70982960	70983204
11	71001836	71002011
11	71652241	71652425
11	71770360	71770931
11	72191472	72191569
11	72522616	72523235
11	73014615	73015318
11	73322811	73323738
11	73326569	73326954
11	74552291	74552849
11	74881994	74882381
11	75014993	75015337
11	75015462	75015565
11	75219448	75219736
11	75431278	75431979
11	75620202	75620828
11	75932402	75932556
11	75935719	75936463
11	76148971	76149134
11	76267784	76268559
11	76309440	76310347
11	76558491	76559158
11	76562493	76563152
11	77174154	77175083
11	77291591	77291711
11	77442258	77442835
11	77481547	77482157
11	77497701	77498491
11	77519150	77519405
11	77604504	77604640
11	77786176	77786833
11	78240014	78240626
11	78317786	78318666
11	78322288	78322907
11	79646712	79647278
11	79788189	79788661
11	80304719	80305370
11	80489229	80489426
11	81135127	81135671
11	81239030	81239626
11	81512460	81512655
11	81516376	81516468
11	81646716	81647277
11	82272617	82272791
11	82908135	82908623
11	83371295	83371601
11	83389713	83402571
11	83441162	83441527
11	84180089	84180587
11	84330685	84331288
11	8445947	8446677
11	8459131	8459741
11	84870721	84871161
11	8496674	8497681
11	85492099	85492593
11	85678598	85679103
11	85755373	85755510
11	86330544	86330974
11	8653836	8654172
11	86596093	86596691
11	87093564	87093695
11	87245457	87245987
11	87259648	87259980
11	87319203	87319700
11	87385621	87386065
11	87462028	87471583
11	87666177	87666658
11	88112618	88114043
11	88210102	88210386
11	88434802	88435002
11	88514753	88514859
11	88644353	88645165
11	88649818	88650303
11	88718314	88718579
11	88839619	88840299
11	89124576	89124865
11	89998614	89998828
11	90378272	90379116
11	94702257	94702890
11	94951959	94952725
11	94998214	94998636
11	95002870	95002968
11	95039423	95040092
11	96824887	96825443
11	96931474	96932266
11	96934691	96935276
11	96956463	96957384
11	97418713	97419728
11	97451625	97451840
11	97469758	97470220
11	97836821	97837457
11	98048997	98049603
11	98270404	98271383
11	98721350	98721964
11	98747726	98748247
11	98754095	98754705
11	98770157	98770350
11	98954464	98954933
11	99333240	99333847
12	100002961	100003095
12	100328160	100329263
12	100437827	100438246
12	100480518	100481173
12	100820249	100820500
12	101793239	101793377
12	101804073	101804290
12	101948069	101948193
12	102151259	102151497
12	102202868	102203494
12	102285929	102286207
12	102305356	102305905
12	102588133	102588886
12	102594534	102594791
12	102609309	102609709
12	102638694	102638871
12	102668220	102668626
12	104826434	104826962
12	104827669	104827869
12	104836948	104837476
12	104838048	104838394
12	104850159	104850399
12	104853770	104853937
12	104859742	104859871
12	105352727	105353299
12	105354345	105354455
12	108309316	108310173
12	108910494	108910608
12	110227822	110228325
12	110975498	110975685
12	110976206	110976309
12	111321186	111321715
12	111592481	111592647
12	111646705	111647264
12	111853386	111853903
12	111894111	111894552
12	113027978	113028596
12	11418206	11418327
12	117107152	117107447
12	117671448	117671567
12	117817119	117817247
12	12262777	12263057
12	12284391	12285134
12	12358654	12359036
12	13499345	13500048
12	14149865	14150580
12	16551089	16551668
12	17724097	17724360
12	21136566	21136877
12	21146104	21146442
12	21184307	21184485
12	21229144	21229339
12	24897530	24898148
12	25096229	25096392
12	25150389	25151042
12	25159762	25159912
12	25412364	25412901
12	26120136	26120297
12	28331804	28332272
12	28607765	28608174
12	28700369	28700504
12	28975049	28975688
12	29177039	29177782
12	29629945	29630606
12	29823216	29823431
12	29823874	29824010
12	31730125	31730715
12	31857598	31858326
12	3309576	3309778
12	3397076	3397273
12	3417942	3418157
12	36112159	36112365
12	3712999	3713370
12	38594192	38594381
12	38597997	38598660
12	40016677	40017373
12	40222236	40222915
12	40231623	40232147
12	4028374	4029058
12	40369798	40370119
12	40464221	40464712
12	40466105	40466748
12	40549016	40549268
12	40609644	40609770
12	40772720	40773184
12	40835062	40835518
12	44270292	44270450
12	44330360	44330893
12	4682712	4683351
12	49324462	49324689
12	50647481	50647789
12	51002082	51002645
12	5125970	5126211
12	5186265	5186682
12	5213563	5214031
12	5216540	5216716
12	5226864	5227137
12	52413215	52413428
12	5268173	5268770
12	5281334	5281500
12	52857722	52858101
12	53986643	53987152
12	55385688	55386523
12	55398363	55399246
12	55491441	55492458
12	5929937	5930080
12	64919919	64920054
12	67212948	67213142
12	70059398	70059971
12	70062194	70062327
12	70291121	70291635
12	70798393	70798656
12	70881223	70882001
12	71840685	71841009
12	71938444	71938932
12	71959772	71959879
12	71977170	71977410
12	73591571	73592120
12	73766289	73766493
12	74075128	74075227
12	74230652	74231285
12	75478614	75478757
12	75485161	75485335
12	75557847	75558040
12	76378222	76378385
12	76710315	76710753
12	76883607	76884519
12	78249269	78249472
12	79035458	79035630
12	79103669	79104308
12	79692013	79692444
12	80199134	80199398
12	80527297	80528426
12	80598034	80598718
12	80810912	80811457
12	80821139	80821864
12	80945356	80945535
12	81661019	81661149
12	82207099	82207265
12	82364586	82364819
12	82369434	82369778
12	83136889	83137043
12	84187782	84188333
12	84343348	84343510
12	8453183	8453979
12	84532134	84533346
12	8454317	8455034
12	84956561	84956800
12	85532404	85533003
12	85612066	85612406
12	85621203	85621380
12	85882800	85882987
12	86103269	86103948
12	87034886	87035438
12	87040993	87041252
12	88839594	88840198
12	89331948	89332061
12	90733673	90733947
12	91015000	91015475
12	95693870	95694110
12	99036369	99037029
12	99609913	99610073
12	99932067	99932304
13	100730622	100731018
13	100954508	100955201
13	101278099	101278573
13	101697874	101698495
13	101708898	101708999
13	101711129	101711214
13	102924466	102924617
13	102940059	102941039
13	102946312	102946596
13	103014370	103015369
13	10340632	10340761
13	104062328	104062762
13	106746723	106747088
13	107798981	107799201
13	109117462	109118002
13	109568835	109569070
13	109577970	109578221
13	111489379	111490377
13	112717299	112720830
13	113844465	113845223
13	113899402	113899567
13	113914018	113914162
13	116871968	116872084
13	116876989	116877098
13	117847301	117847485
13	117939181	117939302
13	118572410	118572540
13	12195868	12196642
13	13628726	13629473
13	13954406	13955447
13	13996494	13996986
13	15542350	15542448
13	15562171	15562811
13	16021180	16021380
13	16937827	16938028
13	17683441	17683603
13	20187412	20187560
13	20228197	20229068
13	20248924	20249711
13	20288385	20288636
13	21449703	21449857
13	23542865	23543632
13	24358871	24359011
13	24945758	24945939
13	25002470	25002591
13	28416267	28416363
13	30186057	30186181
13	30342609	30342872
13	30668394	30668619
13	30895933	30896079
13	31585326	31585444
13	32169810	32170055
13	32236164	32236816
13	32764706	32764825
13	34064170	34064288
13	34227897	34228607
13	34725987	34726205
13	35176759	35176953
13	35603853	35604235
13	35848815	35848927
13	36236743	36236957
13	37250199	37250383
13	3770065	3770443
13	38483294	38483575
13	38510068	38510309
13	40928936	40929411
13	41339495	41340288
13	42075757	42075886
13	42734480	42734749
13	42782334	42782475
13	42783170	42783832
13	42894809	42895012
13	43230056	43230714
13	44484774	44485331
13	44907698	44908011
13	45593768	45593920
13	45627734	45627921
13	45961860	45962365
13	47193001	47193177
13	47199877	47200482
13	48126740	48126931
13	48153254	48153870
13	48593177	48593767
13	48864959	48865400
13	49096879	49097154
13	49246117	49246294
13	49460792	49461620
13	51523225	51523376
13	51847688	51848585
13	52113943	52114803
13	52736107	52736746
13	53472450	53472589
13	54629341	54629683
13	55360629	55361169
13	55697471	55697635
13	5604288	5604429
13	56294934	56295549
13	57684884	57685653
13	57722806	57723484
13	57766211	57766587
13	58547708	58548033
13	58560492	58561267
13	58838088	58838446
13	58938192	58938779
13	59067825	59068032
13	59073665	59074273
13	59079803	59080488
13	59181419	59181573
13	59506251	59506956
13	59572596	59572737
13	60668384	60669262
13	60711183	60711287
13	60727521	60728139
13	63272617	63272725
13	63294284	63294443
13	64263483	64263752
13	64745468	64745709
13	64746105	64746375
13	67022023	67022724
13	73693189	73693815
13	75708089	75708592
13	81094480	81095016
13	81120300	81120818
13	83563290	83563495
13	83731006	83731362
13	83744858	83745038
13	8417264	8420725
13	8820521	8820629
13	8823051	8823601
13	89597511	89597685
13	90111572	90111738
13	90394700	90395404
13	90984926	90985133
13	91477816	91478596
13	9152744	9153069
13	91874316	91875084
13	91915556	91916076
13	92241115	92241235
13	93841528	93843682
13	94290577	94290693
13	95186092	95186224
13	95325001	95325609
13	95782527	95782994
13	95794586	95794687
13	96391990	96392128
13	96489148	96489281
13	96630551	96630703
13	97183073	97183648
13	97565995	97566695
13	98107751	98107892
13	98156542	98157342
13	99100165	99100873
13	99487680	99488507
14	100001376	100001542
14	100286428	100286731
14	101527468	101527686
14	101553346	101553574
14	101840082	101840676
14	101931410	101931638
14	103232584	103232700
14	103516156	103516313
14	103682407	103683333
14	105281081	105281238
14	116498200	116498379
14	11664715	11665211
14	119503096	119503261
14	119670813	119671326
14	12059077	12059686
14	121113718	121114290
14	121198924	121199608
14	121225690	121226184
14	12161837	12162165
14	121698196	121698952
14	12177482	12178116
14	121879587	121879782
14	121882858	121882978
14	12190934	12191428
14	122870800	122871436
14	122890383	122890700
14	12296430	12296924
14	123281965	123282562
14	123296101	123296218
14	124033897	124034014
14	124058679	124058772
14	12427853	12428631
14	124470905	124471077
14	12459668	12459940
14	12504550	12504937
14	12722942	12723120
14	18303355	18303604
14	18701114	18704035
14	18758567	18759121
14	19949954	19950265
14	20595541	20597017
14	20616321	20616900
14	20773975	20774793
14	21537954	21538101
14	21670278	21671015
14	22515735	22515929
14	22751334	22751636
14	22804601	22805012
14	22906514	22906983
14	23573611	23573725
14	23625585	23625722
14	23666562	23666746
14	23724128	23724401
14	23751762	23751973
14	24205533	24205974
14	24607040	24607151
14	24617273	24618003
14	25135468	25135587
14	25377788	25378224
14	25481384	25481603
14	25516128	25516297
14	25529253	25530099
14	25631570	25631760
14	25636354	25637004
14	25739948	25741089
14	25852132	25852699
14	26868554	26868785
14	27076047	27076221
14	27187190	27187404
14	27219505	27220291
14	27342326	27342630
14	27349538	27350295
14	27830114	27830750
14	27860579	27861064
14	27975450	27976111
14	28001696	28001890
14	28240472	28240627
14	29016126	29016375
14	29195334	29195923
14	29228975	29229448
14	29324678	29324804
14	29478117	29478883
14	29847396	29848171
14	29905083	29905331
14	31012786	31013058
14	31661549	31663096
14	31668228	31668429
14	32249438	32249621
14	32301570	32301989
14	32323104	32323615
14	33296601	33297178
14	33358827	33359364
14	34565681	34566208
14	34590674	34591204
14	34591833	34592602
14	35055295	35059022
14	38923866	38924392
14	39009750	39009904
14	45309491	45310117
14	45652408	45652807
14	47389921	47390558
14	47512154	47512393
14	47911551	47911978
14	48052595	48052739
14	50829567	50829783
14	51913832	51914651
14	54748070	54748327
14	55092879	55093079
14	55519358	55520051
14	55591449	55592052
14	57131864	57132603
14	57540509	57541148
14	57619453	57619675
14	57719368	57719518
14	57720597	57724459
14	59548963	59549656
14	59561025	59561546
14	59692222	59692786
14	60066947	60067466
14	60533860	60534072
14	60705423	60705514
14	61147850	61147962
14	62560173	62560301
14	63869898	63870067
14	64342846	64343198
14	64349784	64350396
14	64385811	64386109
14	64432583	64432745
14	64820573	64821334
14	65052907	65053102
14	65080974	65082204
14	65973481	65973709
14	66190020	66190833
14	66274549	66275422
14	66784067	66784547
14	70138322	70138516
14	70203358	70204168
14	70331470	70331817
14	70336348	70336894
14	70530200	70530824
14	70724353	70724479
14	70724644	70724860
14	71103839	71104389
14	73334928	73335376
14	74741989	74742190
14	75156954	75157419
14	75845589	75846249
14	76426351	76426483
14	76762209	76762838
14	77319125	77319679
14	77338321	77339026
14	77569008	77569748
14	77613974	77614148
14	77981528	77981838
14	79236678	79238688
14	79893850	79894145
14	8032265	8032383
14	8308166	8308371
14	8309510	8310589
14	8317524	8318085
14	87098624	87099383
14	87539977	87540058
15	100160219	100160406
15	100257850	100259763
15	100791573	100791845
15	100814679	100814819
15	100960918	100961449
15	101175913	101176164
15	101192907	101193391
15	101204095	101204291
15	101210263	101210535
15	101268700	101268885
15	101271238	101271830
15	102102298	102103104
15	102204756	102205657
15	11907309	11907447
15	12243742	12244246
15	12586086	12586430
15	12728018	12728969
15	25442369	25442506
15	25564163	25564236
15	25948412	25948538
15	26608223	26608679
15	27476067	27476251
15	27616151	27616726
15	27783455	27784242
15	27810775	27811402
15	30548317	30548580
15	30821171	30821332
15	31340952	31341441
15	31530983	31531492
15	31588126	31588980
15	32691092	32691245
15	34082375	34083222
15	34529946	34530217
15	35016149	35016259
15	35885198	35885382
15	38033797	38033923
15	38454295	38454444
15	38585302	38586072
15	39124986	39125663
15	39746250	39746650
15	39770843	39771249
15	39811498	39811703
15	40066743	40067020
15	40121560	40121761
15	41612231	41612424
15	44676240	44677123
15	44699165	44699376
15	44701518	44702044
15	47733375	47733813
15	51231929	51232087
15	52712336	52712919
15	53063476	53064112
15	53107793	53108599
15	53477721	53477969
15	54600720	54600868
15	55134790	55135290
15	57717664	57717855
15	57766480	57766824
15	58272973	58273135
15	58998970	58999506
15	59567376	59567939
15	59593688	59593866
15	59596781	59597219
15	62295124	62295799
15	62641370	62641561
15	63082127	63082268
15	64139859	64140115
15	64362398	64363298
15	66157420	66157564
15	66681764	66682010
15	68258422	68259389
15	69038435	69039046
15	71671423	71671741
15	72726402	72726625
15	73733016	73733698
15	73735055	73735731
15	73751270	73751438
15	76208107	76208537
15	76399996	76400252
15	76783550	76784347
15	77192085	77192717
15	77782364	77782827
15	78004276	78004607
15	78195595	78195748
15	78443192	78443881
15	78445977	78446211
15	78530718	78530871
15	79201259	79202140
15	79348011	79348356
15	79731125	79731244
15	79733649	79733788
15	79741711	79742465
15	79950401	79950789
15	79961440	79961960
15	80012135	80012307
15	80649800	80650175
15	81106066	81106705
15	81110852	81110962
15	81122547	81124232
15	81247849	81248518
15	81347197	81347925
15	81387274	81387366
15	81796242	81796821
15	81959817	81960999
15	82106927	82107637
15	82378371	82379022
15	83450803	83451113
15	83606791	83607089
15	83827979	83828299
15	83978341	83978888
15	83984084	83984210
15	84232183	84232583
15	84273276	84273469
15	84332828	84334502
15	84697575	84698164
15	85032745	85033236
15	85356320	85356446
15	85456939	85457907
15	85569373	85569511
15	85776580	85777198
15	86263757	86264327
15	8642190	8642706
15	8703239	8703633
15	87584138	87584839
15	89255290	89255917
15	91316605	91317541
15	91698079	91698291
15	92112238	92113204
15	92348395	92348989
15	92547759	92548008
15	93706537	93706667
15	95487767	95488538
15	96165044	96165614
15	97315418	97315765
15	97762913	97763181
15	97767542	97767695
15	97796967	97797461
15	98402883	98403234
15	98524316	98524593
15	98812960	98813702
15	99352480	99352740
15	99352863	99353635
15	99713927	99715138
15	99715240	99716069
15	99717416	99718098
15	99759472	99759988
16	10524892	10525079
16	10912565	10912712
16	11690263	11690810
16	12146382	12147107
16	12908817	12908946
16	13367563	13367733
16	13516037	13516210
16	15889570	15890154
16	15958605	15959159
16	17307327	17307740
16	17478174	17478791
16	17497409	17497683
16	17576202	17576492
16	17670849	17671275
16	17850374	17850542
16	18083250	18084047
16	18087626	18087888
16	18340007	18340186
16	18360124	18360281
16	18395600	18395835
16	18412219	18412520
16	20356774	20357534
16	21210973	21211225
16	21850634	21850884
16	22483638	22484034
16	23195999	23196548
16	23232702	23232848
16	23971223	23971512
16	23982915	23983357
16	24325423	24326679
16	24483231	24484369
16	24542618	24543218
16	24780545	24781092
16	24781731	24782532
16	25058934	25059922
16	28704432	28704639
16	28829382	28830402
16	29816790	29817682
16	30984834	30985833
16	31039706	31042776
16	31053617	31053758
16	31199266	31199830
16	31313162	31313389
16	31428760	31429618
16	32333338	32333655
16	33557951	33558600
16	34132667	34133437
16	34236857	34237501
16	34241828	34242430
16	34342393	34342846
16	34347648	34347789
16	34372302	34372851
16	34516712	34517495
16	34909455	34909634
16	34952143	34952511
16	34983999	34984750
16	35055036	35055663
16	35183221	35183691
16	35216494	35216690
16	35768704	35768822
16	36772882	36773573
16	36944852	36945467
16	37617732	37618100
16	37869949	37870375
16	38287671	38288381
16	38433072	38433263
16	38673141	38674177
16	38941119	38941828
16	38947366	38948215
16	38962644	38963296
16	38982647	38982776
16	39188739	39189539
16	40168030	40168662
16	40446676	40446971
16	4091372	4091634
16	4160667	4160970
16	41745037	41745558
16	42998975	42999151
16	43130330	43131085
16	43363668	43364207
16	43443537	43443782
16	43478257	43478526
16	43489197	43489851
16	43525710	43525982
16	43537219	43537755
16	43551853	43552008
16	43626128	43626274
16	43945924	43946223
16	44347397	44349685
16	4644879	4645449
16	4652776	4653189
16	4655352	4656099
16	4740230	4740429
16	4912836	4913611
16	49856134	49856431
16	5130821	5131019
16	52031127	52031806
16	52032416	52033031
16	52094743	52094913
16	52449904	52450355
16	56594978	56595292
16	57167324	57167539
16	57314977	57315369
16	59693479	59693648
16	5976061	5976242
16	6440086	6440286
16	6519450	6519849
16	6552487	6552883
16	67001605	67002159
16	72504497	72504671
16	72643197	72643295
16	72794920	72795408
16	76687773	76688261
16	77477639	77477945
16	77760611	77760882
16	85134776	85134941
16	8858539	8858819
16	90829770	90830484
16	91056366	91056963
16	91305307	91306213
16	92623791	92624478
16	93727577	93728741
16	93932572	93932839
16	94307458	94308105
16	94429992	94430607
16	94585396	94585946
16	94905901	94906505
16	94908218	94909000
16	95241619	95241850
16	96249612	96250008
16	96303906	96305080
16	97127306	97127841
16	9768269	9768947
16	98022427	98023181
17	10483979	10484279
17	10490706	10491088
17	10492834	10493592
17	11799552	11800245
17	11985036	11985150
17	12143945	12144437
17	12190475	12191060
17	14401197	14401416
17	14946931	14947034
17	15423200	15423909
17	15632186	15632371
17	23555533	23555645
17	24443795	24444345
17	24474577	24475096
17	24514751	24515032
17	24557129	24557632
17	25134202	25134361
17	25135547	25135965
17	25156293	25156674
17	25471265	25471980
17	25592231	25592871
17	26616583	26617370
17	26621170	26621668
17	26690795	26691873
17	26693571	26693743
17	26698411	26698540
17	27018662	27019082
17	27201446	27201658
17	27771821	27771925
17	27772801	27773229
17	27954832	27955184
17	28000990	28001082
17	28036982	28037716
17	28272226	28272604
17	28419889	28420819
17	28424546	28424687
17	28428483	28428797
17	28442120	28442729
17	28444918	28445296
17	28478125	28478286
17	28484681	28485224
17	28512457	28513376
17	28513769	28514347
17	28515241	28515993
17	28516084	28516218
17	28522680	28523649
17	28743156	28743404
17	29094165	29095221
17	29637690	29638626
17	29873442	29874070
17	30008765	30008949
17	30251801	30251920
17	30336853	30337625
17	31223050	31223196
17	31499994	31500610
17	32089179	32089812
17	32661858	32662038
17	33524063	33524676
17	33753906	33754063
17	33774610	33775168
17	33812900	33813446
17	3397679	3398232
17	34038290	34038839
17	34564047	34564624
17	34583307	34583857
17	34676504	34676997
17	3502243	3502748
17	35027301	35027795
17	35059705	35059805
17	35697727	35698518
17	35848201	35848613
17	35909919	35910174
17	36026683	36026882
17	37012292	37012766
17	37017649	37018051
17	37018177	37018781
17	39842997	39848823
17	43364565	43365706
17	43387224	43387474
17	43704384	43704997
17	44030423	44031479
17	44227367	44227500
17	44618115	44618424
17	44863204	44863461
17	44943443	44943771
17	45765802	45766404
17	46127889	46127993
17	47010209	47010749
17	47493262	47493707
17	47507622	47508554
17	47753851	47754130
17	48504938	48505300
17	48932542	48932651
17	49525562	49525681
17	50090026	50090172
17	50876115	50876385
17	51031488	51031703
17	5106683	5107282
17	5120545	5121045
17	5228953	5229047
17	53829293	53829645
17	53837971	53838575
17	55561663	55561859
17	55957074	55957678
17	5599173	5599289
17	56108495	56109244
17	56119921	56120225
17	56208629	56209191
17	56756642	56757263
17	5854422	5855029
17	62673851	62674016
17	63119095	63119402
17	65674714	65675520
17	65680063	65680643
17	65701880	65702603
17	65746004	65746938
17	65884609	65885240
17	6661305	6661543
17	66687089	66688118
17	67788722	67788929
17	70260889	70261251
17	70470893	70471620
17	70488709	70489422
17	70497234	70497811
17	70633772	70634106
17	71120448	71120932
17	71140467	71140632
17	71744509	71744705
17	71752285	71752613
17	7194460	7194716
17	72505087	72505341
17	73811568	73812263
17	73831409	73831662
17	78358918	78359128
17	81472519	81473439
17	81475372	81475967
17	84329031	84329558
17	84451733	84451851
17	85335830	85336006
17	86424548	86425358
17	86503567	86503803
17	86504987	86505555
17	8652646	8652922
17	86769621	86770260
17	86786794	86787268
17	86811941	86812489
17	87317263	87317477
17	87327956	87328658
17	88581304	88581944
17	88630054	88630158
17	89094423	89094790
17	8956122	8956321
17	90356282	90356492
17	90435360	90435524
17	90672776	90672911
17	90727754	90728498
17	91025360	91025517
17	91092596	91093137
18	12109786	12111175
18	12351586	12358054
18	13007960	13008133
18	16752900	16753458
18	20666108	20666645
18	22985066	22985792
18	23503348	23503589
18	23511395	23512321
18	24252708	24252897
18	25038949	25039340
18	25107614	25107862
18	25597231	25597508
18	31078475	31078720
18	31932081	31932718
18	32154523	32154781
18	32378271	32378651
18	32955588	32956137
18	34317075	34317216
18	35676000	35676599
18	36028314	36028763
18	36048262	36048475
18	36384960	36385122
18	36679034	36679569
18	37805938	37806649
18	38973276	38973812
18	39024895	39025368
18	39045618	39045813
18	39088838	39089020
18	39094500	39095050
18	40365542	40366126
18	40404486	40405594
18	4346219	4346893
18	44574472	44575262
18	45569911	45570058
18	4839892	4840311
18	49898303	49898516
18	50019433	50019996
18	5074677	5075328
18	52832034	52832518
18	52869765	52870287
18	53246865	53247064
18	53253499	53254236
18	53288440	53288555
18	54983422	54983571
18	54990022	54991052
18	56498213	56499212
18	57132978	57133175
18	57245399	57245735
18	57534686	57535376
18	59035301	59035571
18	60500055	60500584
18	60600054	60600530
18	60609142	60609796
18	60925182	60925871
18	60927082	60927427
18	60932411	60933343
18	61522430	61522879
18	61639763	61640208
18	61655799	61656469
18	61738026	61738783
18	61874697	61875208
18	62324826	62325224
18	62331400	62331655
18	62453957	62454866
18	62540609	62540711
18	62579691	62579951
18	65043889	65044408
18	65075844	65076333
18	6512525	6512642
18	65584700	65585301
18	65588952	65589592
18	65648208	65648665
18	65670947	65671466
18	66132515	66132674
18	66246678	66246832
18	67497704	67498564
18	67569491	67569665
18	68098679	68098868
18	69436301	69436422
18	69446123	69446692
18	69607920	69608485
18	69621562	69622180
18	69634791	69635032
18	69644037	69644469
18	6979375	6979519
18	7184870	7185142
18	72321908	72322012
18	73865936	73866139
18	73879902	73880385
18	74347993	74348434
18	75215078	75215778
18	75251743	75251926
18	75276507	75277054
18	75448219	75448420
18	75502829	75503433
18	76011235	76011591
18	76930146	76930637
18	78995906	78996085
18	79001613	79001753
18	80265439	80265853
18	80269406	80269879
18	80316383	80317575
18	80437683	80437833
18	82522743	82523138
18	82537930	82538711
18	82927671	82927912
18	82972034	82972321
18	84059774	84060080
19	10073245	10073620
19	10096662	10096833
19	10294418	10295069
19	10296823	10297460
19	10402694	10403199
19	10827667	10828305
19	15925633	15926276
19	16262353	16262584
19	16284162	16284329
19	16610602	16610806
19	17636078	17636336
19	17715266	17715534
19	18993390	18993552
19	19101354	19101507
19	20492546	20492816
19	20518243	20518348
19	20549456	20549864
19	20837988	20838166
19	20944349	20944555
19	21588806	21589331
19	21598746	21599265
19	22583620	22584205
19	22684584	22684910
19	22753161	22754084
19	22916324	22917185
19	22961871	22962165
19	22977392	22978008
19	23056541	23057665
19	23057717	23058244
19	23133386	23135502
19	23141887	23142013
19	23151684	23152253
19	23214173	23214795
19	23239302	23239512
19	23563741	23564058
19	24142664	24143218
19	24417484	24417968
19	24762952	24763061
19	25144378	25144903
19	25336946	25337636
19	26615922	26616391
19	28298594	28299135
19	28368279	28368357
19	28502874	28503566
19	28990630	28991472
19	29023992	29024830
19	29028396	29028869
19	30070628	30070921
19	30890536	30890721
19	31714551	31714710
19	32182080	32182629
19	32186320	32186974
19	32227428	32229442
19	32269192	32269965
19	32359168	32359415
19	33177132	33177690
19	33224191	33224337
19	3681011	3681575
19	36990013	36990466
19	38507918	38508000
19	38518933	38519070
19	3852329	3853372
19	38555277	38555875
19	38566838	38566940
19	3860914	3861162
19	40326083	40326591
19	40371690	40372009
19	40395791	40396376
19	40431991	40432515
19	41190297	41190439
19	41509242	41509646
19	41697232	41698034
19	41703140	41703735
19	42170414	42170877
19	42355527	42355853
19	42563006	42563556
19	4272947	4273461
19	43728727	43728936
19	43856541	43856761
19	44303096	44303279
19	44400249	44400891
19	44931266	44931641
19	45027902	45028394
19	45507380	45508085
19	45833957	45834176
19	45915806	45916590
19	46614855	46616540
19	46624007	46624411
19	46644997	46645523
19	46908564	46909531
19	46971150	46971279
19	47328691	47329052
19	47887293	47887819
19	50325704	50326399
19	50476515	50476695
19	50643370	50643923
19	50674763	50675320
19	5108013	5108626
19	53015025	53015459
19	53040181	53040455
19	53194669	53195322
19	53243752	53244299
19	53771398	53771520
19	55184570	55184696
19	56326345	56326492
19	56585792	56586310
19	5661191	5661763
19	57200473	57200709
19	57306264	57306587
19	58260790	58261444
19	5849832	5850739
19	5912650	5913089
19	60528633	60528767
19	60759604	60759829
19	6388158	6388318
19	6399495	6399868
19	6451689	6452492
19	6950743	6951192
19	6951443	6951813
19	6976038	6976647
19	7299177	7299307
19	7302024	7302188
19	7339044	7339558
19	8663874	8664069
19	8711577	8711788
19	8714482	8715434
19	8802544	8802738
2	101577212	101577649
2	101759606	101759833
2	101883015	101883432
2	102061875	102062614
2	102112874	102113023
2	102142355	102142545
2	102624330	102625006
2	102636122	102636581
2	102873549	102873765
2	103210274	103210497
2	103283606	103283775
2	103582299	103582487
2	104465561	104465680
2	106384960	106385151
2	109677775	109678412
2	109934203	109934357
2	109955040	109955607
2	110896436	110897196
2	113186547	113186730
2	11529877	11530624
2	11534839	11535414
2	118389229	118389353
2	118870863	118871055
2	119720900	119721544
2	119733482	119733990
2	119898106	119898655
2	119980528	119980663
2	120605232	120607984
2	120850336	120850826
2	121054294	121054894
2	121298046	121298557
2	121555446	121555586
2	121675703	121675858
2	121676004	121676103
2	124235393	124235518
2	124293548	124294076
2	124656228	124656382
2	125587806	125588547
2	127462474	127462608
2	127514223	127514881
2	127933483	127933771
2	128378786	128378914
2	128709166	128709898
2	128738611	128739723
2	128786266	128786502
2	129536404	129536942
2	130200782	130201275
2	130657469	130658079
2	131160731	131161189
2	131344330	131344970
2	131508294	131509178
2	131822958	131823490
2	131931718	131932623
2	132269340	132269461
2	132279933	132280306
2	132302603	132302815
2	132513766	132514149
2	132620240	132620391
2	132687211	132690259
2	134974638	134975092
2	134976690	134977171
2	135519088	135519289
2	135711980	135712197
2	135759516	135760129
2	13576153	13576381
2	13578383	13578843
2	135851786	135852026
2	135954847	135955039
2	137098703	137098839
2	137821328	137821605
2	138280326	138280438
2	139334603	139335163
2	139612691	139612933
2	139653202	139653400
2	139677179	139677749
2	139964323	139964762
2	140497646	140498053
2	140999560	140999728
2	141464999	141466098
2	141617624	141618240
2	14204480	14204624
2	142380985	142381693
2	143978470	143978601
2	145462305	145462641
2	145598418	145598478
2	145615623	145615856
2	145799044	145799436
2	145801417	145801635
2	145849197	145849709
2	146268736	146269509
2	146324974	146325198
2	14646557	14647075
2	14662628	14662938
2	14703465	14703808
2	14719231	14719616
2	148476390	148476651
2	14879826	14880401
2	148861246	148862167
2	148865005	148865751
2	149872696	149872820
2	151573384	151574073
2	151605119	151606000
2	151924022	151924783
2	152694797	152694988
2	152785146	152786241
2	152819833	152820987
2	153291062	153291544
2	153436019	153436205
2	153484098	153484280
2	155084359	155085002
2	155903368	155904051
2	156196219	156196892
2	156618669	156618986
2	156666114	156666279
2	156983085	156984164
2	156989937	156990022
2	157048493	157049163
2	157172565	157173237
2	157377378	157377623
2	157395886	157395984
2	157436448	157436959
2	157870411	157870634
2	157888890	157889055
[truncated: 1,735 more rows]
